# Supplementary material
Source: PubMed Central journal article supplement (PMC4696868)

# Supporting Information

## Digital NMR Profiles as Building Blocks: Assembling $^1\text{H}$ Fingerprints of Steviol Glycosides

José G. Napolitano,<sup>\*</sup> Charlotte Simmler, James B. McAlpine,

David C. Lankin, Shao-Nong Chen, and Guido F. Pauli<sup>\*</sup>

Department of Medicinal Chemistry and Pharmacognosy, Institute for Tuberculosis Research,  
and UIC/NIH Center for Botanical Dietary Supplements Research. College of Pharmacy,  
University of Illinois at Chicago, 833 South Wood Street, Chicago, Illinois 60612, United States

[jgnapo@uic.edu](mailto:jgnapo@uic.edu); [gfp@uic.edu](mailto:gfp@uic.edu)

## TABLE OF CONTENT

*page*

|                                                                                                                                          |            |
|------------------------------------------------------------------------------------------------------------------------------------------|------------|
| <b>S1.</b> The HiFSA profile of steviol ( <b>1</b> ) in DMSO- <i>d</i> <sub>6</sub> .                                                    | <i>S1</i>  |
| <b>S2.</b> The <sup>1</sup> H fingerprint of steviol ( <b>1</b> ) in DMSO- <i>d</i> <sub>6</sub> (44 mM, 600 MHz, 298 K).                | <i>S3</i>  |
| <b>S3.</b> The HiFSA profile of rubusoside ( <b>2</b> ) in DMSO- <i>d</i> <sub>6</sub> .                                                 | <i>S4</i>  |
| <b>S4.</b> The <sup>1</sup> H fingerprint of rubusoside ( <b>2</b> ) in DMSO- <i>d</i> <sub>6</sub> (21 mM, 600 MHz, 298 K).             | <i>S6</i>  |
| <b>S5.</b> The HiFSA profile of steviolbioside ( <b>3</b> ) in DMSO- <i>d</i> <sub>6</sub> .                                             | <i>S7</i>  |
| <b>S6.</b> The <sup>1</sup> H fingerprint of steviolbioside ( <b>3</b> ) in DMSO- <i>d</i> <sub>6</sub> (20 mM, 600 MHz, 298 K).         | <i>S9</i>  |
| <b>S7.</b> The HiFSA profile of stevioside ( <b>4</b> ) in DMSO- <i>d</i> <sub>6</sub> .                                                 | <i>S10</i> |
| <b>S8.</b> The <sup>1</sup> H fingerprint of stevioside ( <b>4</b> ) in DMSO- <i>d</i> <sub>6</sub> (29 mM, 600 MHz, 298 K).             | <i>S13</i> |
| <b>S9.</b> The HiFSA profile of dulcoside A ( <b>5</b> ) in DMSO- <i>d</i> <sub>6</sub> .                                                | <i>S14</i> |
| <b>S10.</b> The <sup>1</sup> H fingerprint of dulcoside A ( <b>5</b> ) in DMSO- <i>d</i> <sub>6</sub> (33 mM, 600 MHz, 298 K).           | <i>S17</i> |
| <b>S11.</b> The HiFSA profile of rebaudioside A ( <b>6</b> ) in DMSO- <i>d</i> <sub>6</sub> .                                            | <i>S18</i> |
| <b>S12.</b> The <sup>1</sup> H fingerprint of rebaudioside A ( <b>6</b> ) in DMSO- <i>d</i> <sub>6</sub> (23 mM, 600 MHz, 298 K).        | <i>S21</i> |
| <b>S13.</b> The HiFSA profile of rebaudioside B ( <b>7</b> ) in DMSO- <i>d</i> <sub>6</sub> .                                            | <i>S22</i> |
| <b>S14.</b> The <sup>1</sup> H fingerprint of rebaudioside B ( <b>7</b> ) in DMSO- <i>d</i> <sub>6</sub> (26 mM, 600 MHz, 298 K).        | <i>S25</i> |
| <b>S15.</b> The HiFSA profile of rebaudioside C ( <b>8</b> ) in DMSO- <i>d</i> <sub>6</sub> .                                            | <i>S26</i> |
| <b>S16.</b> The <sup>1</sup> H fingerprint of rebaudioside C ( <b>8</b> ) in DMSO- <i>d</i> <sub>6</sub> (35 mM, 600 MHz, 298 K).        | <i>S29</i> |
| <b>S17.</b> The HiFSA profile of isosteviol ( <b>9</b> ) in DMSO- <i>d</i> <sub>6</sub> .                                                | <i>S30</i> |
| <b>S18.</b> The <sup>1</sup> H fingerprint of isosteviol ( <b>9</b> ) in DMSO- <i>d</i> <sub>6</sub> (37 mM, 600 MHz, 298 K).            | <i>S32</i> |
| <b>S19.</b> The HiFSA profile of isosteviol monoside ( <b>10</b> ) in DMSO- <i>d</i> <sub>6</sub> .                                      | <i>S33</i> |
| <b>S20.</b> The <sup>1</sup> H fingerprint of isosteviol monoside ( <b>10</b> ) in DMSO- <i>d</i> <sub>6</sub> (8.3 mM, 600 MHz, 298 K). | <i>S35</i> |
| <b>S21.</b> The HiFSA profile of erythritol ( <b>12</b> ) in DMSO- <i>d</i> <sub>6</sub> .                                               | <i>S36</i> |
| <b>S22.</b> The <sup>1</sup> H fingerprint of erythritol ( <b>12</b> ) in DMSO- <i>d</i> <sub>6</sub> (107 mM, 600 MHz, 298 K).          | <i>S37</i> |

# S1. The HiFSA profile of steviol (1) in DMSO-*d*<sub>6</sub> [in PERCH parameter (.pms) file format].

\* NEW: the lines beginning by \* are comment lines !  
\* To keep all the chemical shifts fixed during iteration  
\* replace "CHEMICAL SHIFTS(HZ):" by "..SHIFTS(HZ): fixed"  
\* The couplings can be fixed in the same way

NMR-data: c:\HIFSA\Stevia\Steviol  
#Date 10.10.2014; Time 18:24:58 steviol.pms

CHEMICAL SHIFTS (PPM) :  
PROTON 2\*SPIN= 1 SPECIES=1H POPULATION(Y)= 0.05205  
H1A / 1 0.780095 1\*1\*1 STAT=Y PRED= 0.779 RANGE= 0.050 WIDTH(Y)= 2.965 RESP(Y)= 0.9579 HSQC= C1  
H1B / 1 1.786652 1\*1\*1 STAT=Y PRED= 1.778 RANGE= 0.050 WIDTH(Y)= 2.860 RESP(Y)= 0.9901 HSQC= C1  
H2A / 1 1.775352 1\*1\*1 STAT=Y PRED= 1.764 RANGE= 0.050 WIDTH(Y)= 2.883 RESP(Y)= 0.9034 HSQC= C2  
H2B / 1 1.336829 1\*1\*1 STAT=Y PRED= 1.332 RANGE= 0.050 WIDTH(Y)= 2.797 RESP(Y)= 0.9269 HSQC= C2  
H3A / 1 2.005322 1\*1\*1 STAT=Y PRED= 2.000 RANGE= 0.050 WIDTH(Y)= 2.234 RESP(Y)= 0.9312 HSQC= C3  
H3B / 1 0.929896 1\*1\*1 STAT=Y PRED= 0.932 RANGE= 0.050 WIDTH(Y)= 2.524 RESP(Y)= 0.9292 HSQC= C3  
H5A / 1 1.014807 1\*1\*1 STAT=Y PRED= 1.015 RANGE= 0.050 WIDTH(Y)= 2.506 RESP(Y)= 0.9664 HSQC= C5  
H6A / 1 1.704304 1\*1\*1 STAT=Y PRED= 1.700 RANGE= 0.050 WIDTH(Y)= 2.803 RESP(Y)= 0.9192 HSQC= C6  
H6B / 1 1.745031 1\*1\*1 STAT=Y PRED= 1.737 RANGE= 0.050 WIDTH(Y)= 2.776 RESP(Y)= 0.9360 HSQC= C6  
H7A / 1 1.359640 1\*1\*1 STAT=Y PRED= 1.360 RANGE= 0.050 WIDTH(Y)= 2.677 RESP(Y)= 0.9031 HSQC= C7  
H7B / 1 1.454838 1\*1\*1 STAT=Y PRED= 1.449 RANGE= 0.050 WIDTH(Y)= 2.611 RESP(Y)= 0.9915 HSQC= C7  
H9A / 1 0.918964 1\*1\*1 STAT=Y PRED= 0.921 RANGE= 0.050 WIDTH(Y)= 2.972 RESP(Y)= 0.9761 HSQC= C9  
H11A / 1 1.660380 1\*1\*1 STAT=Y PRED= 1.651 RANGE= 0.050 WIDTH(Y)= 3.204 RESP(Y)= 0.9509 HSQC= C11  
H11B / 1 1.445476 1\*1\*1 STAT=Y PRED= 1.429 RANGE= 0.050 WIDTH(Y)= 2.796 RESP(Y)= 0.9007 HSQC= C11  
H12A / 1 1.357659 1\*1\*1 STAT=Y PRED= 1.348 RANGE= 0.025 WIDTH(Y)= 2.742 RESP(Y)= 1.0000 HSQC= C12  
H12B / 1 1.599403 1\*1\*1 STAT=Y PRED= 1.599 RANGE= 0.050 WIDTH(Y)= 2.825 RESP(Y)= 0.9451 HSQC= C12  
H14A / 1 1.870381 1\*1\*1 STAT=Y PRED= 1.869 RANGE= 0.455 WIDTH(Y)= 2.593 RESP(Y)= 0.9685 HSQC= C14  
H14B / 1 1.189951 1\*1\*1 STAT=Y PRED= 1.192 RANGE= 0.050 WIDTH(Y)= 2.546 RESP(Y)= 0.9764 HSQC= C14  
H15A / 1 2.015428 1\*1\*1 STAT=Y PRED= 2.023 RANGE= 0.050 WIDTH(Y)= 2.603 RESP(Y)= 0.9421 HSQC= C15  
H15B / 1 2.047400 1\*1\*1 STAT=Y PRED= 2.052 RANGE= 0.050 WIDTH(Y)= 2.093 RESP(Y)= 0.9264 HSQC= C15  
H17A / 1 4.878194 1\*1\*1 STAT=Y PRED= 4.878 RANGE= 0.025 WIDTH(Y)= 1.665 RESP(Y)= 0.9638 HSQC= C17  
H17B / 1 4.687131 1\*1\*1 STAT=Y PRED= 4.687 RANGE= 0.025 WIDTH(Y)= 1.740 RESP(Y)= 0.9720 HSQC= C17  
H18B / 1 1.100801 1\*1\*3 STAT=Y PRED= 1.101 RANGE= 0.050 WIDTH(Y)= 2.009 RESP(Y)= 0.9314 HSQC= C18  
H20B / 1 0.866253 1\*1\*3 STAT=Y PRED= 0.866 RANGE= 0.050 WIDTH(Y)= 2.279 RESP(Y)= 0.9416 HSQC= C20  
H21A / 1 4.733292 1\*1\*1 STAT=Y PRED= 4.733 RANGE= 0.050 WIDTH(Y)= 1.405 RESP(Y)= 0.9753  
H22A / 1 11.979751 1\*1\*1 STAT=Y PRED= 11.981 RANGE= 0.050 WIDTH(Y)= 5.637 RESP(Y)= 0.7926  
DMSO\_CH 2\*SPIN= 1 SPECIES=1H POPULATION(Y)= 0.71336  
DMSO / 2 2.500022 1\*1\*1 STAT=Y PRED= 2.500 RANGE= 0.050 WIDTH(Y)= 1.445 RESP(Y)= 1.0000  
DMSO\_D 2\*SPIN= 2 SPECIES=2D POPULATION(Y)= 0.71336  
DMSOD1/ 2 -100.000003 1\*1\*1 STAT=Y PRED= -99.999 RANGE= 0.050 WIDTH(Y)= 1.500 RESP(Y)= 1.0000  
DMSOD2/ 2 -100.000003 1\*1\*1 STAT=Y PRED= -99.999 RANGE= 0.050 WIDTH(Y)= 1.500 RESP(Y)= 1.0000  
WATER\_H 2\*SPIN= 1 SPECIES=1H POPULATION(Y)= 0.19557  
WATER / 3 3.334570 2\*1\*1 STAT=Y PRED= 3.338 RANGE= 0.050 WIDTH(Y)= 1.587 RESP(Y)= 1.0000  
MEOH\_H 2\*SPIN= 1 SPECIES=1H POPULATION(Y)= 0.03903  
MEOH1 / 4 3.165037 1\*1\*3 STAT=Y PRED= 3.160 RANGE= 0.050 WIDTH(Y)= 1.593 RESP(Y)= 1.0000  
MEOH2 / 4 4.102015 1\*1\*1 STAT=Y PRED= 4.010 RANGE= 0.050 WIDTH(Y)= 1.895 RESP(Y)= 1.0000

COUPLING CONSTANTS (HZ) :  
J12\_13 -12.7498 J H1A H1B STAT=Y PRED= -13.130 RANGE= 1.500  
J17\_12 13.7463 J H1A H2A STAT=Y PRED= 12.550 RANGE= 2.560  
J12\_18 4.1788 J H1A H2B STAT=Y PRED= 4.380 RANGE= 3.800  
J14\_12 -0.6692 J H1A H20B STAT=Y PRED= -0.790 RANGE= 0.400  
J17\_13 3.7509 J H1B H2A STAT=Y PRED= 3.880 RANGE= 3.800  
J13\_18 2.6839 J H1B H2B STAT=Y PRED= 2.510 RANGE= 2.800  
J13\_19 1.3750 J H1B H3A STAT=Y PRED= 2.850 RANGE= 1.280  
J17\_18 -13.9964 J H2A H2B STAT=Y PRED= -13.190 RANGE= 1.500  
J17\_19 3.3548 J H2A H3A STAT=Y PRED= 3.860 RANGE= 3.800  
J17\_20 13.5567 J H2A H3B STAT=Y PRED= 12.570 RANGE= 2.560  
J19\_18 2.7383 J H2B H3A STAT=Y PRED= 2.530 RANGE= 2.800  
J20\_18 4.1739 J H2B H3B STAT=Y PRED= 4.310 RANGE= 3.800  
J19\_20 -13.1052 J H3A H3B STAT=Y PRED= -13.110 RANGE= 1.500  
J21\_22 12.2052 J H5A H6A STAT=Y PRED= 12.550 RANGE= 2.560  
J21\_23 2.1358 J H5A H6B STAT=Y PRED= 1.710 RANGE= 2.800  
J22\_23 -13.8273 J H6A H6B STAT=Y PRED= -13.190 RANGE= 1.500  
J22\_24 13.8865 J H6A H7A STAT=Y PRED= 12.990 RANGE= 2.560  
J22\_25 2.9928 J H6A H7B STAT=Y PRED= 3.320 RANGE= 3.800  
J23\_24 3.4578 J H6B H7A STAT=Y PRED= 3.410 RANGE= 3.800  
J23\_25 3.2975 J H6B H7B STAT=Y PRED= 3.190 RANGE= 3.800  
J24\_25 -12.8784 J H7A H7B STAT=Y PRED= -13.130 RANGE= 1.500  
J26\_1 0.2028 J H9A H11A STAT=Y PRED= 0.490 RANGE= 2.800  
J26\_2 8.2034 J H9A H11B STAT=Y PRED= 9.030 RANGE= 3.580  
J26\_6 0.8346 J H9A H14B STAT=Y PRED= 2.290 RANGE= 1.100  
J1\_2 -15.0120 J H11A H11B STAT=Y PRED= -13.010 RANGE= 1.500  
J3\_1 1.3806 J H11A H12A STAT=Y PRED= 1.040 RANGE= 2.800  
J4\_1 5.9099 J H11A H12B STAT=Y PRED= 6.480 RANGE= 3.800  
J3\_2 6.5580 J H11B H12A STAT=Y PRED= 6.890 RANGE= 3.800  
J4\_2 13.7823 J H11B H12B STAT=Y PRED= 11.180 RANGE= 2.800  
J3\_4 -11.8435 J H12A H12B STAT=Y PRED= -12.880 RANGE= 1.500  
J3\_6 2.6575 J H12A H14B STAT=Y PRED= 2.670 RANGE= 1.280  
J5\_6 -10.7418 J H14A H14B STAT=Y PRED= -12.450 RANGE= 2.000  
J7\_5 2.5849 J H14A H15A STAT=Y PRED= 1.650 RANGE= 1.280  
J7\_8 -17.0549 J H15A H15B STAT=Y PRED= -14.390 RANGE= 3.000  
J7\_9 -2.0579 J H15A H17A STAT=Y PRED= -2.030 RANGE= 1.000  
J7\_10 -1.5104 J H15A H17B STAT=Y PRED= -1.900 RANGE= 0.950

|        |         |         |        |        |              |              |
|--------|---------|---------|--------|--------|--------------|--------------|
| J9_8   | -2.8704 | J H15B  | H17A   | STAT=Y | PRED= -2.420 | RANGE= 1.200 |
| J10_8  | -2.4953 | J H15B  | H17B   | STAT=Y | PRED= -2.140 | RANGE= 1.100 |
| J9_10  | 1.5539  | J H17A  | H17B   | STAT=Y | PRED= 2.980  | RANGE= 4.000 |
| JDMSO1 | 1.7939  | J DMSO  | DMSOD1 | STAT=Y | PRED= 1.700  | RANGE= 0.050 |
| JDMSO1 | 1.7939  | J DMSO  | DMSOD2 | STAT=Y | PRED= 1.700  | RANGE= 0.050 |
| JMEOH1 | 5.0000  | J MEOH1 | MEOH2  | STAT=Y | PRED= 5.000  | RANGE= 0.050 |

CONTROL PARAMETERS:

Solvent = none (def. 99% enriched)  
 1.000 = Concentration (vol%, def=1.0%)  
 0.00100000 = Minimum line-intensity  
 0.00100000 = Diagonalization criterium (not in use)  
 600.12700400 = FIELD(1H,MHz), used to transform shifts to ppms  
 22.47832137 = Left frequency (ppm)  
 -7.49157667 = Right frequency (ppm)  
 0.000 = Acquisition time (s, for QMILS)  
 1.404 = Line-width (for modes D, P & T, 0=use defaults)  
 0.137220373 = Data-point resolution (Hz)  
 42.415 = GAUSSIAN (% , 0=use default from INF)  
 -4.744 = Dispersion contribution (% , 0=use default from INF)  
 0.00000000 = Decoupling frequency (for DORES)

CONSTRAINTS (in equations X0 = 1.0)...use no empty lines

EQUAL DMSOD1 = DMSOD2  
 1.000 \* 1.0 = -41.020 \* 1.0 - 1.000 \* 1.0  
 10.000 \* 1.0 = -38.340 \* 1.0 - 1.000 \* 1.0  
 11.000 \* 1.0 = -16.670 \* 1.0 - 1.000 \* 1.0  
 12.000 \* 1.0 = -36.870 \* 1.0 - 1.000 \* 1.0  
 13.000 \* 1.0 = -80.200 \* 1.0 - 1.000 \* 1.0  
 14.000 \* 1.0 = -49.010 \* 1.0 - 1.000 \* 1.0  
 15.000 \* 1.0 = -48.090 \* 1.0 - 1.000 \* 1.0  
 16.0 \* 1.0 = -153.1 \* 1.0 - 1.0 \* 1.0  
 17.0 \* 1.0 = -104.2 \* 1.0 - 1.0 \* 1.0  
 18.000 \* 1.0 = -28.210 \* 1.0 - 1.000 \* 1.0  
 19.0 \* 1.0 = -185.4 \* 1.0 - 1.0 \* 1.0  
 2.000 \* 1.0 = -19.040 \* 1.0 - 1.000 \* 1.0  
 20.000 \* 1.0 = -14.770 \* 1.0 - 1.000 \* 1.0  
 3.000 \* 1.0 = -37.520 \* 1.0 - 1.000 \* 1.0  
 4.000 \* 1.0 = -43.240 \* 1.0 - 1.000 \* 1.0  
 5.000 \* 1.0 = -55.060 \* 1.0 - 1.000 \* 1.0  
 6.000 \* 1.0 = -21.840 \* 1.0 - 1.000 \* 1.0  
 7.000 \* 1.0 = -40.820 \* 1.0 - 1.000 \* 1.0  
 8.000 \* 1.0 = -42.640 \* 1.0 - 1.000 \* 1.0  
 9.000 \* 1.0 = -55.850 \* 1.0 - 1.000 \* 1.0

END of FILE

**S2.** The  $^1\text{H}$  fingerprint of steviol (**1**) in  $\text{DMSO-}d_6$  (44 mM, 600 MHz, 298 K). The calculated and observed NMR spectra are shown in red and blue, respectively.

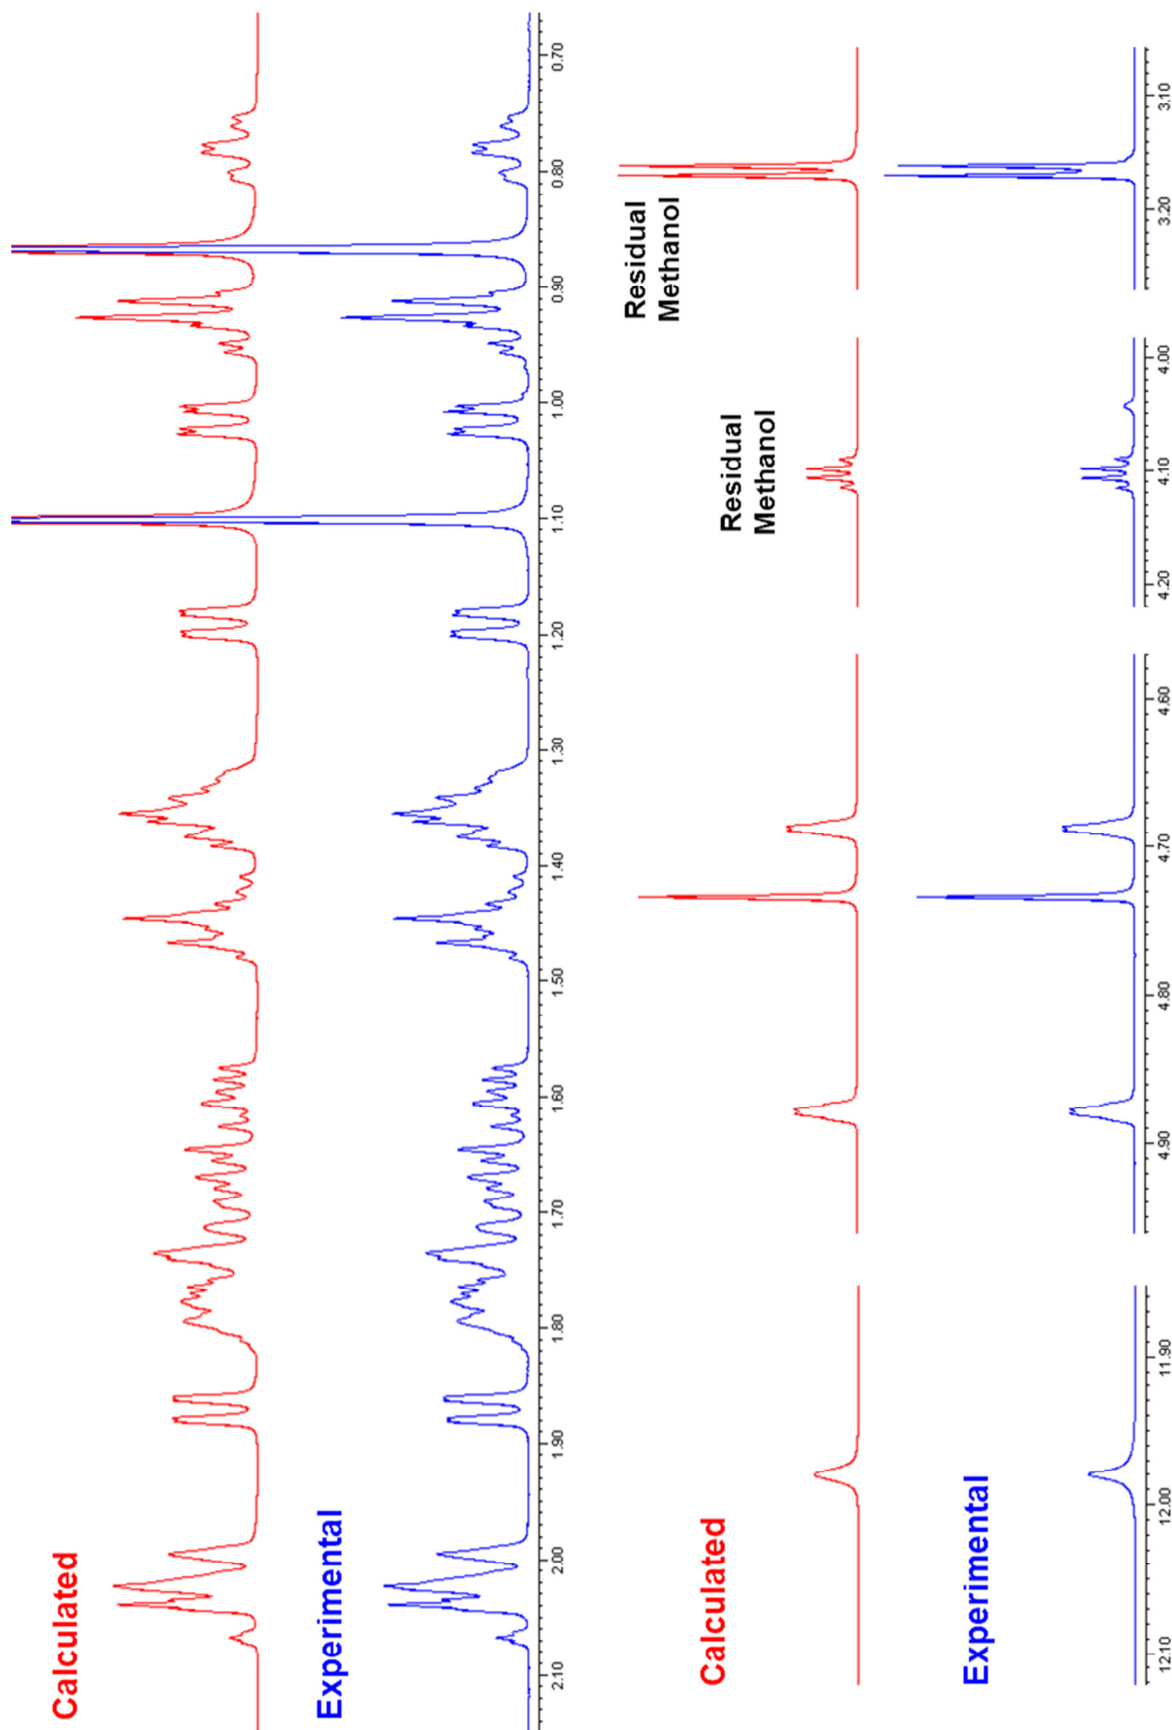

### S3. The HiFSA profile of rubusoside (2) in DMSO-*d*<sub>6</sub> [in PERCH parameter (.pms) file format].

\* NEW: the lines beginning by \* are comment lines !  
\* To keep all the chemical shifts fixed during iteration  
\* replace "CHEMICAL SHIFTS(HZ):" by "..SHIFTS(HZ): fixed"  
\* The couplings can be fixed in the same way

NMR-data: c:\HIFSA\Stevia\Rubusoside  
#Date 10.10.2014; Time 21: 6:43 rubusoside.pms

#### CHEMICAL SHIFTS (PPM):

```
PROTON      2*SPIN= 1 SPECIES=1H      POPULATION(Y)= 0.06075
H1A / 1      0.775810 1*1*1 STAT=Y PRED= 0.779 RANGE= 0.050 WIDTH(Y)= 3.894 RESP(Y)= 0.9579 HSQC= C1
H1B / 1      1.771873 1*1*1 STAT=Y PRED= 1.778 RANGE= 0.050 WIDTH(Y)= 3.704 RESP(Y)= 0.9901 HSQC= C1
H2A / 1      1.775486 1*1*1 STAT=Y PRED= 1.764 RANGE= 0.050 WIDTH(Y)= 3.488 RESP(Y)= 0.9034 HSQC= C2
H2B / 1      1.355135 1*1*1 STAT=Y PRED= 1.332 RANGE= 0.050 WIDTH(Y)= 2.805 RESP(Y)= 0.9269 HSQC= C2
H3A / 1      2.079040 1*1*1 STAT=Y PRED= 2.000 RANGE= 0.050 WIDTH(Y)= 3.184 RESP(Y)= 0.9312 HSQC= C3
H3B / 1      0.985283 1*1*1 STAT=Y PRED= 0.932 RANGE= 0.050 WIDTH(Y)= 3.559 RESP(Y)= 0.9292 HSQC= C3
H5A / 1      1.048010 1*1*1 STAT=Y PRED= 1.015 RANGE= 0.050 WIDTH(Y)= 3.894 RESP(Y)= 0.9664 HSQC= C5
H6A / 1      1.928634 1*1*1 STAT=Y PRED= 1.700 RANGE= 0.050 WIDTH(Y)= 3.922 RESP(Y)= 0.9192 HSQC= C6
H6B / 1      1.711646 1*1*1 STAT=Y PRED= 1.737 RANGE= 0.050 WIDTH(Y)= 3.695 RESP(Y)= 0.9360 HSQC= C6
H7A / 1      1.340752 1*1*1 STAT=Y PRED= 1.360 RANGE= 0.050 WIDTH(Y)= 3.870 RESP(Y)= 0.9031 HSQC= C7
H7B / 1      1.467309 1*1*1 STAT=Y PRED= 1.449 RANGE= 0.050 WIDTH(Y)= 4.055 RESP(Y)= 0.9915 HSQC= C7
H9A / 1      0.915919 1*1*1 STAT=Y PRED= 0.921 RANGE= 0.050 WIDTH(Y)= 3.516 RESP(Y)= 0.9761 HSQC= C9
H11A / 1     1.695791 1*1*1 STAT=Y PRED= 1.651 RANGE= 0.050 WIDTH(Y)= 3.486 RESP(Y)= 0.9509 HSQC= C11
H11B / 1     1.500776 1*1*1 STAT=Y PRED= 1.429 RANGE= 0.050 WIDTH(Y)= 3.863 RESP(Y)= 0.9007 HSQC= C11
H12A / 1     1.368745 1*1*1 STAT=Y PRED= 1.348 RANGE= 0.025 WIDTH(Y)= 3.019 RESP(Y)= 1.0000 HSQC= C12
H12B / 1     1.845911 1*1*1 STAT=Y PRED= 1.599 RANGE= 0.050 WIDTH(Y)= 4.046 RESP(Y)= 0.9451 HSQC= C12
H14A / 1     2.076299 1*1*1 STAT=Y PRED= 1.869 RANGE= 0.455 WIDTH(Y)= 3.655 RESP(Y)= 0.9685 HSQC= C14
H14B / 1     1.442310 1*1*1 STAT=Y PRED= 1.192 RANGE= 0.050 WIDTH(Y)= 3.290 RESP(Y)= 0.9764 HSQC= C14
H15A / 1     1.987999 1*1*1 STAT=Y PRED= 2.023 RANGE= 0.050 WIDTH(Y)= 3.726 RESP(Y)= 0.9421 HSQC= C15
H15B / 1     2.043940 1*1*1 STAT=Y PRED= 2.052 RANGE= 0.050 WIDTH(Y)= 3.826 RESP(Y)= 0.9264 HSQC= C15
H17A / 1     5.101198 1*1*1 STAT=Y PRED= 4.878 RANGE= 0.025 WIDTH(Y)= 2.222 RESP(Y)= 0.9638 HSQC= C17
H17B / 1     4.755346 1*1*1 STAT=Y PRED= 4.687 RANGE= 0.025 WIDTH(Y)= 2.510 RESP(Y)= 0.9720 HSQC= C17
H18B / 1     1.137551 1*1*3 STAT=Y PRED= 1.101 RANGE= 0.050 WIDTH(Y)= 2.685 RESP(Y)= 0.9314 HSQC= C18
H20B / 1     0.863457 1*1*3 STAT=Y PRED= 0.866 RANGE= 0.050 WIDTH(Y)= 3.381 RESP(Y)= 0.9416 HSQC= C20
GA1 / 1     5.264823 1*1*1 STAT=Y PRED= 5.565 RANGE= 0.342 WIDTH(Y)= 1.365 RESP(Y)= 0.9078 HSQC= H21
GA2 / 1     3.146291 1*1*1 STAT=Y PRED= 3.526 RANGE= 0.200 WIDTH(Y)= 1.588 RESP(Y)= 0.9171 HSQC= C23
GA3 / 1     3.228384 1*1*1 STAT=Y PRED= 3.317 RANGE= 0.155 WIDTH(Y)= 1.535 RESP(Y)= 0.8548 HSQC= C26
GA4 / 1     3.131530 1*1*1 STAT=Y PRED= 3.387 RANGE= 0.287 WIDTH(Y)= 1.571 RESP(Y)= 0.8374 HSQC= C27
GA5 / 1     3.179883 1*1*1 STAT=Y PRED= 3.485 RANGE= 0.247 WIDTH(Y)= 1.710 RESP(Y)= 0.8314 HSQC= C25
GA6A / 1     3.458827 1*1*1 STAT=Y PRED= 3.351 RANGE= 0.450 WIDTH(Y)= 1.979 RESP(Y)= 0.8318 HSQC= C29
GA6B / 1     3.626411 1*1*1 STAT=Y PRED= 3.509 RANGE= 0.232 WIDTH(Y)= 1.878 RESP(Y)= 0.8536 HSQC= C29
OGA2 / 1     5.180937 1*1*1 STAT=Y PRED= 5.633 RANGE= 1.215 WIDTH(Y)= 1.415 RESP(Y)= 0.8978
OGA3 / 1     5.007395 1*1*1 STAT=Y PRED= 4.296 RANGE= 1.420 WIDTH(Y)= 1.259 RESP(Y)= 0.8798
OGA4 / 1     4.978889 1*1*1 STAT=Y PRED= 4.702 RANGE= 1.565 WIDTH(Y)= 1.230 RESP(Y)= 0.8679
OGA6 / 1     4.469250 1*1*1 STAT=Y PRED= 5.633 RANGE= 1.215 WIDTH(Y)= 1.350 RESP(Y)= 0.8978
GB1 / 1     4.283265 1*1*1 STAT=Y PRED= 5.565 RANGE= 0.342 WIDTH(Y)= 1.903 RESP(Y)= 0.9078 HSQC= H21
GB2 / 1     2.925010 1*1*1 STAT=Y PRED= 3.526 RANGE= 0.200 WIDTH(Y)= 1.619 RESP(Y)= 0.9171 HSQC= C23
GB3 / 1     3.123025 1*1*1 STAT=Y PRED= 3.317 RANGE= 0.155 WIDTH(Y)= 1.422 RESP(Y)= 0.8548 HSQC= C26
GB4 / 1     3.012271 1*1*1 STAT=Y PRED= 3.387 RANGE= 0.287 WIDTH(Y)= 1.413 RESP(Y)= 0.8374 HSQC= C27
GB5 / 1     2.995722 1*1*1 STAT=Y PRED= 3.485 RANGE= 0.247 WIDTH(Y)= 1.648 RESP(Y)= 0.8314 HSQC= C25
GB6A / 1     3.401766 1*1*1 STAT=Y PRED= 3.351 RANGE= 0.450 WIDTH(Y)= 1.925 RESP(Y)= 0.8318 HSQC= C29
GB6B / 1     3.642221 1*1*1 STAT=Y PRED= 3.509 RANGE= 0.232 WIDTH(Y)= 1.850 RESP(Y)= 0.8536 HSQC= C29
OGB2 / 1     4.809909 1*1*1 STAT=Y PRED= 5.633 RANGE= 1.215 WIDTH(Y)= 1.236 RESP(Y)= 0.8978
OGB3 / 1     4.874621 1*1*1 STAT=Y PRED= 4.296 RANGE= 1.420 WIDTH(Y)= 1.222 RESP(Y)= 0.8798
OGB4 / 1     4.823855 1*1*1 STAT=Y PRED= 4.702 RANGE= 1.565 WIDTH(Y)= 1.197 RESP(Y)= 0.8679
OGB6 / 1     4.511059 1*1*1 STAT=Y PRED= 5.633 RANGE= 1.215 WIDTH(Y)= 1.486 RESP(Y)= 0.8978
DMSO_CH 2*SPIN= 1 SPECIES=1H      POPULATION(Y)= 0.84048
DMSO / 2     2.500013 1*1*1 STAT=Y PRED= 2.500 RANGE= 0.050 WIDTH(Y)= 1.329 RESP(Y)= 1.0000
DMSO_D 2*SPIN= 2 SPECIES=2D      POPULATION(Y)= 0.84048
DMSOD1 / 2  -100.000001 1*1*1 STAT=Y PRED= -99.999 RANGE= 0.050 WIDTH(Y)= 1.500 RESP(Y)= 1.0000
DMSOD2 / 2  -100.000001 1*1*1 STAT=Y PRED= -99.999 RANGE= 0.050 WIDTH(Y)= 1.500 RESP(Y)= 1.0000
WATER_H 2*SPIN= 1 SPECIES=1H      POPULATION(Y)= 0.09878
WATER / 3     3.331851 2*1*1 STAT=Y PRED= 3.338 RANGE= 0.050 WIDTH(Y)= 1.054 RESP(Y)= 1.0000
```

#### COUPLING CONSTANTS (HZ):

```
J12_13 -13.0235 J H1A H1B STAT=Y PRED= -13.130 RANGE= 1.500
J17_12 12.4391 J H1A H2A STAT=Y PRED= 12.550 RANGE= 2.560
J12_18 4.4872 J H1A H2B STAT=Y PRED= 4.380 RANGE= 3.800
J14_12 -0.0900 J H1A H20B STAT=Y PRED= -0.790 RANGE= 0.400
J17_13 4.2898 J H1B H2A STAT=Y PRED= 3.880 RANGE= 3.800
J13_18 3.5216 J H1B H2B STAT=Y PRED= 2.510 RANGE= 2.800
J13_19 1.2723 J H1B H3A STAT=Y PRED= 2.850 RANGE= 1.280
J17_18 -14.5339 J H2A H2B STAT=Y PRED= -13.190 RANGE= 1.500
J17_19 4.2070 J H2A H3A STAT=Y PRED= 3.860 RANGE= 3.800
J17_20 13.2983 J H2A H3B STAT=Y PRED= 12.570 RANGE= 2.560
J19_18 2.9948 J H2B H3A STAT=Y PRED= 2.530 RANGE= 2.800
J20_18 4.4682 J H2B H3B STAT=Y PRED= 4.310 RANGE= 3.800
J19_20 -13.3869 J H3A H3B STAT=Y PRED= -13.110 RANGE= 1.500
J21_22 12.2242 J H5A H6A STAT=Y PRED= 12.550 RANGE= 2.560
J21_23 2.0437 J H5A H6B STAT=Y PRED= 1.710 RANGE= 2.800
J22_23 -13.7595 J H6A H6B STAT=Y PRED= -13.190 RANGE= 1.500
J22_24 13.2560 J H6A H7A STAT=Y PRED= 12.990 RANGE= 2.560
J22_25 3.1808 J H6A H7B STAT=Y PRED= 3.320 RANGE= 3.800
J23_24 3.5762 J H6B H7A STAT=Y PRED= 3.410 RANGE= 3.800
```

|        |          |        |        |        |               |              |
|--------|----------|--------|--------|--------|---------------|--------------|
| J23_25 | 3.3625   | J H6B  | H7B    | STAT=Y | PRED= 3.190   | RANGE= 3.800 |
| J24_25 | -12.5210 | J H7A  | H7B    | STAT=Y | PRED= -13.130 | RANGE= 1.500 |
| J26_1  | 0.9766   | J H9A  | H11A   | STAT=Y | PRED= 0.490   | RANGE= 2.800 |
| J26_2  | 8.1506   | J H9A  | H11B   | STAT=Y | PRED= 9.030   | RANGE= 3.580 |
| J26_6  | 1.3973   | J H9A  | H14B   | STAT=Y | PRED= 2.290   | RANGE= 1.100 |
| J1_2   | -14.9148 | J H11A | H11B   | STAT=Y | PRED= -13.010 | RANGE= 1.500 |
| J3_1   | 2.1715   | J H11A | H12A   | STAT=Y | PRED= 1.040   | RANGE= 2.800 |
| J4_1   | 6.0170   | J H11A | H12B   | STAT=Y | PRED= 6.480   | RANGE= 3.800 |
| J3_2   | 6.7922   | J H11B | H12A   | STAT=Y | PRED= 6.890   | RANGE= 3.800 |
| J4_2   | 13.2688  | J H11B | H12B   | STAT=Y | PRED= 11.180  | RANGE= 2.800 |
| J3_4   | -11.6314 | J H12A | H12B   | STAT=Y | PRED= -12.880 | RANGE= 1.500 |
| J3_6   | 3.0553   | J H12A | H14B   | STAT=Y | PRED= 2.670   | RANGE= 1.280 |
| J5_6   | -11.3992 | J H14A | H14B   | STAT=Y | PRED= -12.450 | RANGE= 2.000 |
| J7_5   | 2.7447   | J H14A | H15A   | STAT=Y | PRED= 1.650   | RANGE= 1.280 |
| J7_8   | -16.8669 | J H15A | H15B   | STAT=Y | PRED= -14.390 | RANGE= 3.000 |
| J7_9   | -2.0728  | J H15A | H17A   | STAT=Y | PRED= -2.030  | RANGE= 1.000 |
| J7_10  | -1.5587  | J H15A | H17B   | STAT=Y | PRED= -1.900  | RANGE= 0.950 |
| J9_8   | -3.0038  | J H15B | H17A   | STAT=Y | PRED= -2.420  | RANGE= 1.200 |
| J10_8  | -2.3856  | J H15B | H17B   | STAT=Y | PRED= -2.140  | RANGE= 1.100 |
| J9_10  | 1.4829   | J H17A | H17B   | STAT=Y | PRED= 2.980   | RANGE= 4.000 |
| J38_40 | 8.2126   | J GA1  | GA2    | STAT=Y | PRED= 7.190   | RANGE= 3.580 |
| J40_43 | 9.1219   | J GA2  | GA3    | STAT=Y | PRED= 8.920   | RANGE= 3.580 |
| J40_48 | 5.7658   | J GA2  | OGA2   | STAT=Y | PRED= 4.300   | RANGE= 1.000 |
| J43_46 | 8.8137   | J GA3  | GA4    | STAT=Y | PRED= 9.140   | RANGE= 3.580 |
| J43_51 | 5.4074   | J GA3  | OGA3   | STAT=Y | PRED= 4.300   | RANGE= 1.000 |
| J41_46 | 9.7082   | J GA4  | GA5    | STAT=Y | PRED= 10.550  | RANGE= 2.560 |
| J46_52 | 5.5423   | J GA4  | OGA4   | STAT=Y | PRED= 4.300   | RANGE= 1.000 |
| J41_49 | 5.1855   | J GA5  | GA6A   | STAT=Y | PRED= 2.700   | RANGE= 3.000 |
| J41_50 | 2.1080   | J GA5  | GA6B   | STAT=Y | PRED= 1.280   | RANGE= 3.000 |
| J49_50 | -11.8253 | J GA6A | GA6B   | STAT=Y | PRED= -12.300 | RANGE= 0.800 |
| J49_51 | 5.9565   | J GA6A | OGA6   | STAT=Y | PRED= 4.300   | RANGE= 3.000 |
| J50_51 | 5.2830   | J GA6B | OGA6   | STAT=Y | PRED= 4.300   | RANGE= 3.000 |
| J48_50 | 7.7944   | J GB1  | GB2    | STAT=Y | PRED= 7.190   | RANGE= 3.580 |
| J50_53 | 8.9966   | J GB2  | GB3    | STAT=Y | PRED= 8.920   | RANGE= 3.580 |
| J50_58 | 5.0219   | J GB2  | OGB2   | STAT=Y | PRED= 4.300   | RANGE= 1.000 |
| J53_56 | 8.5238   | J GB3  | GB4    | STAT=Y | PRED= 9.140   | RANGE= 3.580 |
| J53_61 | 4.8856   | J GB3  | OGB3   | STAT=Y | PRED= 4.300   | RANGE= 1.000 |
| J51_56 | 9.7146   | J GB4  | GB5    | STAT=Y | PRED= 10.550  | RANGE= 2.560 |
| J56_62 | 5.2828   | J GB4  | OGB4   | STAT=Y | PRED= 4.300   | RANGE= 1.000 |
| J51_59 | 5.9679   | J GB5  | GB6A   | STAT=Y | PRED= 2.700   | RANGE= 3.000 |
| J51_60 | 2.2038   | J GB5  | GB6B   | STAT=Y | PRED= 1.280   | RANGE= 3.000 |
| J59_60 | -11.5869 | J GB6A | GB6B   | STAT=Y | PRED= -12.300 | RANGE= 0.800 |
| J59_61 | 6.0829   | J GB6A | OGB6   | STAT=Y | PRED= 4.300   | RANGE= 3.000 |
| J60_61 | 5.7661   | J GB6B | OGB6   | STAT=Y | PRED= 4.300   | RANGE= 3.000 |
| JDMSO1 | 1.7939   | J DMSO | DMSOD1 | STAT=Y | PRED= 1.700   | RANGE= 0.050 |
| JDMSO1 | 1.7939   | J DMSO | DMSOD2 | STAT=Y | PRED= 1.700   | RANGE= 0.050 |

CONTROL PARAMETERS:

Solvent = none (def. 99% enriched)  
 1.000 = Concentration (vol%, def=1.0%)  
 0.00100000 = Minimum line-intensity  
 0.00100000 = Diagonalization criterium (not in use)  
 600.12701400 = FIELD(1H,MHz), used to transform shifts to ppms  
 22.47832099 = Left frequency (ppm)  
 -7.49157654 = Right frequency (ppm)  
 0.000 = Acquisition time (s, for QMtls)  
 1.054 = Line-width (for modes D, P & T, 0=use defaults)  
 0.068609924 = Data-point resolution (Hz)  
 61.986 = GAUSSIAN (% , 0=use default from INF)  
 -5.939 = Dispersion contribution (% , 0=use default from INF)  
 0.00000000 = Decoupling frequency (for DORES)

CONSTRAINTS (in equations X0 = 1.0)...use no empty lines

EQUAL DMSOD1 = DMSOD2  
 1.000 \* 1.0 = -41.020 \* 1.0 - 1.000 \* 1.0  
 10.000 \* 1.0 = -38.340 \* 1.0 - 1.000 \* 1.0  
 11.000 \* 1.0 = -16.670 \* 1.0 - 1.000 \* 1.0  
 12.000 \* 1.0 = -36.870 \* 1.0 - 1.000 \* 1.0  
 13.000 \* 1.0 = -80.200 \* 1.0 - 1.000 \* 1.0  
 14.000 \* 1.0 = -49.010 \* 1.0 - 1.000 \* 1.0  
 15.000 \* 1.0 = -48.090 \* 1.0 - 1.000 \* 1.0  
 16.0 \* 1.0 = -153.1 \* 1.0 - 1.0 \* 1.0  
 17.0 \* 1.0 = -104.2 \* 1.0 - 1.0 \* 1.0  
 18.000 \* 1.0 = -28.210 \* 1.0 - 1.000 \* 1.0  
 19.0 \* 1.0 = -185.4 \* 1.0 - 1.0 \* 1.0  
 2.000 \* 1.0 = -19.040 \* 1.0 - 1.000 \* 1.0  
 20.000 \* 1.0 = -14.770 \* 1.0 - 1.000 \* 1.0  
 3.000 \* 1.0 = -37.520 \* 1.0 - 1.000 \* 1.0  
 4.000 \* 1.0 = -43.240 \* 1.0 - 1.000 \* 1.0  
 5.000 \* 1.0 = -55.060 \* 1.0 - 1.000 \* 1.0  
 6.000 \* 1.0 = -21.840 \* 1.0 - 1.000 \* 1.0  
 7.000 \* 1.0 = -40.820 \* 1.0 - 1.000 \* 1.0  
 8.000 \* 1.0 = -42.640 \* 1.0 - 1.000 \* 1.0  
 9.000 \* 1.0 = -55.850 \* 1.0 - 1.000 \* 1.0

END of FILE

**S4.** The  $^1\text{H}$  fingerprint of rubusoside (**2**) in  $\text{DMSO-}d_6$  (21 mM, 600 MHz, 298 K). The calculated and observed NMR spectra are shown in red and blue, respectively.

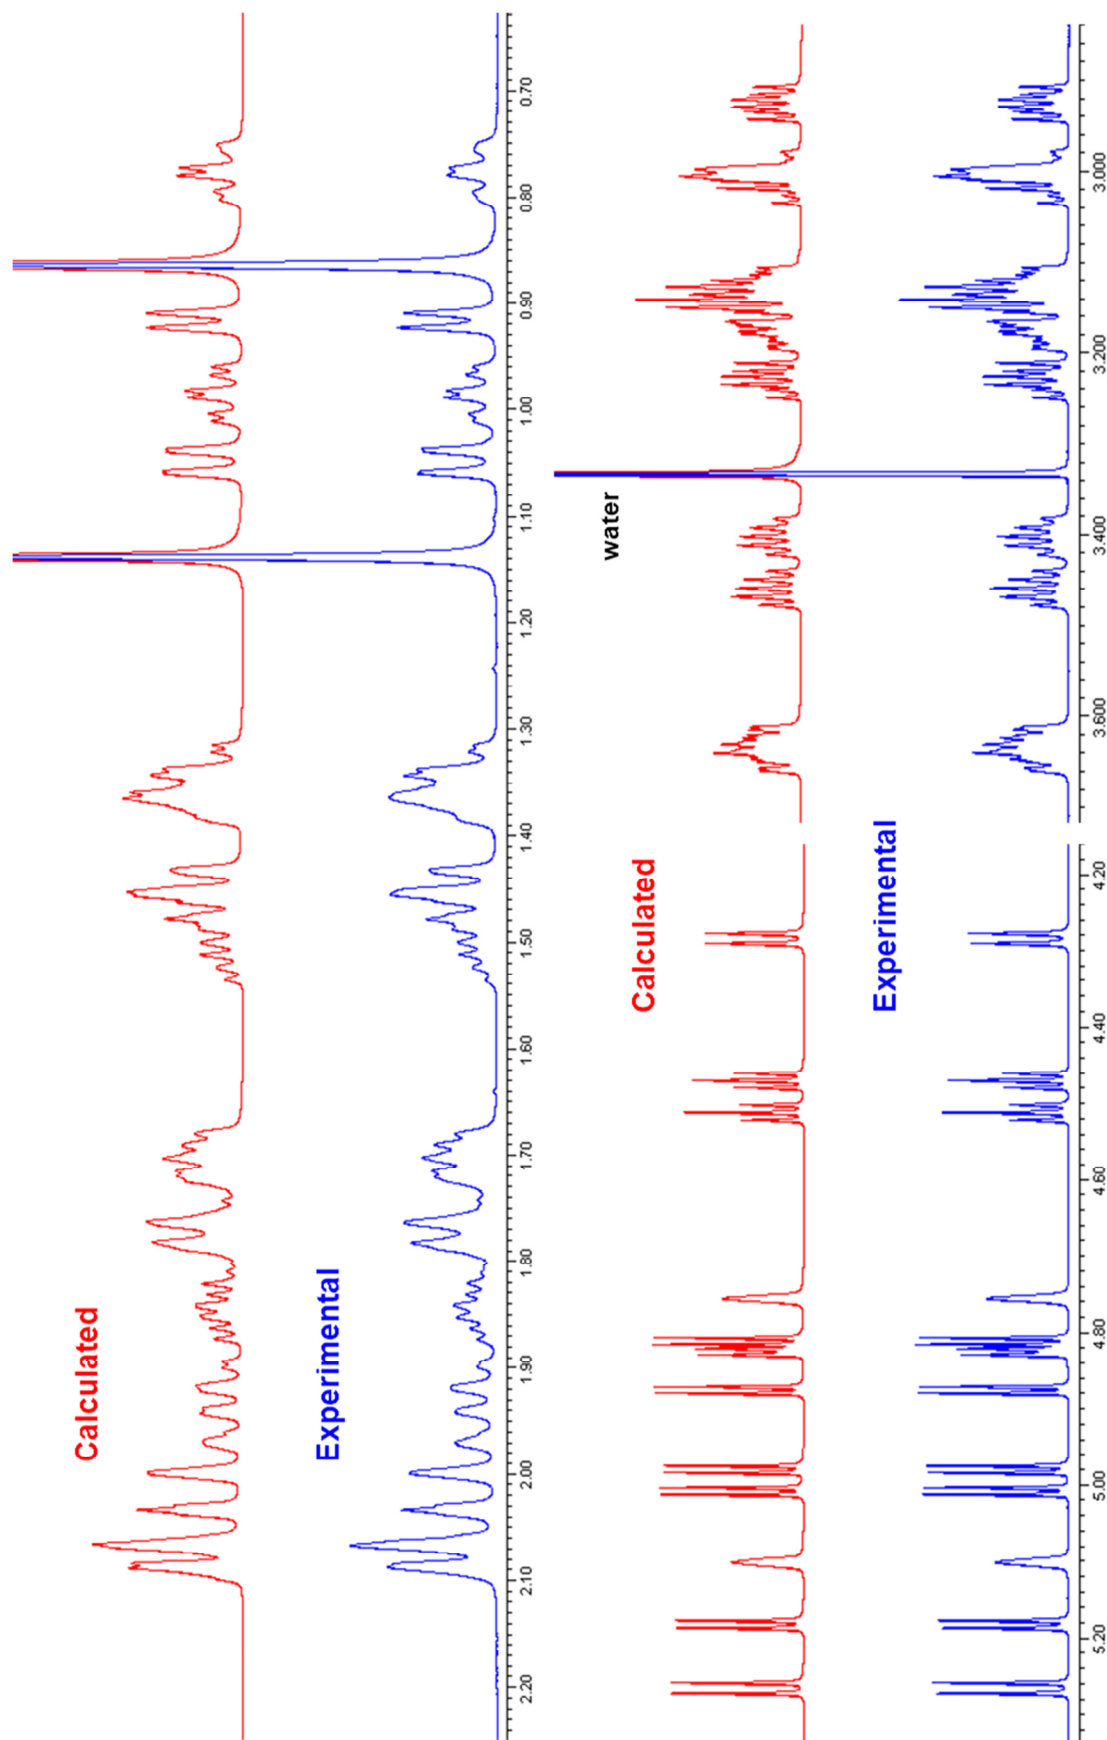



## 55. The HiFSA profile of steviolbioside (3) in DMSO-*d*<sub>6</sub> [in PERCH parameter (.pms) file format].

\* NEW: the lines beginning by \* are comment lines !  
 \* To keep all the chemical shifts fixed during iteration  
 \* replace "CHEMICAL SHIFTS(HZ):" by "..SHIFTS(HZ): fixed"  
 \* The couplings can be fixed in the same way

NMR-data: c:\HIFSA\Stevia\Steviolbioside  
 #Date 10.10.2014; Time 21:40:59 stbioside.pms

```
CHEMICAL SHIFTS (PPM) :
PROTON      2*SPIN= 1 SPECIES=1H      POPULATION(Y)= 0.07934
H1A / 1      0.773484 1*1*1  STAT=Y  PRED= 0.779 RANGE= 0.050 WIDTH(Y)= 3.942 RESP(Y)= 0.9579 HSQC= C1
H1B / 1      1.785719 1*1*1  STAT=Y  PRED= 1.778 RANGE= 0.050 WIDTH(Y)= 3.999 RESP(Y)= 0.9901 HSQC= C1
H2A / 1      1.773902 1*1*1  STAT=Y  PRED= 1.764 RANGE= 0.050 WIDTH(Y)= 3.926 RESP(Y)= 0.9034 HSQC= C2
H2B / 1      1.338300 1*1*1  STAT=Y  PRED= 1.332 RANGE= 0.050 WIDTH(Y)= 2.997 RESP(Y)= 0.9269 HSQC= C2
H3A / 1      2.005316 1*1*1  STAT=Y  PRED= 2.000 RANGE= 0.050 WIDTH(Y)= 3.037 RESP(Y)= 0.9312 HSQC= C3
H3B / 1      0.925708 1*1*1  STAT=Y  PRED= 0.932 RANGE= 0.050 WIDTH(Y)= 3.240 RESP(Y)= 0.9292 HSQC= C3
H5A / 1      0.999349 1*1*1  STAT=Y  PRED= 1.015 RANGE= 0.050 WIDTH(Y)= 3.142 RESP(Y)= 0.9664 HSQC= C5
H6A / 1      1.714163 1*1*1  STAT=Y  PRED= 1.700 RANGE= 0.050 WIDTH(Y)= 4.661 RESP(Y)= 0.9192 HSQC= C6
H6B / 1      1.735628 1*1*1  STAT=Y  PRED= 1.737 RANGE= 0.050 WIDTH(Y)= 4.631 RESP(Y)= 0.9360 HSQC= C6
H7A / 1      1.356818 1*1*1  STAT=Y  PRED= 1.360 RANGE= 0.050 WIDTH(Y)= 3.867 RESP(Y)= 0.9031 HSQC= C7
H7B / 1      1.476010 1*1*1  STAT=Y  PRED= 1.449 RANGE= 0.050 WIDTH(Y)= 3.866 RESP(Y)= 0.9915 HSQC= C7
H9A / 1      0.922105 1*1*1  STAT=Y  PRED= 0.921 RANGE= 0.050 WIDTH(Y)= 3.918 RESP(Y)= 0.9761 HSQC= C9
H11A / 1     1.708713 1*1*1  STAT=Y  PRED= 1.651 RANGE= 0.050 WIDTH(Y)= 4.106 RESP(Y)= 0.9509 HSQC= C11
H11B / 1     1.495189 1*1*1  STAT=Y  PRED= 1.429 RANGE= 0.050 WIDTH(Y)= 4.091 RESP(Y)= 0.9007 HSQC= C11
H12A / 1     1.485211 1*1*1  STAT=Y  PRED= 1.348 RANGE= 0.025 WIDTH(Y)= 3.898 RESP(Y)= 1.0000 HSQC= C12
H12B / 1     1.852108 1*1*1  STAT=Y  PRED= 1.599 RANGE= 0.050 WIDTH(Y)= 3.801 RESP(Y)= 0.9451 HSQC= C12
H14A / 1     2.092207 1*1*1  STAT=Y  PRED= 1.869 RANGE= 0.455 WIDTH(Y)= 3.957 RESP(Y)= 0.9685 HSQC= C14
H14B / 1     1.383991 1*1*1  STAT=Y  PRED= 1.192 RANGE= 0.050 WIDTH(Y)= 3.678 RESP(Y)= 0.9764 HSQC= C14
H15A / 1     1.981506 1*1*1  STAT=Y  PRED= 2.023 RANGE= 0.050 WIDTH(Y)= 4.297 RESP(Y)= 0.9421 HSQC= C15
H15B / 1     2.045497 1*1*1  STAT=Y  PRED= 2.052 RANGE= 0.050 WIDTH(Y)= 3.345 RESP(Y)= 0.9264 HSQC= C15
H17A / 1     5.085833 1*1*1  STAT=Y  PRED= 4.878 RANGE= 0.025 WIDTH(Y)= 3.167 RESP(Y)= 0.9638 HSQC= C17
H17B / 1     4.738841 1*1*1  STAT=Y  PRED= 4.687 RANGE= 0.025 WIDTH(Y)= 3.373 RESP(Y)= 0.9720 HSQC= C17
H18B / 1     1.100806 1*1*3  STAT=Y  PRED= 1.101 RANGE= 0.050 WIDTH(Y)= 2.608 RESP(Y)= 0.9314 HSQC= C18
H20B / 1     0.873701 1*1*3  STAT=Y  PRED= 0.866 RANGE= 0.050 WIDTH(Y)= 3.031 RESP(Y)= 0.9416 HSQC= C20
H22A / 1     11.968541 1*1*1  STAT=Y  PRED= 11.981 RANGE= 0.050 WIDTH(Y)= 13.870 RESP(Y)= 0.7926
GB1 / 1      4.476335 1*1*1  STAT=Y  PRED= 5.565 RANGE= 0.342 WIDTH(Y)= 1.934 RESP(Y)= 0.9078 HSQC= H21
GB2 / 1      3.218335 1*1*1  STAT=Y  PRED= 3.526 RANGE= 0.200 WIDTH(Y)= 1.888 RESP(Y)= 0.9171 HSQC= C23
GB3 / 1      3.373393 1*1*1  STAT=Y  PRED= 3.317 RANGE= 0.155 WIDTH(Y)= 1.749 RESP(Y)= 0.8548 HSQC= C26
GB4 / 1      3.115594 1*1*1  STAT=Y  PRED= 3.387 RANGE= 0.287 WIDTH(Y)= 2.138 RESP(Y)= 0.8374 HSQC= C27
GB5 / 1      3.049840 1*1*1  STAT=Y  PRED= 3.485 RANGE= 0.247 WIDTH(Y)= 1.675 RESP(Y)= 0.8314 HSQC= C25
GB6A / 1     3.421340 1*1*1  STAT=Y  PRED= 3.351 RANGE= 0.450 WIDTH(Y)= 2.189 RESP(Y)= 0.8318 HSQC= C29
GB6B / 1     3.584396 1*1*1  STAT=Y  PRED= 3.509 RANGE= 0.232 WIDTH(Y)= 2.147 RESP(Y)= 0.8536 HSQC= C29
OGB3 / 1     5.628372 1*1*1  STAT=Y  PRED= 4.296 RANGE= 1.420 WIDTH(Y)= 1.678 RESP(Y)= 0.8798
OGB4 / 1     4.991140 1*1*1  STAT=Y  PRED= 4.702 RANGE= 1.565 WIDTH(Y)= 1.664 RESP(Y)= 0.8679
OGB6 / 1     4.358285 1*1*1  STAT=Y  PRED= 5.633 RANGE= 1.215 WIDTH(Y)= 1.773 RESP(Y)= 0.8978
GC1 / 1      4.365661 1*1*1  STAT=Y  PRED= 5.565 RANGE= 0.342 WIDTH(Y)= 1.705 RESP(Y)= 0.9078 HSQC= H21
GC2 / 1      2.992140 1*1*1  STAT=Y  PRED= 3.526 RANGE= 0.200 WIDTH(Y)= 1.771 RESP(Y)= 0.9171 HSQC= C23
GC3 / 1      3.161501 1*1*1  STAT=Y  PRED= 3.317 RANGE= 0.155 WIDTH(Y)= 2.500 RESP(Y)= 0.8548 HSQC= C26
GC4 / 1      3.115303 1*1*1  STAT=Y  PRED= 3.387 RANGE= 0.287 WIDTH(Y)= 3.989 RESP(Y)= 0.8374 HSQC= C27
GC5 / 1      3.055040 1*1*1  STAT=Y  PRED= 3.485 RANGE= 0.247 WIDTH(Y)= 1.715 RESP(Y)= 0.8314 HSQC= C25
GC6A / 1     3.472896 1*1*1  STAT=Y  PRED= 3.351 RANGE= 0.450 WIDTH(Y)= 2.776 RESP(Y)= 0.8318 HSQC= C29
GC6B / 1     3.595517 1*1*1  STAT=Y  PRED= 3.509 RANGE= 0.232 WIDTH(Y)= 2.394 RESP(Y)= 0.8536 HSQC= C29
OGC2 / 1     5.380007 1*1*1  STAT=Y  PRED= 5.633 RANGE= 1.215 WIDTH(Y)= 1.594 RESP(Y)= 0.8978
OGC3 / 1     4.945101 1*1*1  STAT=Y  PRED= 4.296 RANGE= 1.420 WIDTH(Y)= 10.140 RESP(Y)= 0.8798
OGC4 / 1     4.846038 1*1*1  STAT=Y  PRED= 4.702 RANGE= 1.565 WIDTH(Y)= 4.627 RESP(Y)= 0.8679
OGC6 / 1     4.161324 1*1*1  STAT=Y  PRED= 5.633 RANGE= 1.215 WIDTH(Y)= 3.522 RESP(Y)= 0.8978
DMSO_CH 2*SPIN= 1 SPECIES=1H      POPULATION(Y)= 0.76526
DMSO / 2      2.500023 1*1*1  STAT=Y  PRED= 2.500 RANGE= 0.050 WIDTH(Y)= 1.305 RESP(Y)= 1.0000
DMSO_D 2*SPIN= 2 SPECIES=2D      POPULATION(Y)= 0.76526
DMSOD1 / 2   -100.000001 1*1*1  STAT=Y  PRED= -99.999 RANGE= 0.050 WIDTH(Y)= 1.500 RESP(Y)= 1.0000
DMSOD2 / 2   -100.000001 1*1*1  STAT=Y  PRED= -99.999 RANGE= 0.050 WIDTH(Y)= 1.500 RESP(Y)= 1.0000
WATER_H 2*SPIN= 1 SPECIES=1H      POPULATION(Y)= 0.15540
WATER / 3     3.337174 2*1*1  STAT=Y  PRED= 3.338 RANGE= 0.050 WIDTH(Y)= 1.395 RESP(Y)= 1.0000
```

```
COUPLING CONSTANTS (HZ) :
J12_13 -12.6475 J H1A H1B STAT=Y PRED= -13.130 RANGE= 1.500
J17_12 13.6691 J H1A H2A STAT=Y PRED= 12.550 RANGE= 2.560
J12_18 4.4431 J H1A H2B STAT=Y PRED= 4.380 RANGE= 3.800
J14_12 -0.0592 J H1A H20B STAT=Y PRED= -0.790 RANGE= 0.400
J17_13 4.0016 J H1B H2A STAT=Y PRED= 3.880 RANGE= 3.800
J13_18 2.4597 J H1B H2B STAT=Y PRED= 2.510 RANGE= 2.800
J13_19 1.2827 J H1B H3A STAT=Y PRED= 2.850 RANGE= 1.280
J17_18 -13.3639 J H2A H2B STAT=Y PRED= -13.190 RANGE= 1.500
J17_19 3.5753 J H2A H3A STAT=Y PRED= 3.860 RANGE= 3.800
J17_20 13.3956 J H2A H3B STAT=Y PRED= 12.570 RANGE= 2.560
J19_18 2.8951 J H2B H3A STAT=Y PRED= 2.530 RANGE= 2.800
J20_18 4.3377 J H2B H3B STAT=Y PRED= 4.310 RANGE= 3.800
J19_20 -13.2039 J H3A H3B STAT=Y PRED= -13.110 RANGE= 1.500
J21_22 11.7402 J H5A H6A STAT=Y PRED= 12.550 RANGE= 2.560
J21_23 2.4962 J H5A H6B STAT=Y PRED= 1.710 RANGE= 2.800
J22_23 -14.0207 J H6A H6B STAT=Y PRED= -13.190 RANGE= 1.500
J22_24 13.4288 J H6A H7A STAT=Y PRED= 12.990 RANGE= 2.560
J22_25 3.3044 J H6A H7B STAT=Y PRED= 3.320 RANGE= 3.800
J23_24 3.9790 J H6B H7A STAT=Y PRED= 3.410 RANGE= 3.800
```

|        |          |        |        |        |               |              |
|--------|----------|--------|--------|--------|---------------|--------------|
| J23_25 | 3.3795   | J H6B  | H7B    | STAT=Y | PRED= 3.190   | RANGE= 3.800 |
| J24_25 | -12.7987 | J H7A  | H7B    | STAT=Y | PRED= -13.130 | RANGE= 1.500 |
| J26_1  | 0.2816   | J H9A  | H11A   | STAT=Y | PRED= 0.490   | RANGE= 2.800 |
| J26_2  | 8.4095   | J H9A  | H11B   | STAT=Y | PRED= 9.030   | RANGE= 3.580 |
| J26_6  | 0.7262   | J H9A  | H14B   | STAT=Y | PRED= 2.290   | RANGE= 1.100 |
| J1_2   | -15.0638 | J H11A | H11B   | STAT=Y | PRED= -13.010 | RANGE= 1.500 |
| J3_1   | 1.4968   | J H11A | H12A   | STAT=Y | PRED= 1.040   | RANGE= 2.800 |
| J4_1   | 6.1771   | J H11A | H12B   | STAT=Y | PRED= 6.480   | RANGE= 3.800 |
| J3_2   | 6.8540   | J H11B | H12A   | STAT=Y | PRED= 6.890   | RANGE= 3.800 |
| J4_2   | 13.5666  | J H11B | H12B   | STAT=Y | PRED= 11.180  | RANGE= 2.800 |
| J3_4   | -11.5390 | J H12A | H12B   | STAT=Y | PRED= -12.880 | RANGE= 1.500 |
| J3_6   | 2.4311   | J H12A | H14B   | STAT=Y | PRED= 2.670   | RANGE= 1.280 |
| J5_6   | -11.3584 | J H14A | H14B   | STAT=Y | PRED= -12.450 | RANGE= 2.000 |
| J7_5   | 2.5079   | J H14A | H15A   | STAT=Y | PRED= 1.650   | RANGE= 1.280 |
| J7_8   | -16.9773 | J H15A | H15B   | STAT=Y | PRED= -14.390 | RANGE= 3.000 |
| J7_9   | -1.6991  | J H15A | H17A   | STAT=Y | PRED= -2.030  | RANGE= 1.000 |
| J7_10  | -0.0344  | J H15A | H17B   | STAT=Y | PRED= -1.900  | RANGE= 0.950 |
| J9_8   | -2.9622  | J H15B | H17A   | STAT=Y | PRED= -2.420  | RANGE= 1.200 |
| J10_8  | -2.4830  | J H15B | H17B   | STAT=Y | PRED= -2.140  | RANGE= 1.100 |
| J9_10  | 0.3184   | J H17A | H17B   | STAT=Y | PRED= 2.980   | RANGE= 4.000 |
| J48_50 | 7.7027   | J GB1  | GB2    | STAT=Y | PRED= 7.190   | RANGE= 3.580 |
| J50_53 | 9.2232   | J GB2  | GB3    | STAT=Y | PRED= 8.920   | RANGE= 3.580 |
| J53_56 | 8.7747   | J GB3  | GB4    | STAT=Y | PRED= 9.140   | RANGE= 3.580 |
| J53_61 | 3.6786   | J GB3  | OGB3   | STAT=Y | PRED= 4.300   | RANGE= 1.000 |
| J51_56 | 9.6618   | J GB4  | GB5    | STAT=Y | PRED= 10.550  | RANGE= 2.560 |
| J56_62 | 5.6305   | J GB4  | OGB4   | STAT=Y | PRED= 4.300   | RANGE= 1.000 |
| J51_59 | 5.5281   | J GB5  | GB6A   | STAT=Y | PRED= 2.700   | RANGE= 3.000 |
| J51_60 | 2.3008   | J GB5  | GB6B   | STAT=Y | PRED= 1.280   | RANGE= 3.000 |
| J59_60 | -11.6534 | J GB6A | GB6B   | STAT=Y | PRED= -12.300 | RANGE= 0.800 |
| J59_61 | 6.2549   | J GB6A | OGB6   | STAT=Y | PRED= 4.300   | RANGE= 3.000 |
| J60_61 | 5.5488   | J GB6B | OGB6   | STAT=Y | PRED= 4.300   | RANGE= 3.000 |
| J58_60 | 7.7985   | J GC1  | GC2    | STAT=Y | PRED= 7.190   | RANGE= 3.580 |
| J60_63 | 9.0525   | J GC2  | GC3    | STAT=Y | PRED= 8.920   | RANGE= 3.580 |
| J60_68 | 3.3742   | J GC2  | OGC2   | STAT=Y | PRED= 4.300   | RANGE= 1.000 |
| J63_66 | 2.1457   | J GC3  | GC4    | STAT=Y | PRED= 9.140   | RANGE= 3.580 |
| J63_71 | 7.6649   | J GC3  | OGC3   | STAT=Y | PRED= 4.300   | RANGE= 1.000 |
| J61_66 | 9.3298   | J GC4  | GC5    | STAT=Y | PRED= 10.550  | RANGE= 2.560 |
| J66_72 | 5.3605   | J GC4  | OGC4   | STAT=Y | PRED= 4.300   | RANGE= 1.000 |
| J61_69 | 4.5195   | J GC5  | GC6A   | STAT=Y | PRED= 2.700   | RANGE= 3.000 |
| J61_70 | 2.5522   | J GC5  | GC6B   | STAT=Y | PRED= 1.280   | RANGE= 3.000 |
| J69_70 | -11.3319 | J GC6A | GC6B   | STAT=Y | PRED= -12.300 | RANGE= 0.800 |
| J69_71 | 5.9254   | J GC6A | OGC6   | STAT=Y | PRED= 4.300   | RANGE= 3.000 |
| J70_71 | 4.8659   | J GC6B | OGC6   | STAT=Y | PRED= 4.300   | RANGE= 3.000 |
| JDMSO1 | 1.7939   | J DMSO | DMSOD1 | STAT=Y | PRED= 1.700   | RANGE= 0.050 |
| JDMSO1 | 1.7939   | J DMSO | DMSOD2 | STAT=Y | PRED= 1.700   | RANGE= 0.050 |

CONTROL PARAMETERS:

Solvent = none (def. 99% enriched)  
1.000 = Concentration (vol%, def=1.0%)  
0.00100000 = Minimum line-intensity  
0.00100000 = Diagonalization criterium (not in use)  
600.12701400 = FIELD(1H,MHz), used to transform shifts to ppms  
22.47832099 = Left frequency (ppm)  
-7.49157654 = Right frequency (ppm)  
0.000 = Acquisition time (s, for QMtls)  
1.300 = Line-width (for modes D, P & T, 0=use defaults)  
0.068609924 = Data-point resolution (Hz)  
41.849 = GAUSSIAN (% , 0=use default from INF)  
-2.243 = Dispersion contribution (% , 0=use default from INF)  
0.00000000 = Decoupling frequency (for DORES)

CONSTRAINTS (in equations X0 = 1.0)...use no empty lines

EQUAL DMSOD1 = DMSOD2  
1.000 \* 1.0 = -41.020 \* 1.0 - 1.000 \* 1.0  
10.000 \* 1.0 = -38.340 \* 1.0 - 1.000 \* 1.0  
11.000 \* 1.0 = -16.670 \* 1.0 - 1.000 \* 1.0  
12.000 \* 1.0 = -36.870 \* 1.0 - 1.000 \* 1.0  
13.000 \* 1.0 = -80.200 \* 1.0 - 1.000 \* 1.0  
14.000 \* 1.0 = -49.010 \* 1.0 - 1.000 \* 1.0  
15.000 \* 1.0 = -48.090 \* 1.0 - 1.000 \* 1.0  
16.0 \* 1.0 = -153.1 \* 1.0 - 1.0 \* 1.0  
17.0 \* 1.0 = -104.2 \* 1.0 - 1.0 \* 1.0  
18.000 \* 1.0 = -28.210 \* 1.0 - 1.000 \* 1.0  
19.0 \* 1.0 = -185.4 \* 1.0 - 1.0 \* 1.0  
2.000 \* 1.0 = -19.040 \* 1.0 - 1.000 \* 1.0  
20.000 \* 1.0 = -14.770 \* 1.0 - 1.000 \* 1.0  
3.000 \* 1.0 = -37.520 \* 1.0 - 1.000 \* 1.0  
4.000 \* 1.0 = -43.240 \* 1.0 - 1.000 \* 1.0  
5.000 \* 1.0 = -55.060 \* 1.0 - 1.000 \* 1.0  
6.000 \* 1.0 = -21.840 \* 1.0 - 1.000 \* 1.0  
7.000 \* 1.0 = -40.820 \* 1.0 - 1.000 \* 1.0  
8.000 \* 1.0 = -42.640 \* 1.0 - 1.000 \* 1.0  
9.000 \* 1.0 = -55.850 \* 1.0 - 1.000 \* 1.0

END of FILE

**S6.** The  $^1\text{H}$  fingerprint of steviolbioside (**3**) in  $\text{DMSO-}d_6$  (20 mM, 600 MHz, 298 K). The calculated and observed NMR spectra are shown in red and blue, respectively.

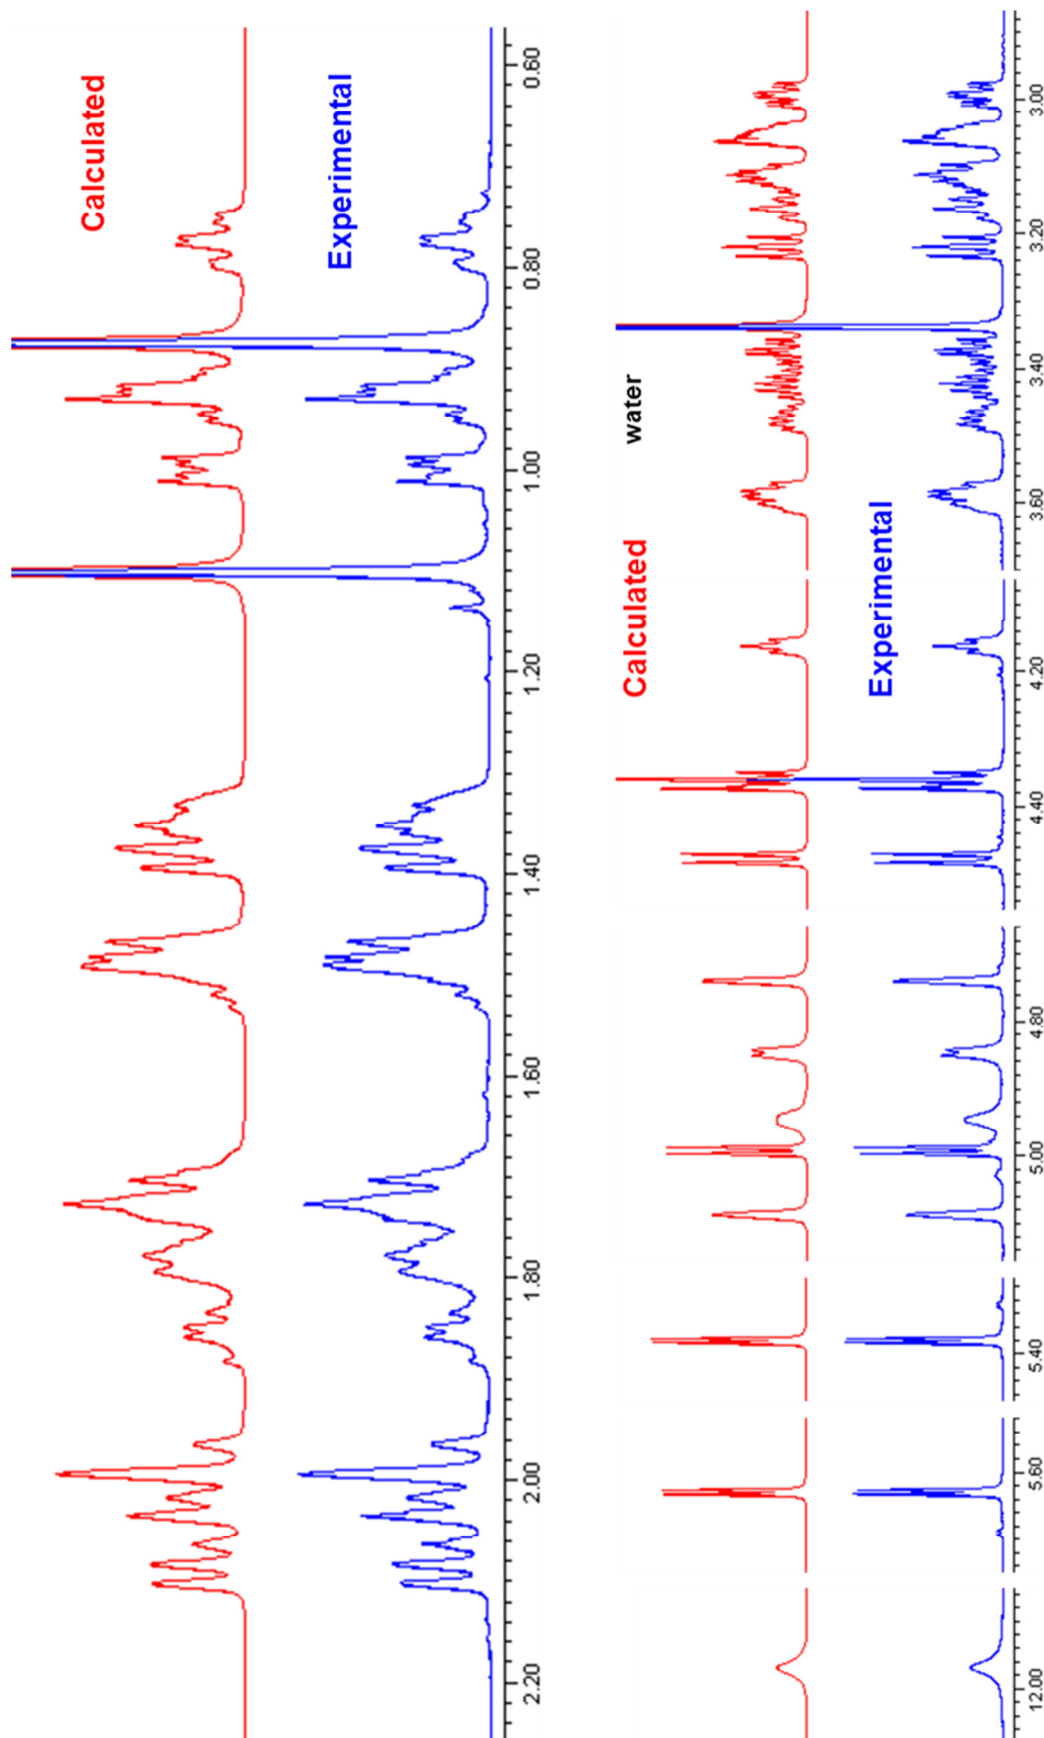

## 57. The HiFSA profile of stevioside (4) in DMSO-*d*<sub>6</sub> [in PERCH parameter (.pms) file format].

\* NEW: the lines beginning by \* are comment lines !  
 \* To keep all the chemical shifts fixed during iteration  
 \* replace "CHEMICAL SHIFTS(HZ):" by "...SHIFTS(HZ): fixed"  
 \* The couplings can be fixed in the same way

NMR-data: c:\HIFSA\Stevia\Stevioside  
 #\$\$ Date 10.10.2014; Time 21:48:44 stevioside.pms

### CHEMICAL SHIFTS (PPM):

```

PROTON      2*SPIN= 1 SPECIES=1H      POPULATION(Y)= 0.04678
H1A / 1      0.775034 1*1*1      STAT=Y      PRED= 0.779 RANGE= 0.050 WIDTH(Y)= 4.815 RESP(Y)= 0.9579 HSQC= C1
H1B / 1      1.768496 1*1*1      STAT=Y      PRED= 1.778 RANGE= 0.050 WIDTH(Y)= 4.470 RESP(Y)= 0.9901 HSQC= C1
H2A / 1      1.784287 1*1*1      STAT=Y      PRED= 1.764 RANGE= 0.050 WIDTH(Y)= 4.116 RESP(Y)= 0.9034 HSQC= C2
H2B / 1      1.356217 1*1*1      STAT=Y      PRED= 1.332 RANGE= 0.050 WIDTH(Y)= 2.908 RESP(Y)= 0.9269 HSQC= C2
H3A / 1      2.064530 1*1*1      STAT=Y      PRED= 2.000 RANGE= 0.050 WIDTH(Y)= 3.018 RESP(Y)= 0.9312 HSQC= C3
H3B / 1      0.985321 1*1*1      STAT=Y      PRED= 0.932 RANGE= 0.050 WIDTH(Y)= 3.886 RESP(Y)= 0.9292 HSQC= C3
H5A / 1      1.043786 1*1*1      STAT=Y      PRED= 1.015 RANGE= 0.050 WIDTH(Y)= 4.749 RESP(Y)= 0.9664 HSQC= C5
H6A / 1      1.952114 1*1*1      STAT=Y      PRED= 1.700 RANGE= 0.050 WIDTH(Y)= 4.653 RESP(Y)= 0.9192 HSQC= C6
H6B / 1      1.698740 1*1*1      STAT=Y      PRED= 1.737 RANGE= 0.050 WIDTH(Y)= 4.033 RESP(Y)= 0.9360 HSQC= C6
H7A / 1      1.336931 1*1*1      STAT=Y      PRED= 1.360 RANGE= 0.050 WIDTH(Y)= 4.040 RESP(Y)= 0.9031 HSQC= C7
H7B / 1      1.467720 1*1*1      STAT=Y      PRED= 1.449 RANGE= 0.050 WIDTH(Y)= 4.421 RESP(Y)= 0.9915 HSQC= C7
H9A / 1      0.904152 1*1*1      STAT=Y      PRED= 0.921 RANGE= 0.050 WIDTH(Y)= 3.979 RESP(Y)= 0.9761 HSQC= C9
H11A / 1     1.695460 1*1*1      STAT=Y      PRED= 1.651 RANGE= 0.050 WIDTH(Y)= 3.665 RESP(Y)= 0.9509 HSQC= C11
H11B / 1     1.486654 1*1*1      STAT=Y      PRED= 1.429 RANGE= 0.050 WIDTH(Y)= 4.335 RESP(Y)= 0.9007 HSQC= C11
H12A / 1     1.480885 1*1*1      STAT=Y      PRED= 1.348 RANGE= 0.025 WIDTH(Y)= 3.872 RESP(Y)= 1.0000 HSQC= C12
H12B / 1     1.859577 1*1*1      STAT=Y      PRED= 1.599 RANGE= 0.050 WIDTH(Y)= 4.397 RESP(Y)= 0.9451 HSQC= C12
H14A / 1     2.145290 1*1*1      STAT=Y      PRED= 1.869 RANGE= 0.455 WIDTH(Y)= 4.459 RESP(Y)= 0.9685 HSQC= C14
H14B / 1     1.381448 1*1*1      STAT=Y      PRED= 1.192 RANGE= 0.050 WIDTH(Y)= 4.278 RESP(Y)= 0.9764 HSQC= C14
H15A / 1     1.977729 1*1*1      STAT=Y      PRED= 2.023 RANGE= 0.050 WIDTH(Y)= 4.473 RESP(Y)= 0.9421 HSQC= C15
H15B / 1     2.027777 1*1*1      STAT=Y      PRED= 2.052 RANGE= 0.050 WIDTH(Y)= 3.491 RESP(Y)= 0.9264 HSQC= C15
H17A / 1     5.028963 1*1*1      STAT=Y      PRED= 4.878 RANGE= 0.025 WIDTH(Y)= 3.045 RESP(Y)= 0.9638 HSQC= C17
H17B / 1     4.717779 1*1*1      STAT=Y      PRED= 4.687 RANGE= 0.025 WIDTH(Y)= 3.834 RESP(Y)= 0.9720 HSQC= C17
H18B / 1     1.135823 1*1*3      STAT=Y      PRED= 1.101 RANGE= 0.050 WIDTH(Y)= 3.257 RESP(Y)= 0.9314 HSQC= C18
H20B / 1     0.866757 1*1*3      STAT=Y      PRED= 0.866 RANGE= 0.050 WIDTH(Y)= 4.029 RESP(Y)= 0.9416 HSQC= C20
GA1 / 1     5.250753 1*1*1      STAT=Y      PRED= 5.565 RANGE= 0.342 WIDTH(Y)= 1.692 RESP(Y)= 0.9078 HSQC= H21
GA2 / 1     3.146778 1*1*1      STAT=Y      PRED= 3.526 RANGE= 0.200 WIDTH(Y)= 1.803 RESP(Y)= 0.9171 HSQC= C23
GA3 / 1     3.237184 1*1*1      STAT=Y      PRED= 3.317 RANGE= 0.155 WIDTH(Y)= 1.970 RESP(Y)= 0.8548 HSQC= C26
GA4 / 1     3.136206 1*1*1      STAT=Y      PRED= 3.387 RANGE= 0.287 WIDTH(Y)= 1.797 RESP(Y)= 0.8374 HSQC= C27
GA5 / 1     3.182600 1*1*1      STAT=Y      PRED= 3.485 RANGE= 0.247 WIDTH(Y)= 2.811 RESP(Y)= 0.8314 HSQC= C25
GA6A / 1     3.461519 1*1*1      STAT=Y      PRED= 3.351 RANGE= 0.450 WIDTH(Y)= 2.385 RESP(Y)= 0.8318 HSQC= C29
GA6B / 1     3.626204 1*1*1      STAT=Y      PRED= 3.509 RANGE= 0.232 WIDTH(Y)= 2.319 RESP(Y)= 0.8536 HSQC= C29
OGA2 / 1     5.231801 1*1*1      STAT=Y      PRED= 5.633 RANGE= 1.215 WIDTH(Y)= 1.882 RESP(Y)= 0.8978
OGA3 / 1     4.984790 1*1*1      STAT=Y      PRED= 4.296 RANGE= 1.420 WIDTH(Y)= 1.574 RESP(Y)= 0.8798
OGA4 / 1     4.981474 1*1*1      STAT=Y      PRED= 4.702 RANGE= 1.565 WIDTH(Y)= 1.531 RESP(Y)= 0.8679
OGA6 / 1     4.486798 1*1*1      STAT=Y      PRED= 5.633 RANGE= 1.215 WIDTH(Y)= 1.671 RESP(Y)= 0.8978
GB1 / 1     4.451005 1*1*1      STAT=Y      PRED= 5.565 RANGE= 0.342 WIDTH(Y)= 2.560 RESP(Y)= 0.9078 HSQC= H21
GB2 / 1     3.221604 1*1*1      STAT=Y      PRED= 3.526 RANGE= 0.200 WIDTH(Y)= 2.435 RESP(Y)= 0.9171 HSQC= C23
GB3 / 1     3.372479 1*1*1      STAT=Y      PRED= 3.317 RANGE= 0.155 WIDTH(Y)= 2.075 RESP(Y)= 0.8548 HSQC= C26
GB4 / 1     3.069309 1*1*1      STAT=Y      PRED= 3.387 RANGE= 0.287 WIDTH(Y)= 1.708 RESP(Y)= 0.8374 HSQC= C27
GB5 / 1     3.070793 1*1*1      STAT=Y      PRED= 3.485 RANGE= 0.247 WIDTH(Y)= 1.821 RESP(Y)= 0.8314 HSQC= C25
GB6A / 1     3.417849 1*1*1      STAT=Y      PRED= 3.351 RANGE= 0.450 WIDTH(Y)= 2.276 RESP(Y)= 0.8318 HSQC= C29
GB6B / 1     3.671891 1*1*1      STAT=Y      PRED= 3.509 RANGE= 0.232 WIDTH(Y)= 2.813 RESP(Y)= 0.8536 HSQC= C29
OGB3 / 1     5.687464 1*1*1      STAT=Y      PRED= 4.296 RANGE= 1.420 WIDTH(Y)= 1.818 RESP(Y)= 0.8798
OGB4 / 1     5.024774 1*1*1      STAT=Y      PRED= 4.702 RANGE= 1.565 WIDTH(Y)= 1.748 RESP(Y)= 0.8679
OGB6 / 1     4.620924 1*1*1      STAT=Y      PRED= 5.633 RANGE= 1.215 WIDTH(Y)= 1.883 RESP(Y)= 0.8978
GC1 / 1     4.351810 1*1*1      STAT=Y      PRED= 5.565 RANGE= 0.342 WIDTH(Y)= 2.155 RESP(Y)= 0.9078 HSQC= H21
GC2 / 1     3.014400 1*1*1      STAT=Y      PRED= 3.526 RANGE= 0.200 WIDTH(Y)= 2.507 RESP(Y)= 0.9171 HSQC= C23
GC3 / 1     3.162714 1*1*1      STAT=Y      PRED= 3.317 RANGE= 0.155 WIDTH(Y)= 1.137 RESP(Y)= 0.8548 HSQC= C26
GC4 / 1     3.162017 1*1*1      STAT=Y      PRED= 3.387 RANGE= 0.287 WIDTH(Y)= 3.848 RESP(Y)= 0.8374 HSQC= C27
GC5 / 1     3.043839 1*1*1      STAT=Y      PRED= 3.485 RANGE= 0.247 WIDTH(Y)= 2.130 RESP(Y)= 0.8314 HSQC= C25
GC6A / 1     3.491978 1*1*1      STAT=Y      PRED= 3.351 RANGE= 0.450 WIDTH(Y)= 2.516 RESP(Y)= 0.8318 HSQC= C29
GC6B / 1     3.570773 1*1*1      STAT=Y      PRED= 3.509 RANGE= 0.232 WIDTH(Y)= 2.280 RESP(Y)= 0.8536 HSQC= C29
OGC2 / 1     5.325737 1*1*1      STAT=Y      PRED= 5.633 RANGE= 1.215 WIDTH(Y)= 1.680 RESP(Y)= 0.8978
OGC3 / 1     4.972581 1*1*1      STAT=Y      PRED= 4.296 RANGE= 1.420 WIDTH(Y)= 1.599 RESP(Y)= 0.8798
OGC4 / 1     4.854051 1*1*1      STAT=Y      PRED= 4.702 RANGE= 1.565 WIDTH(Y)= 1.610 RESP(Y)= 0.8679
OGC6 / 1     4.204299 1*1*1      STAT=Y      PRED= 5.633 RANGE= 1.215 WIDTH(Y)= 1.697 RESP(Y)= 0.8978
DMSO_CH 2*SPIN= 1 SPECIES=1H      POPULATION(Y)= 0.70808
DMSO / 2     2.499910 1*1*1      STAT=Y      PRED= 2.500 RANGE= 0.050 WIDTH(Y)= 1.448 RESP(Y)= 1.0000
DMSO_D 2*SPIN= 2 SPECIES=2D      POPULATION(Y)= 0.70808
DMSOD1/ 2 -100.000001 1*1*1      STAT=Y      PRED= -99.999 RANGE= 0.050 WIDTH(Y)= 1.500 RESP(Y)= 1.0000
DMSOD2/ 2 -100.000001 1*1*1      STAT=Y      PRED= -99.999 RANGE= 0.050 WIDTH(Y)= 1.500 RESP(Y)= 1.0000
WATER_H 2*SPIN= 1 SPECIES=1H      POPULATION(Y)= 0.20394
WATER / 3     3.337022 2*1*1      STAT=Y      PRED= 3.338 RANGE= 0.050 WIDTH(Y)= 1.273 RESP(Y)= 1.0000
ETOH_H 2*SPIN= 1 SPECIES=1H      POPULATION(Y)= 0.04120
ETOH1 / 4     1.052240 1*1*3      STAT=Y      PRED= 1.060 RANGE= 0.050 WIDTH(Y)= 1.055 RESP(Y)= 1.0000
ETOH2 / 4     3.436666 1*1*2      STAT=Y      PRED= 3.440 RANGE= 0.050 WIDTH(Y)= 1.124 RESP(Y)= 1.0000
ETOH3 / 4     4.356153 1*1*1      STAT=Y      PRED= 4.630 RANGE= 0.050 WIDTH(Y)= 1.223 RESP(Y)= 1.0000

```

### COUPLING CONSTANTS (HZ):

```

J12_13 -12.4926 J H1A H1B STAT=Y PRED= -13.130 RANGE= 1.500
J17_12 13.5669 J H1A H2A STAT=Y PRED= 12.550 RANGE= 2.560
J12_18 4.8980 J H1A H2B STAT=Y PRED= 4.380 RANGE= 3.800
J14_12 -0.2246 J H1A H20B STAT=Y PRED= -0.790 RANGE= 0.400
J17_13 3.5672 J H1B H2A STAT=Y PRED= 3.880 RANGE= 3.800

```

|        |          |         |        |        |               |              |
|--------|----------|---------|--------|--------|---------------|--------------|
| J13_18 | 2.9789   | J H1B   | H2B    | STAT=Y | PRED= 2.510   | RANGE= 2.800 |
| J13_19 | 3.0597   | J H1B   | H3A    | STAT=Y | PRED= 2.850   | RANGE= 1.280 |
| J17_18 | -13.2543 | J H2A   | H2B    | STAT=Y | PRED= -13.190 | RANGE= 1.500 |
| J17_19 | 4.1862   | J H2A   | H3A    | STAT=Y | PRED= 3.860   | RANGE= 3.800 |
| J17_20 | 13.3366  | J H2A   | H3B    | STAT=Y | PRED= 12.570  | RANGE= 2.560 |
| J19_18 | 1.9110   | J H2B   | H3A    | STAT=Y | PRED= 2.530   | RANGE= 2.800 |
| J20_18 | 4.6637   | J H2B   | H3B    | STAT=Y | PRED= 4.310   | RANGE= 3.800 |
| J19_20 | -12.7457 | J H3A   | H3B    | STAT=Y | PRED= -13.110 | RANGE= 1.500 |
| J21_22 | 12.3404  | J H5A   | H6A    | STAT=Y | PRED= 12.550  | RANGE= 2.560 |
| J21_23 | 0.3329   | J H5A   | H6B    | STAT=Y | PRED= 1.710   | RANGE= 2.800 |
| J22_23 | -11.7131 | J H6A   | H6B    | STAT=Y | PRED= -13.190 | RANGE= 1.500 |
| J22_24 | 13.4465  | J H6A   | H7A    | STAT=Y | PRED= 12.990  | RANGE= 2.560 |
| J22_25 | 3.3735   | J H6A   | H7B    | STAT=Y | PRED= 3.320   | RANGE= 3.800 |
| J23_24 | 4.0671   | J H6B   | H7A    | STAT=Y | PRED= 3.410   | RANGE= 3.800 |
| J23_25 | 3.6995   | J H6B   | H7B    | STAT=Y | PRED= 3.190   | RANGE= 3.800 |
| J24_25 | -12.1329 | J H7A   | H7B    | STAT=Y | PRED= -13.130 | RANGE= 1.500 |
| J26_1  | 1.2681   | J H9A   | H11A   | STAT=Y | PRED= 0.490   | RANGE= 2.800 |
| J26_2  | 8.1166   | J H9A   | H11B   | STAT=Y | PRED= 9.030   | RANGE= 3.580 |
| J26_6  | 1.9535   | J H9A   | H14B   | STAT=Y | PRED= 2.290   | RANGE= 1.100 |
| J1_2   | -16.3851 | J H11A  | H11B   | STAT=Y | PRED= -13.010 | RANGE= 1.500 |
| J3_1   | 3.6498   | J H11A  | H12A   | STAT=Y | PRED= 1.040   | RANGE= 2.800 |
| J4_1   | 6.1079   | J H11A  | H12B   | STAT=Y | PRED= 6.480   | RANGE= 3.800 |
| J3_2   | 5.9042   | J H11B  | H12A   | STAT=Y | PRED= 6.890   | RANGE= 3.800 |
| J4_2   | 12.9223  | J H11B  | H12B   | STAT=Y | PRED= 11.180  | RANGE= 2.800 |
| J3_4   | -11.1993 | J H12A  | H12B   | STAT=Y | PRED= -12.880 | RANGE= 1.500 |
| J3_6   | 2.5663   | J H12A  | H14B   | STAT=Y | PRED= 2.670   | RANGE= 1.280 |
| J5_6   | -11.4538 | J H14A  | H14B   | STAT=Y | PRED= -12.450 | RANGE= 2.000 |
| J7_5   | 3.2644   | J H14A  | H15A   | STAT=Y | PRED= 1.650   | RANGE= 1.280 |
| J7_8   | -16.9188 | J H15A  | H15B   | STAT=Y | PRED= -14.390 | RANGE= 3.000 |
| J7_9   | -2.0662  | J H15A  | H17A   | STAT=Y | PRED= -2.030  | RANGE= 1.000 |
| J7_10  | -0.1080  | J H15A  | H17B   | STAT=Y | PRED= -1.900  | RANGE= 0.950 |
| J9_8   | -3.4501  | J H15B  | H17A   | STAT=Y | PRED= -2.420  | RANGE= 1.200 |
| J10_8  | -2.7208  | J H15B  | H17B   | STAT=Y | PRED= -2.140  | RANGE= 1.100 |
| J9_10  | 0.6170   | J H17A  | H17B   | STAT=Y | PRED= 2.980   | RANGE= 4.000 |
| J38_40 | 8.2096   | J GA1   | GA2    | STAT=Y | PRED= 7.190   | RANGE= 3.580 |
| J40_43 | 9.0146   | J GA2   | GA3    | STAT=Y | PRED= 8.920   | RANGE= 3.580 |
| J40_48 | 5.9447   | J GA2   | OGA2   | STAT=Y | PRED= 4.300   | RANGE= 1.000 |
| J43_46 | 8.8753   | J GA3   | GA4    | STAT=Y | PRED= 9.140   | RANGE= 3.580 |
| J43_51 | 5.3639   | J GA3   | OGA3   | STAT=Y | PRED= 4.300   | RANGE= 1.000 |
| J41_46 | 9.8245   | J GA4   | GA5    | STAT=Y | PRED= 10.550  | RANGE= 2.560 |
| J46_52 | 5.4682   | J GA4   | OGA4   | STAT=Y | PRED= 4.300   | RANGE= 1.000 |
| J41_49 | 4.9747   | J GA5   | GA6A   | STAT=Y | PRED= 2.700   | RANGE= 3.000 |
| J41_50 | 2.0809   | J GA5   | GA6B   | STAT=Y | PRED= 1.280   | RANGE= 3.000 |
| J49_50 | -11.8162 | J GA6A  | GA6B   | STAT=Y | PRED= -12.300 | RANGE= 0.800 |
| J49_51 | 5.9130   | J GA6A  | OGA6   | STAT=Y | PRED= 4.300   | RANGE= 3.000 |
| J50_51 | 5.3363   | J GA6B  | OGA6   | STAT=Y | PRED= 4.300   | RANGE= 3.000 |
| J48_50 | 7.6636   | J GB1   | GB2    | STAT=Y | PRED= 7.190   | RANGE= 3.580 |
| J50_53 | 9.2253   | J GB2   | GB3    | STAT=Y | PRED= 8.920   | RANGE= 3.580 |
| J53_56 | 8.4017   | J GB3   | GB4    | STAT=Y | PRED= 9.140   | RANGE= 3.580 |
| J53_61 | 3.6005   | J GB3   | OGB3   | STAT=Y | PRED= 4.300   | RANGE= 1.000 |
| J51_56 | 8.9549   | J GB4   | GB5    | STAT=Y | PRED= 10.550  | RANGE= 2.560 |
| J56_62 | 5.6759   | J GB4   | OGB4   | STAT=Y | PRED= 4.300   | RANGE= 1.000 |
| J51_59 | 6.1065   | J GB5   | GB6A   | STAT=Y | PRED= 2.700   | RANGE= 3.000 |
| J51_60 | 2.0457   | J GB5   | GB6B   | STAT=Y | PRED= 1.280   | RANGE= 3.000 |
| J59_60 | -11.5565 | J GB6A  | GB6B   | STAT=Y | PRED= -12.300 | RANGE= 0.800 |
| J59_61 | 5.9626   | J GB6A  | OGB6   | STAT=Y | PRED= 4.300   | RANGE= 3.000 |
| J60_61 | 5.7723   | J GB6B  | OGB6   | STAT=Y | PRED= 4.300   | RANGE= 3.000 |
| J58_60 | 7.7309   | J GC1   | GC2    | STAT=Y | PRED= 7.190   | RANGE= 3.580 |
| J60_63 | 9.2744   | J GC2   | GC3    | STAT=Y | PRED= 8.920   | RANGE= 3.580 |
| J60_68 | 3.2533   | J GC2   | OGC2   | STAT=Y | PRED= 4.300   | RANGE= 1.000 |
| J63_66 | 7.8765   | J GC3   | GC4    | STAT=Y | PRED= 9.140   | RANGE= 3.580 |
| J63_71 | 4.7796   | J GC3   | OGC3   | STAT=Y | PRED= 4.300   | RANGE= 1.000 |
| J61_66 | 8.7523   | J GC4   | GC5    | STAT=Y | PRED= 10.550  | RANGE= 2.560 |
| J66_72 | 5.3220   | J GC4   | OGC4   | STAT=Y | PRED= 4.300   | RANGE= 1.000 |
| J61_69 | 4.3097   | J GC5   | GC6A   | STAT=Y | PRED= 2.700   | RANGE= 3.000 |
| J61_70 | 2.4397   | J GC5   | GC6B   | STAT=Y | PRED= 1.280   | RANGE= 3.000 |
| J69_70 | -11.2927 | J GC6A  | GC6B   | STAT=Y | PRED= -12.300 | RANGE= 0.800 |
| J69_71 | 6.1015   | J GC6A  | OGC6   | STAT=Y | PRED= 4.300   | RANGE= 3.000 |
| J70_71 | 5.2400   | J GC6B  | OGC6   | STAT=Y | PRED= 4.300   | RANGE= 3.000 |
| JDMSO1 | 1.7939   | J DMSO  | DMSOD1 | STAT=Y | PRED= 1.700   | RANGE= 0.050 |
| JDMSO1 | 1.7939   | J DMSO  | DMSOD2 | STAT=Y | PRED= 1.700   | RANGE= 0.050 |
| JETOH1 | 7.0000   | J ETOH1 | ETOH2  | STAT=Y | PRED= 7.000   | RANGE= 0.050 |
| JETOH2 | 5.0561   | J ETOH2 | ETOH3  | STAT=Y | PRED= 5.000   | RANGE= 0.050 |

CONTROL PARAMETERS:

Solvent = none (def. 99% enriched)  
 1.000 = Concentration (vol%, def=1.0%)  
 0.00100000 = Minimum line-intensity  
 0.00100000 = Diagonalization criterium (not in use)  
 600.12701400 = FIELD(1H,MHz), used to transform shifts to ppm  
 22.47832099 = Left frequency (ppm)  
 -7.49157654 = Right frequency (ppm)  
 0.000 = Acquisition time (s, for QMTLS)  
 1.057 = Line-width (for modes D, P & T, 0=use defaults)  
 0.068609924 = Data-point resolution (Hz)  
 76.574 = GAUSSIAN (% , 0=use default from INF)  
 9.224 = Dispersion contribution (% , 0=use default from INF)

0.00000000 = Decoupling frequency (for DORES)

CONSTRAINTS (in equations X0 = 1.0)...use no empty lines

```
EQUAL DMSOD1 = DMSOD2
1.000 * 1.0 = -41.020 * 1.0 - 1.000 * 1.0
10.000 * 1.0 = -38.340 * 1.0 - 1.000 * 1.0
11.000 * 1.0 = -16.670 * 1.0 - 1.000 * 1.0
12.000 * 1.0 = -36.870 * 1.0 - 1.000 * 1.0
13.000 * 1.0 = -80.200 * 1.0 - 1.000 * 1.0
14.000 * 1.0 = -49.010 * 1.0 - 1.000 * 1.0
15.000 * 1.0 = -48.090 * 1.0 - 1.000 * 1.0
16.0 * 1.0 = -153.1 * 1.0 - 1.0 * 1.0
17.0 * 1.0 = -104.2 * 1.0 - 1.0 * 1.0
18.000 * 1.0 = -28.210 * 1.0 - 1.000 * 1.0
19.0 * 1.0 = -185.4 * 1.0 - 1.0 * 1.0
2.000 * 1.0 = -19.040 * 1.0 - 1.000 * 1.0
20.000 * 1.0 = -14.770 * 1.0 - 1.000 * 1.0
3.000 * 1.0 = -37.520 * 1.0 - 1.000 * 1.0
4.000 * 1.0 = -43.240 * 1.0 - 1.000 * 1.0
5.000 * 1.0 = -55.060 * 1.0 - 1.000 * 1.0
6.000 * 1.0 = -21.840 * 1.0 - 1.000 * 1.0
7.000 * 1.0 = -40.820 * 1.0 - 1.000 * 1.0
8.000 * 1.0 = -42.640 * 1.0 - 1.000 * 1.0
9.000 * 1.0 = -55.850 * 1.0 - 1.000 * 1.0
```

END of FILE

**S8.** The  $^1\text{H}$  fingerprint of stevioside (**4**) in  $\text{DMSO-}d_6$  (29 mM, 600 MHz, 298 K). The calculated and observed NMR spectra are shown in red and blue, respectively.

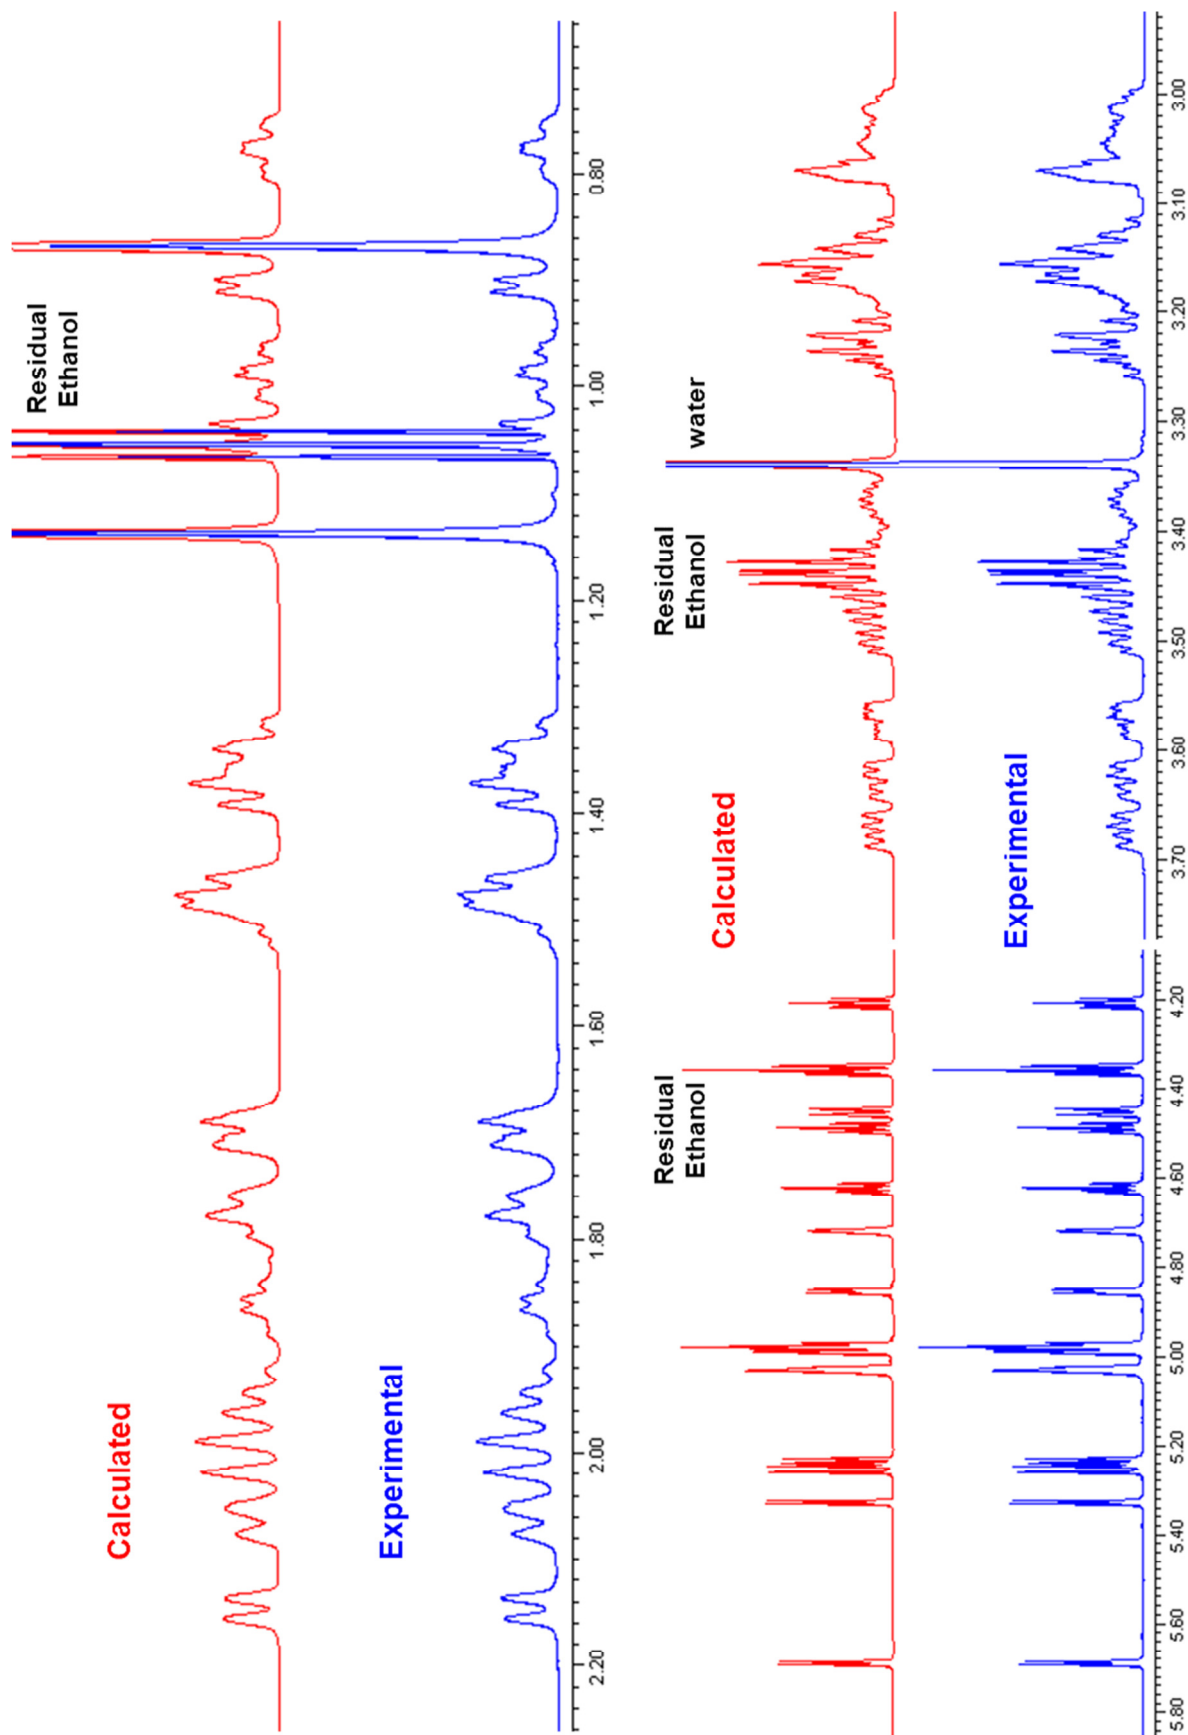

## S9. The HiFSA profile of dulcoside A (5) in DMSO-d<sub>6</sub> [in PERCH parameter (.pms) file format].

\* NEW: the lines beginning by \* are comment lines !  
 \* To keep all the chemical shifts fixed during iteration  
 \* replace "CHEMICAL SHIFTS(HZ):" by "..SHIFTS(HZ): fixed"  
 \* The couplings can be fixed in the same way

NMR-data: c:\HIFSA\Stevia\DulcosideA  
 #Date 10.10.2014; Time 21:54:51 dulcosideA.pms

### CHEMICAL SHIFTS (PPM) :

```

PROTON      2*SPIN= 1 SPECIES=1H      POPULATION(Y)= 0.07269
H1A / 1      0.769600 1*1*1  STAT=Y  PRED= 0.779 RANGE= 0.050 WIDTH(Y)= 4.548 RESP(Y)= 0.9579 HSQC= C1
H1B / 1      1.773433 1*1*1  STAT=Y  PRED= 1.778 RANGE= 0.050 WIDTH(Y)= 5.183 RESP(Y)= 0.9901 HSQC= C1
H2A / 1      1.793942 1*1*1  STAT=Y  PRED= 1.764 RANGE= 0.050 WIDTH(Y)= 6.158 RESP(Y)= 0.9034 HSQC= C2
H2B / 1      1.352028 1*1*1  STAT=Y  PRED= 1.332 RANGE= 0.050 WIDTH(Y)= 3.214 RESP(Y)= 0.9269 HSQC= C2
H3A / 1      2.051316 1*1*1  STAT=Y  PRED= 2.000 RANGE= 0.050 WIDTH(Y)= 3.171 RESP(Y)= 0.9312 HSQC= C3
H3B / 1      0.984104 1*1*1  STAT=Y  PRED= 0.932 RANGE= 0.050 WIDTH(Y)= 3.712 RESP(Y)= 0.9292 HSQC= C3
H5A / 1      1.041781 1*1*1  STAT=Y  PRED= 1.015 RANGE= 0.050 WIDTH(Y)= 4.114 RESP(Y)= 0.9664 HSQC= C5
H6A / 1      1.978965 1*1*1  STAT=Y  PRED= 1.700 RANGE= 0.050 WIDTH(Y)= 5.006 RESP(Y)= 0.9192 HSQC= C6
H6B / 1      1.693797 1*1*1  STAT=Y  PRED= 1.737 RANGE= 0.050 WIDTH(Y)= 4.405 RESP(Y)= 0.9360 HSQC= C6
H7A / 1      1.335765 1*1*1  STAT=Y  PRED= 1.360 RANGE= 0.050 WIDTH(Y)= 4.240 RESP(Y)= 0.9031 HSQC= C7
H7B / 1      1.473834 1*1*1  STAT=Y  PRED= 1.449 RANGE= 0.050 WIDTH(Y)= 4.047 RESP(Y)= 0.9915 HSQC= C7
H9A / 1      0.903361 1*1*1  STAT=Y  PRED= 0.921 RANGE= 0.050 WIDTH(Y)= 4.440 RESP(Y)= 0.9761 HSQC= C9
H11A / 1     1.683915 1*1*1  STAT=Y  PRED= 1.651 RANGE= 0.050 WIDTH(Y)= 5.310 RESP(Y)= 0.9509 HSQC= C11
H11B / 1     1.496768 1*1*1  STAT=Y  PRED= 1.429 RANGE= 0.050 WIDTH(Y)= 4.491 RESP(Y)= 0.9007 HSQC= C11
H12A / 1     1.393374 1*1*1  STAT=Y  PRED= 1.348 RANGE= 0.025 WIDTH(Y)= 6.522 RESP(Y)= 1.0000 HSQC= C12
H12B / 1     1.818426 1*1*1  STAT=Y  PRED= 1.599 RANGE= 0.050 WIDTH(Y)= 5.502 RESP(Y)= 0.9451 HSQC= C12
H14A / 1     2.026431 1*1*1  STAT=Y  PRED= 1.869 RANGE= 0.455 WIDTH(Y)= 4.401 RESP(Y)= 0.9685 HSQC= C14
H14B / 1     1.566712 1*1*1  STAT=Y  PRED= 1.192 RANGE= 0.050 WIDTH(Y)= 4.588 RESP(Y)= 0.9764 HSQC= C14
H15A / 1     1.975000 1*1*1  STAT=Y  PRED= 2.023 RANGE= 0.050 WIDTH(Y)= 4.126 RESP(Y)= 0.9421 HSQC= C15
H15B / 1     2.053821 1*1*1  STAT=Y  PRED= 2.052 RANGE= 0.050 WIDTH(Y)= 6.482 RESP(Y)= 0.9264 HSQC= C15
H17A / 1     4.991549 1*1*1  STAT=Y  PRED= 4.878 RANGE= 0.025 WIDTH(Y)= 3.536 RESP(Y)= 0.9638 HSQC= C17
H17B / 1     4.741988 1*1*1  STAT=Y  PRED= 4.687 RANGE= 0.025 WIDTH(Y)= 3.817 RESP(Y)= 0.9720 HSQC= C17
H18B / 1     1.136032 1*1*3  STAT=Y  PRED= 1.101 RANGE= 0.050 WIDTH(Y)= 3.267 RESP(Y)= 0.9314 HSQC= C18
H20B / 1     0.864247 1*1*3  STAT=Y  PRED= 0.866 RANGE= 0.050 WIDTH(Y)= 4.237 RESP(Y)= 0.9416 HSQC= C20
GA1 / 1     5.230042 1*1*1  STAT=Y  PRED= 5.565 RANGE= 0.342 WIDTH(Y)= 1.861 RESP(Y)= 0.9078 HSQC= H21
GA2 / 1     3.139602 1*1*1  STAT=Y  PRED= 3.526 RANGE= 0.200 WIDTH(Y)= 2.147 RESP(Y)= 0.9171 HSQC= C23
GA3 / 1     3.250012 1*1*1  STAT=Y  PRED= 3.317 RANGE= 0.155 WIDTH(Y)= 2.119 RESP(Y)= 0.8548 HSQC= C26
GA4 / 1     3.137602 1*1*1  STAT=Y  PRED= 3.387 RANGE= 0.287 WIDTH(Y)= 2.093 RESP(Y)= 0.8374 HSQC= C27
GA5 / 1     3.182454 1*1*1  STAT=Y  PRED= 3.485 RANGE= 0.247 WIDTH(Y)= 1.935 RESP(Y)= 0.8314 HSQC= C25
GA6A / 1     3.462338 1*1*1  STAT=Y  PRED= 3.351 RANGE= 0.450 WIDTH(Y)= 2.631 RESP(Y)= 0.8318 HSQC= C29
GA6B / 1     3.627737 1*1*1  STAT=Y  PRED= 3.509 RANGE= 0.232 WIDTH(Y)= 2.333 RESP(Y)= 0.8536 HSQC= C29
OGA2 / 1     5.325844 1*1*1  STAT=Y  PRED= 5.633 RANGE= 1.215 WIDTH(Y)= 2.195 RESP(Y)= 0.8978
OGA3 / 1     5.014704 1*1*1  STAT=Y  PRED= 4.296 RANGE= 1.420 WIDTH(Y)= 1.943 RESP(Y)= 0.8798
OGA4 / 1     4.991860 1*1*1  STAT=Y  PRED= 4.702 RANGE= 1.565 WIDTH(Y)= 1.799 RESP(Y)= 0.8679
OGA6 / 1     4.488581 1*1*1  STAT=Y  PRED= 5.633 RANGE= 1.215 WIDTH(Y)= 1.753 RESP(Y)= 0.8978
GB1 / 1     4.370956 1*1*1  STAT=Y  PRED= 5.565 RANGE= 0.342 WIDTH(Y)= 2.793 RESP(Y)= 0.9078 HSQC= H21
GB2 / 1     3.239020 1*1*1  STAT=Y  PRED= 3.526 RANGE= 0.200 WIDTH(Y)= 2.357 RESP(Y)= 0.9171 HSQC= C23
GB3 / 1     3.318284 1*1*1  STAT=Y  PRED= 3.317 RANGE= 0.155 WIDTH(Y)= 2.451 RESP(Y)= 0.8548 HSQC= C26
GB4 / 1     3.023018 1*1*1  STAT=Y  PRED= 3.387 RANGE= 0.287 WIDTH(Y)= 2.069 RESP(Y)= 0.8374 HSQC= C27
GB5 / 1     3.046462 1*1*1  STAT=Y  PRED= 3.485 RANGE= 0.247 WIDTH(Y)= 2.133 RESP(Y)= 0.8314 HSQC= C25
GB6A / 1     3.380396 1*1*1  STAT=Y  PRED= 3.351 RANGE= 0.450 WIDTH(Y)= 2.797 RESP(Y)= 0.8318 HSQC= C29
GB6B / 1     3.657217 1*1*1  STAT=Y  PRED= 3.509 RANGE= 0.232 WIDTH(Y)= 2.614 RESP(Y)= 0.8536 HSQC= C29
OGB3 / 1     5.112100 1*1*1  STAT=Y  PRED= 4.296 RANGE= 1.420 WIDTH(Y)= 1.908 RESP(Y)= 0.8798
OGB4 / 1     4.899442 1*1*1  STAT=Y  PRED= 4.702 RANGE= 1.565 WIDTH(Y)= 1.964 RESP(Y)= 0.8679
OGB6 / 1     4.606431 1*1*1  STAT=Y  PRED= 5.633 RANGE= 1.215 WIDTH(Y)= 2.018 RESP(Y)= 0.8978
RH1 / 1     5.190868 1*1*1  STAT=Y  PRED= 4.453 RANGE= 0.300 WIDTH(Y)= 2.236 RESP(Y)= 0.9527 HSQC= C33
RH2 / 1     3.653831 1*1*1  STAT=Y  PRED= 3.609 RANGE= 0.242 WIDTH(Y)= 2.023 RESP(Y)= 0.9502 HSQC= C38
RH3 / 1     3.437737 1*1*1  STAT=Y  PRED= 3.082 RANGE= 0.582 WIDTH(Y)= 2.240 RESP(Y)= 0.8779 HSQC= C39
RH4 / 1     3.193912 1*1*1  STAT=Y  PRED= 2.968 RANGE= 0.287 WIDTH(Y)= 2.323 RESP(Y)= 0.9349 HSQC= C37
RH5 / 1     3.917162 1*1*1  STAT=Y  PRED= 2.961 RANGE= 0.627 WIDTH(Y)= 2.547 RESP(Y)= 0.9335 HSQC= C36
RH6 / 1     1.075796 1*1*3  STAT=Y  PRED= 0.586 RANGE= 0.262 WIDTH(Y)= 2.533 RESP(Y)= 0.8538 HSQC= C40
ORH2 / 1     4.582846 1*1*1  STAT=Y  PRED= 4.719 RANGE= 1.395 WIDTH(Y)= 1.574 RESP(Y)= 0.7880
ORH3 / 1     4.561345 1*1*1  STAT=Y  PRED= 4.127 RANGE= 1.613 WIDTH(Y)= 1.901 RESP(Y)= 0.8379
ORH4 / 1     4.799351 1*1*1  STAT=Y  PRED= 4.732 RANGE= 1.673 WIDTH(Y)= 1.856 RESP(Y)= 0.8554
DMSO_CH 2*SPIN= 1 SPECIES=1H      POPULATION(Y)= 0.63632
DMSO / 2     2.500036 1*1*1  STAT=Y  PRED= 2.500 RANGE= 0.050 WIDTH(Y)= 1.465 RESP(Y)= 1.0000
DMSO_D 2*SPIN= 2 SPECIES=2D      POPULATION(Y)= 0.63632
DMSOD1/ 2    -100.000001 1*1*1  STAT=Y  PRED= -99.999 RANGE= 0.050 WIDTH(Y)= 1.500 RESP(Y)= 1.0000
DMSOD2/ 2    -100.000001 1*1*1  STAT=Y  PRED= -99.999 RANGE= 0.050 WIDTH(Y)= 1.500 RESP(Y)= 1.0000
WATER_H 2*SPIN= 1 SPECIES=1H      POPULATION(Y)= 0.29099
WATER / 3     3.343032 2*1*1  STAT=Y  PRED= 3.338 RANGE= 0.050 WIDTH(Y)= 1.246 RESP(Y)= 1.0000
  
```

### COUPLING CONSTANTS (HZ) :

```

J12_13 -12.3508 J H1A H1B STAT=Y PRED= -13.130 RANGE= 1.500
J17_12 13.7243 J H1A H2A STAT=Y PRED= 12.550 RANGE= 2.560
J12_18 4.8051 J H1A H2B STAT=Y PRED= 4.380 RANGE= 3.800
J14_12 -0.0088 J H1A H20B STAT=Y PRED= -0.790 RANGE= 0.400
J17_13 4.4009 J H1B H2A STAT=Y PRED= 3.880 RANGE= 3.800
J13_18 2.2388 J H1B H2B STAT=Y PRED= 2.510 RANGE= 2.800
J13_19 1.5951 J H1B H3A STAT=Y PRED= 2.850 RANGE= 1.280
J17_18 -12.6499 J H2A H2B STAT=Y PRED= -13.190 RANGE= 1.500
J17_19 3.4159 J H2A H3A STAT=Y PRED= 3.860 RANGE= 3.800
J17_20 12.9429 J H2A H3B STAT=Y PRED= 12.570 RANGE= 2.560
J19_18 3.4307 J H2B H3A STAT=Y PRED= 2.530 RANGE= 2.800
  
```



|        |          |        |        |        |               |              |
|--------|----------|--------|--------|--------|---------------|--------------|
| J20_18 | 4.5157   | J H2B  | H3B    | STAT=Y | PRED= 4.310   | RANGE= 3.800 |
| J19_20 | -13.0462 | J H3A  | H3B    | STAT=Y | PRED= -13.110 | RANGE= 1.500 |
| J21_22 | 12.2827  | J H5A  | H6A    | STAT=Y | PRED= 12.550  | RANGE= 2.560 |
| J21_23 | 2.4901   | J H5A  | H6B    | STAT=Y | PRED= 1.710   | RANGE= 2.800 |
| J22_23 | -13.4373 | J H6A  | H6B    | STAT=Y | PRED= -13.190 | RANGE= 1.500 |
| J22_24 | 13.6812  | J H6A  | H7A    | STAT=Y | PRED= 12.990  | RANGE= 2.560 |
| J22_25 | 3.3636   | J H6A  | H7B    | STAT=Y | PRED= 3.320   | RANGE= 3.800 |
| J23_24 | 4.1555   | J H6B  | H7A    | STAT=Y | PRED= 3.410   | RANGE= 3.800 |
| J23_25 | 3.8013   | J H6B  | H7B    | STAT=Y | PRED= 3.190   | RANGE= 3.800 |
| J24_25 | -12.3785 | J H7A  | H7B    | STAT=Y | PRED= -13.130 | RANGE= 1.500 |
| J26_1  | 1.4395   | J H9A  | H11A   | STAT=Y | PRED= 0.490   | RANGE= 2.800 |
| J26_2  | 8.1488   | J H9A  | H11B   | STAT=Y | PRED= 9.030   | RANGE= 3.580 |
| J26_6  | 0.1724   | J H9A  | H14B   | STAT=Y | PRED= 2.290   | RANGE= 1.100 |
| J1_2   | -14.5755 | J H11A | H11B   | STAT=Y | PRED= -13.010 | RANGE= 1.500 |
| J3_1   | 1.4291   | J H11A | H12A   | STAT=Y | PRED= 1.040   | RANGE= 2.800 |
| J4_1   | 6.3966   | J H11A | H12B   | STAT=Y | PRED= 6.480   | RANGE= 3.800 |
| J3_2   | 6.9188   | J H11B | H12A   | STAT=Y | PRED= 6.890   | RANGE= 3.800 |
| J4_2   | 13.0395  | J H11B | H12B   | STAT=Y | PRED= 11.180  | RANGE= 2.800 |
| J3_4   | -11.8562 | J H12A | H12B   | STAT=Y | PRED= -12.880 | RANGE= 1.500 |
| J3_6   | 3.0246   | J H12A | H14B   | STAT=Y | PRED= 2.670   | RANGE= 1.280 |
| J5_6   | -11.2407 | J H14A | H14B   | STAT=Y | PRED= -12.450 | RANGE= 2.000 |
| J7_5   | 2.7762   | J H14A | H15A   | STAT=Y | PRED= 1.650   | RANGE= 1.280 |
| J7_8   | -16.9861 | J H15A | H15B   | STAT=Y | PRED= -14.390 | RANGE= 3.000 |
| J7_9   | -2.6861  | J H15A | H17A   | STAT=Y | PRED= -2.030  | RANGE= 1.000 |
| J7_10  | -2.2098  | J H15A | H17B   | STAT=Y | PRED= -1.900  | RANGE= 0.950 |
| J9_8   | -1.0451  | J H15B | H17A   | STAT=Y | PRED= -2.420  | RANGE= 1.200 |
| J10_8  | -0.8102  | J H15B | H17B   | STAT=Y | PRED= -2.140  | RANGE= 1.100 |
| J9_10  | 1.7270   | J H17A | H17B   | STAT=Y | PRED= 2.980   | RANGE= 4.000 |
| J38_40 | 8.2370   | J GA1  | GA2    | STAT=Y | PRED= 7.190   | RANGE= 3.580 |
| J40_43 | 9.2307   | J GA2  | GA3    | STAT=Y | PRED= 8.920   | RANGE= 3.580 |
| J40_48 | 6.2437   | J GA2  | OGA2   | STAT=Y | PRED= 4.300   | RANGE= 1.000 |
| J43_46 | 8.7619   | J GA3  | GA4    | STAT=Y | PRED= 9.140   | RANGE= 3.580 |
| J43_51 | 5.4894   | J GA3  | OGA3   | STAT=Y | PRED= 4.300   | RANGE= 1.000 |
| J41_46 | 9.6718   | J GA4  | GA5    | STAT=Y | PRED= 10.550  | RANGE= 2.560 |
| J46_52 | 5.5051   | J GA4  | OGA4   | STAT=Y | PRED= 4.300   | RANGE= 1.000 |
| J41_49 | 5.1400   | J GA5  | GA6A   | STAT=Y | PRED= 2.700   | RANGE= 3.000 |
| J41_50 | 2.2096   | J GA5  | GA6B   | STAT=Y | PRED= 1.280   | RANGE= 3.000 |
| J49_50 | -11.8380 | J GA6A | GA6B   | STAT=Y | PRED= -12.300 | RANGE= 0.800 |
| J49_51 | 5.8914   | J GA6A | OGA6   | STAT=Y | PRED= 4.300   | RANGE= 3.000 |
| J50_51 | 5.3438   | J GA6B | OGA6   | STAT=Y | PRED= 4.300   | RANGE= 3.000 |
| J48_50 | 7.8628   | J GB1  | GB2    | STAT=Y | PRED= 7.190   | RANGE= 3.580 |
| J50_53 | 8.8934   | J GB2  | GB3    | STAT=Y | PRED= 8.920   | RANGE= 3.580 |
| J53_56 | 8.7182   | J GB3  | GB4    | STAT=Y | PRED= 9.140   | RANGE= 3.580 |
| J53_61 | 5.8420   | J GB3  | OGB3   | STAT=Y | PRED= 4.300   | RANGE= 1.000 |
| J51_56 | 9.8313   | J GB4  | GB5    | STAT=Y | PRED= 10.550  | RANGE= 2.560 |
| J56_62 | 5.6038   | J GB4  | OGB4   | STAT=Y | PRED= 4.300   | RANGE= 1.000 |
| J51_59 | 6.2301   | J GB5  | GB6A   | STAT=Y | PRED= 2.700   | RANGE= 3.000 |
| J51_60 | 2.5373   | J GB5  | GB6B   | STAT=Y | PRED= 1.280   | RANGE= 3.000 |
| J59_60 | -11.6468 | J GB6A | GB6B   | STAT=Y | PRED= -12.300 | RANGE= 0.800 |
| J59_61 | 5.8916   | J GB6A | OGB6   | STAT=Y | PRED= 4.300   | RANGE= 3.000 |
| J60_61 | 5.7685   | J GB6B | OGB6   | STAT=Y | PRED= 4.300   | RANGE= 3.000 |
| J56_68 | 1.6172   | J RH1  | RH2    | STAT=Y | PRED= 2.330   | RANGE= 2.800 |
| J68_69 | 3.3168   | J RH2  | RH3    | STAT=Y | PRED= 3.420   | RANGE= 3.800 |
| J68_71 | 4.3703   | J RH2  | ORH2   | STAT=Y | PRED= 4.440   | RANGE= 1.500 |
| J66_69 | 9.3244   | J RH3  | RH4    | STAT=Y | PRED= 9.590   | RANGE= 3.580 |
| J69_72 | 6.0126   | J RH3  | ORH3   | STAT=Y | PRED= 4.300   | RANGE= 1.000 |
| J57_66 | 9.4213   | J RH4  | RH5    | STAT=Y | PRED= 9.940   | RANGE= 3.580 |
| J66_73 | 4.3603   | J RH4  | ORH4   | STAT=Y | PRED= 4.300   | RANGE= 1.000 |
| J57_59 | 6.1248   | J RH5  | RH6    | STAT=Y | PRED= 6.250   | RANGE= 0.600 |
| JDMSO1 | 1.7939   | J DMSO | DMSOD1 | STAT=Y | PRED= 1.700   | RANGE= 0.050 |
| JDMSO1 | 1.7939   | J DMSO | DMSOD2 | STAT=Y | PRED= 1.700   | RANGE= 0.050 |

CONTROL PARAMETERS:

Solvent = none (def. 99% enriched)  
 1.000 = Concentration (vol%, def=1.0%)  
 0.00100000 = Minimum line-intensity  
 0.00100000 = Diagonalization criterium (not in use)  
 600.12701400 = FIELD(1H,MHz), used to transform shifts to ppm  
 22.47832099 = Left frequency (ppm)  
 -7.49157654 = Right frequency (ppm)  
 10.000 = Acquisition time (s, for QMtls)  
 0.000 = Line-width (for modes D, P & T, 0=use defaults)  
 0.068609924 = Data-point resolution (Hz)  
 60.575 = GAUSSIAN (% , 0=use default from INF)  
 1.746 = Dispersion contribution (% , 0=use default from INF)  
 0.00000000 = Decoupling frequency (for DORES)

CONSTRAINTS (in equations X0 = 1.0)...use no empty lines

EQUAL DMSOD1 = DMSOD2  
 1.000 \* 1.0 = -41.020 \* 1.0 - 1.000 \* 1.0  
 10.000 \* 1.0 = -38.340 \* 1.0 - 1.000 \* 1.0  
 11.000 \* 1.0 = -16.670 \* 1.0 - 1.000 \* 1.0  
 12.000 \* 1.0 = -36.870 \* 1.0 - 1.000 \* 1.0  
 13.000 \* 1.0 = -80.200 \* 1.0 - 1.000 \* 1.0  
 14.000 \* 1.0 = -49.010 \* 1.0 - 1.000 \* 1.0  
 15.000 \* 1.0 = -48.090 \* 1.0 - 1.000 \* 1.0  
 16.0 \* 1.0 = -153.1 \* 1.0 - 1.0 \* 1.0

17.0 \* 1.0 = -104.2 \* 1.0 - 1.0 \* 1.0  
18.000 \* 1.0 = -28.210 \* 1.0 - 1.000 \* 1.0  
19.0 \* 1.0 = -185.4 \* 1.0 - 1.0 \* 1.0  
2.000 \* 1.0 = -19.040 \* 1.0 - 1.000 \* 1.0  
20.000 \* 1.0 = -14.770 \* 1.0 - 1.000 \* 1.0  
3.000 \* 1.0 = -37.520 \* 1.0 - 1.000 \* 1.0  
4.000 \* 1.0 = -43.240 \* 1.0 - 1.000 \* 1.0  
5.000 \* 1.0 = -55.060 \* 1.0 - 1.000 \* 1.0  
6.000 \* 1.0 = -21.840 \* 1.0 - 1.000 \* 1.0  
7.000 \* 1.0 = -40.820 \* 1.0 - 1.000 \* 1.0  
8.000 \* 1.0 = -42.640 \* 1.0 - 1.000 \* 1.0  
9.000 \* 1.0 = -55.850 \* 1.0 - 1.000 \* 1.0

END of FILE

**S10.** The  $^1\text{H}$  fingerprint of dulcoside A (**5**) in  $\text{DMSO-}d_6$  (33 mM, 600 MHz, 298 K). The calculated and observed NMR spectra are shown in red and blue, respectively.

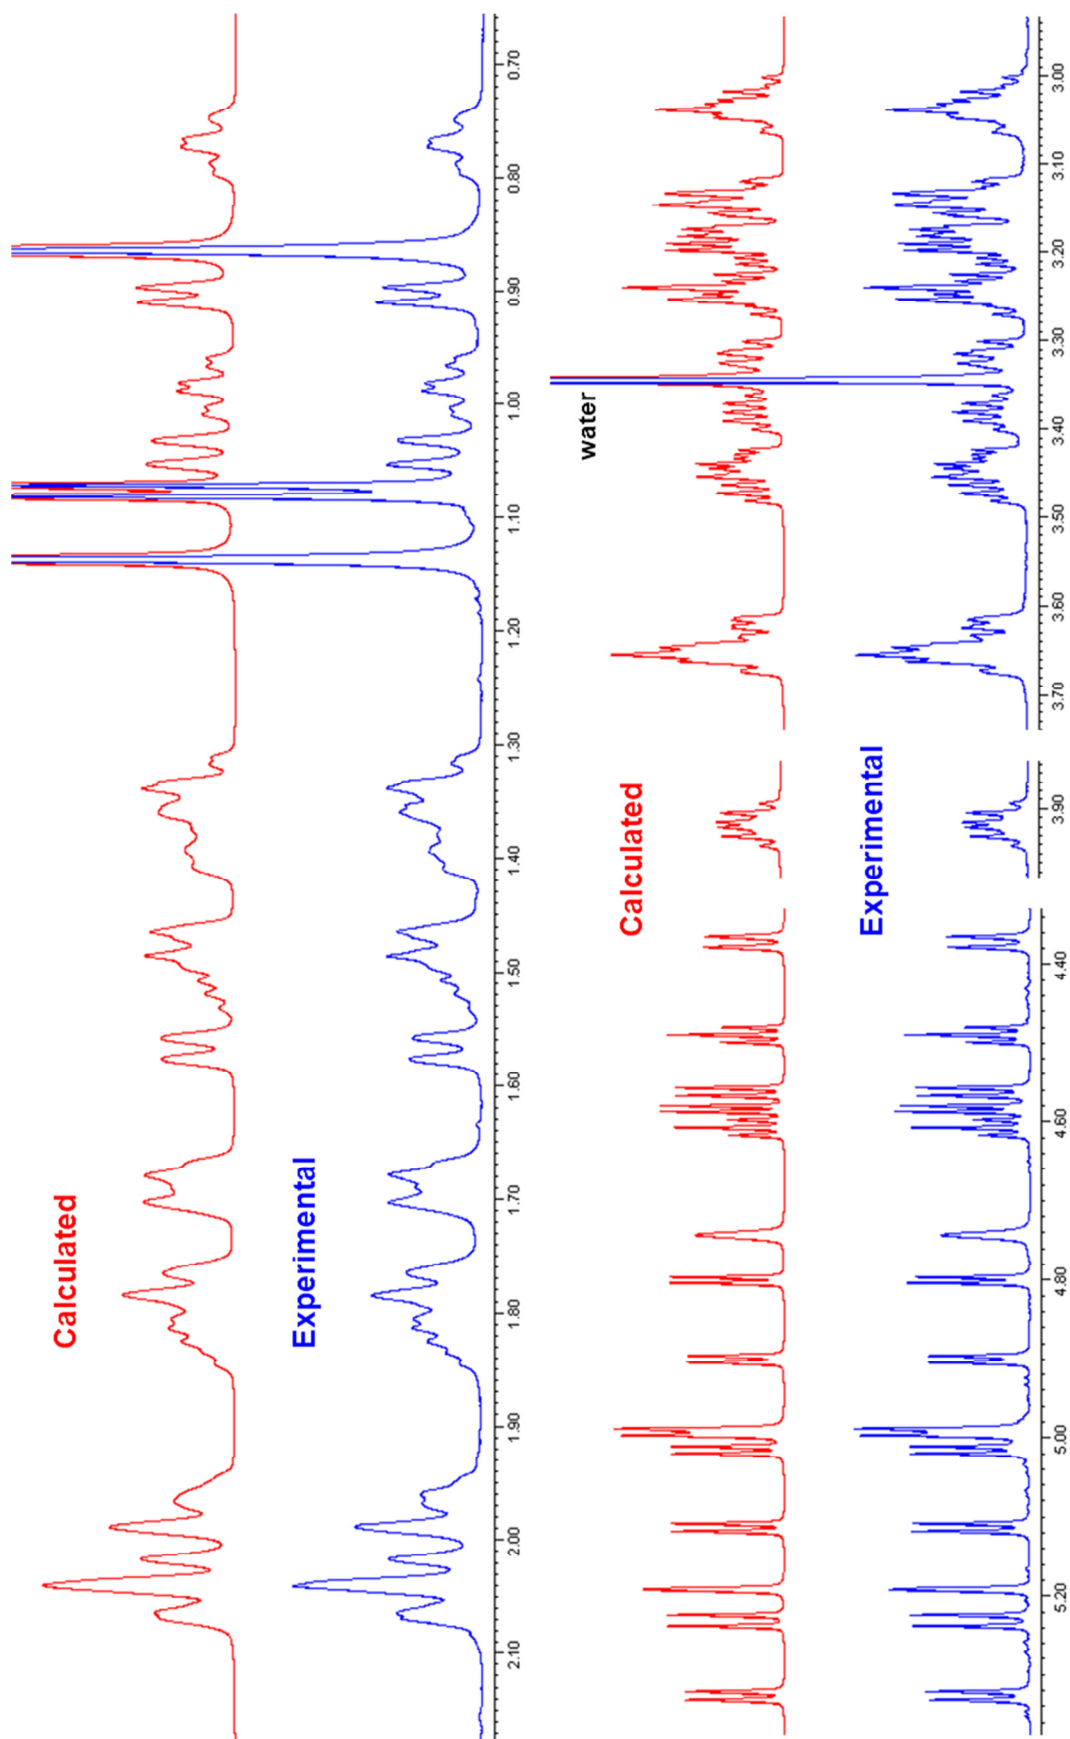

**S11. The HiFSA profile of rebaudioside A (6) in DMSO-*d*<sub>6</sub> [in PERCH parameter (.pms) file format].**

\* NEW: the lines beginning by \* are comment lines !  
 \* To keep all the chemical shifts fixed during iteration  
 \* replace "CHEMICAL SHIFTS(HZ):" by "...SHIFTS(HZ): fixed"  
 \* The couplings can be fixed in the same way

NMR-data: c:\HIFSA\Stevia\RebA  
 #\$\$ Date 11.10.2014; Time 21:41:12 rebA.pms

| CHEMICAL SHIFTS (PPM):       |         |          |             |                        |        |               |              |                 |                 |           |
|------------------------------|---------|----------|-------------|------------------------|--------|---------------|--------------|-----------------|-----------------|-----------|
| PROTON                       | 2*SPIN= | SPECIES= | IH          | POPULATION(Y)=         |        |               |              |                 |                 |           |
| H1A                          | /       | 1        | 0.776439    | 1*1*1                  | STAT=Y | PRED= 0.779   | RANGE= 0.050 | WIDTH(Y)= 4.929 | RESP(Y)= 0.9579 | HSQC= C1  |
| H1B                          | /       | 1        | 1.776161    | 1*1*1                  | STAT=Y | PRED= 1.778   | RANGE= 0.050 | WIDTH(Y)= 5.006 | RESP(Y)= 0.9901 | HSQC= C1  |
| H2A                          | /       | 1        | 1.796222    | 1*1*1                  | STAT=Y | PRED= 1.764   | RANGE= 0.050 | WIDTH(Y)= 4.946 | RESP(Y)= 0.9034 | HSQC= C2  |
| H2B                          | /       | 1        | 1.355462    | 1*1*1                  | STAT=Y | PRED= 1.332   | RANGE= 0.050 | WIDTH(Y)= 3.612 | RESP(Y)= 0.9269 | HSQC= C2  |
| H3A                          | /       | 1        | 2.057578    | 1*1*1                  | STAT=Y | PRED= 2.000   | RANGE= 0.050 | WIDTH(Y)= 3.106 | RESP(Y)= 0.9312 | HSQC= C3  |
| H3B                          | /       | 1        | 0.985909    | 1*1*1                  | STAT=Y | PRED= 0.932   | RANGE= 0.050 | WIDTH(Y)= 4.618 | RESP(Y)= 0.9292 | HSQC= C3  |
| H5A                          | /       | 1        | 1.047221    | 1*1*1                  | STAT=Y | PRED= 1.015   | RANGE= 0.050 | WIDTH(Y)= 5.355 | RESP(Y)= 0.9664 | HSQC= C5  |
| H6A                          | /       | 1        | 1.929700    | 1*1*1                  | STAT=Y | PRED= 1.700   | RANGE= 0.050 | WIDTH(Y)= 5.298 | RESP(Y)= 0.9192 | HSQC= C6  |
| H6B                          | /       | 1        | 1.708444    | 1*1*1                  | STAT=Y | PRED= 1.737   | RANGE= 0.050 | WIDTH(Y)= 4.795 | RESP(Y)= 0.9360 | HSQC= C6  |
| H7A                          | /       | 1        | 1.344957    | 1*1*1                  | STAT=Y | PRED= 1.360   | RANGE= 0.050 | WIDTH(Y)= 4.973 | RESP(Y)= 0.9031 | HSQC= C7  |
| H7B                          | /       | 1        | 1.476214    | 1*1*1                  | STAT=Y | PRED= 1.449   | RANGE= 0.050 | WIDTH(Y)= 4.878 | RESP(Y)= 0.9915 | HSQC= C7  |
| H9A                          | /       | 1        | 0.907643    | 1*1*1                  | STAT=Y | PRED= 0.921   | RANGE= 0.050 | WIDTH(Y)= 4.537 | RESP(Y)= 0.9761 | HSQC= C9  |
| H11A                         | /       | 1        | 1.688225    | 1*1*1                  | STAT=Y | PRED= 1.651   | RANGE= 0.050 | WIDTH(Y)= 5.695 | RESP(Y)= 0.9509 | HSQC= C11 |
| H11B                         | /       | 1        | 1.490198    | 1*1*1                  | STAT=Y | PRED= 1.429   | RANGE= 0.050 | WIDTH(Y)= 5.126 | RESP(Y)= 0.9007 | HSQC= C11 |
| H12A                         | /       | 1        | 1.451865    | 1*1*1                  | STAT=Y | PRED= 1.348   | RANGE= 0.025 | WIDTH(Y)= 5.880 | RESP(Y)= 1.0000 | HSQC= C12 |
| H12B                         | /       | 1        | 1.859251    | 1*1*1                  | STAT=Y | PRED= 1.599   | RANGE= 0.050 | WIDTH(Y)= 5.441 | RESP(Y)= 0.9451 | HSQC= C12 |
| H14A                         | /       | 1        | 2.093945    | 1*1*1                  | STAT=Y | PRED= 1.869   | RANGE= 0.455 | WIDTH(Y)= 4.836 | RESP(Y)= 0.9685 | HSQC= C14 |
| H14B                         | /       | 1        | 1.438310    | 1*1*1                  | STAT=Y | PRED= 1.192   | RANGE= 0.050 | WIDTH(Y)= 4.067 | RESP(Y)= 0.9764 | HSQC= C14 |
| H15A                         | /       | 1        | 1.982807    | 1*1*1                  | STAT=Y | PRED= 2.023   | RANGE= 0.050 | WIDTH(Y)= 5.387 | RESP(Y)= 0.9421 | HSQC= C15 |
| H15B                         | /       | 1        | 2.038472    | 1*1*1                  | STAT=Y | PRED= 2.052   | RANGE= 0.050 | WIDTH(Y)= 5.151 | RESP(Y)= 0.9264 | HSQC= C15 |
| H17A                         | /       | 1        | 5.047577    | 1*1*1                  | STAT=Y | PRED= 4.878   | RANGE= 0.025 | WIDTH(Y)= 4.325 | RESP(Y)= 0.9638 | HSQC= C17 |
| H17B                         | /       | 1        | 4.735090    | 1*1*1                  | STAT=Y | PRED= 4.687   | RANGE= 0.025 | WIDTH(Y)= 4.404 | RESP(Y)= 0.9720 | HSQC= C17 |
| H18B                         | /       | 1        | 1.137858    | 1*1*3                  | STAT=Y | PRED= 1.101   | RANGE= 0.050 | WIDTH(Y)= 3.515 | RESP(Y)= 0.9314 | HSQC= C18 |
| H20B                         | /       | 1        | 0.865215    | 1*1*3                  | STAT=Y | PRED= 0.866   | RANGE= 0.050 | WIDTH(Y)= 4.459 | RESP(Y)= 0.9416 | HSQC= C20 |
| GA1                          | /       | 1        | 5.268449    | 1*1*1                  | STAT=Y | PRED= 5.565   | RANGE= 0.342 | WIDTH(Y)= 1.728 | RESP(Y)= 0.9078 | HSQC= H21 |
| GA2                          | /       | 1        | 3.134209    | 1*1*1                  | STAT=Y | PRED= 3.526   | RANGE= 0.200 | WIDTH(Y)= 3.620 | RESP(Y)= 0.9171 | HSQC= C23 |
| GA3                          | /       | 1        | 3.239257    | 1*1*1                  | STAT=Y | PRED= 3.317   | RANGE= 0.155 | WIDTH(Y)= 1.918 | RESP(Y)= 0.8548 | HSQC= C26 |
| GA4                          | /       | 1        | 3.129266    | 1*1*1                  | STAT=Y | PRED= 3.387   | RANGE= 0.287 | WIDTH(Y)= 3.730 | RESP(Y)= 0.8374 | HSQC= C27 |
| GA5                          | /       | 1        | 3.186219    | 1*1*1                  | STAT=Y | PRED= 3.485   | RANGE= 0.247 | WIDTH(Y)= 2.247 | RESP(Y)= 0.8314 | HSQC= C25 |
| GA6A                         | /       | 1        | 3.396356    | 1*1*1                  | STAT=Y | PRED= 3.351   | RANGE= 0.450 | WIDTH(Y)= 2.376 | RESP(Y)= 0.8318 | HSQC= C29 |
| GA6B                         | /       | 1        | 3.693565    | 1*1*1                  | STAT=Y | PRED= 3.509   | RANGE= 0.232 | WIDTH(Y)= 2.391 | RESP(Y)= 0.8536 | HSQC= C29 |
| OGA2                         | /       | 1        | 5.232683    | 1*1*1                  | STAT=Y | PRED= 5.633   | RANGE= 1.215 | WIDTH(Y)= 2.029 | RESP(Y)= 0.8978 |           |
| OGA3                         | /       | 1        | 4.981146    | 1*1*1                  | STAT=Y | PRED= 4.296   | RANGE= 1.420 | WIDTH(Y)= 1.617 | RESP(Y)= 0.8798 |           |
| OGA4                         | /       | 1        | 4.975743    | 1*1*1                  | STAT=Y | PRED= 4.702   | RANGE= 1.565 | WIDTH(Y)= 1.564 | RESP(Y)= 0.8679 |           |
| OGA6                         | /       | 1        | 4.596433    | 1*1*1                  | STAT=Y | PRED= 5.633   | RANGE= 1.215 | WIDTH(Y)= 1.676 | RESP(Y)= 0.8978 |           |
| GB1                          | /       | 1        | 4.462464    | 1*1*1                  | STAT=Y | PRED= 5.565   | RANGE= 0.342 | WIDTH(Y)= 3.011 | RESP(Y)= 0.9078 | HSQC= H21 |
| GB2                          | /       | 1        | 3.485860    | 1*1*1                  | STAT=Y | PRED= 3.526   | RANGE= 0.200 | WIDTH(Y)= 2.523 | RESP(Y)= 0.9171 | HSQC= C23 |
| GB3                          | /       | 1        | 3.537517    | 1*1*1                  | STAT=Y | PRED= 3.317   | RANGE= 0.155 | WIDTH(Y)= 2.459 | RESP(Y)= 0.8548 | HSQC= C26 |
| GB4                          | /       | 1        | 3.140933    | 1*1*1                  | STAT=Y | PRED= 3.387   | RANGE= 0.287 | WIDTH(Y)= 1.706 | RESP(Y)= 0.8374 | HSQC= C27 |
| GB5                          | /       | 1        | 3.164798    | 1*1*1                  | STAT=Y | PRED= 3.485   | RANGE= 0.247 | WIDTH(Y)= 2.584 | RESP(Y)= 0.8314 | HSQC= C25 |
| GB6A                         | /       | 1        | 3.459111    | 1*1*1                  | STAT=Y | PRED= 3.351   | RANGE= 0.450 | WIDTH(Y)= 2.313 | RESP(Y)= 0.8318 | HSQC= C29 |
| GB6B                         | /       | 1        | 3.625055    | 1*1*1                  | STAT=Y | PRED= 3.509   | RANGE= 0.232 | WIDTH(Y)= 3.579 | RESP(Y)= 0.8536 | HSQC= C29 |
| OGB4                         | /       | 1        | 4.501016    | 1*1*1                  | STAT=Y | PRED= 4.702   | RANGE= 1.565 | WIDTH(Y)= 1.764 | RESP(Y)= 0.8679 |           |
| OGB6                         | /       | 1        | 4.492673    | 1*1*1                  | STAT=Y | PRED= 5.633   | RANGE= 1.215 | WIDTH(Y)= 1.584 | RESP(Y)= 0.8978 |           |
| GC1                          | /       | 1        | 4.628839    | 1*1*1                  | STAT=Y | PRED= 5.565   | RANGE= 0.342 | WIDTH(Y)= 2.551 | RESP(Y)= 0.9078 | HSQC= H21 |
| GC2                          | /       | 1        | 2.973995    | 1*1*1                  | STAT=Y | PRED= 3.526   | RANGE= 0.200 | WIDTH(Y)= 2.553 | RESP(Y)= 0.9171 | HSQC= C23 |
| GC3                          | /       | 1        | 3.138851    | 1*1*1                  | STAT=Y | PRED= 3.317   | RANGE= 0.155 | WIDTH(Y)= 1.841 | RESP(Y)= 0.8548 | HSQC= C26 |
| GC4                          | /       | 1        | 3.050044    | 1*1*1                  | STAT=Y | PRED= 3.387   | RANGE= 0.287 | WIDTH(Y)= 1.667 | RESP(Y)= 0.8374 | HSQC= C27 |
| GC5                          | /       | 1        | 3.049883    | 1*1*1                  | STAT=Y | PRED= 3.485   | RANGE= 0.247 | WIDTH(Y)= 1.589 | RESP(Y)= 0.8314 | HSQC= C25 |
| GC6A                         | /       | 1        | 3.425120    | 1*1*1                  | STAT=Y | PRED= 3.351   | RANGE= 0.450 | WIDTH(Y)= 3.751 | RESP(Y)= 0.8318 | HSQC= C29 |
| GC6B                         | /       | 1        | 3.606473    | 1*1*1                  | STAT=Y | PRED= 3.509   | RANGE= 0.232 | WIDTH(Y)= 2.524 | RESP(Y)= 0.8536 | HSQC= C29 |
| OGC2                         | /       | 1        | 5.141521    | 1*1*1                  | STAT=Y | PRED= 5.633   | RANGE= 1.215 | WIDTH(Y)= 2.034 | RESP(Y)= 0.8978 |           |
| OGC3                         | /       | 1        | 4.982919    | 1*1*1                  | STAT=Y | PRED= 4.296   | RANGE= 1.420 | WIDTH(Y)= 1.579 | RESP(Y)= 0.8798 |           |
| OGC4                         | /       | 1        | 4.898931    | 1*1*1                  | STAT=Y | PRED= 4.702   | RANGE= 1.565 | WIDTH(Y)= 1.733 | RESP(Y)= 0.8679 |           |
| OGC6                         | /       | 1        | 4.099578    | 1*1*1                  | STAT=Y | PRED= 5.633   | RANGE= 1.215 | WIDTH(Y)= 1.719 | RESP(Y)= 0.8978 |           |
| GD1                          | /       | 1        | 4.418061    | 1*1*1                  | STAT=Y | PRED= 5.565   | RANGE= 0.342 | WIDTH(Y)= 2.400 | RESP(Y)= 0.9078 | HSQC= H21 |
| GD2                          | /       | 1        | 3.034697    | 1*1*1                  | STAT=Y | PRED= 3.526   | RANGE= 0.200 | WIDTH(Y)= 2.061 | RESP(Y)= 0.9171 | HSQC= C23 |
| GD3                          | /       | 1        | 3.142994    | 1*1*1                  | STAT=Y | PRED= 3.317   | RANGE= 0.155 | WIDTH(Y)= 1.661 | RESP(Y)= 0.8548 | HSQC= C26 |
| GD4                          | /       | 1        | 3.059512    | 1*1*1                  | STAT=Y | PRED= 3.387   | RANGE= 0.287 | WIDTH(Y)= 1.874 | RESP(Y)= 0.8374 | HSQC= C27 |
| GD5                          | /       | 1        | 3.185242    | 1*1*1                  | STAT=Y | PRED= 3.485   | RANGE= 0.247 | WIDTH(Y)= 1.991 | RESP(Y)= 0.8314 | HSQC= C25 |
| GD6A                         | /       | 1        | 3.418615    | 1*1*1                  | STAT=Y | PRED= 3.351   | RANGE= 0.450 | WIDTH(Y)= 3.166 | RESP(Y)= 0.8318 | HSQC= C29 |
| GD6B                         | /       | 1        | 3.680778    | 1*1*1                  | STAT=Y | PRED= 3.509   | RANGE= 0.232 | WIDTH(Y)= 2.819 | RESP(Y)= 0.8536 | HSQC= C29 |
| OGD2                         | /       | 1        | 5.628618    | 1*1*1                  | STAT=Y | PRED= 5.633   | RANGE= 1.215 | WIDTH(Y)= 1.924 | RESP(Y)= 0.8978 |           |
| OGD3                         | /       | 1        | 5.105333    | 1*1*1                  | STAT=Y | PRED= 4.296   | RANGE= 1.420 | WIDTH(Y)= 1.697 | RESP(Y)= 0.8798 |           |
| OGD4                         | /       | 1        | 5.029260    | 1*1*1                  | STAT=Y | PRED= 4.702   | RANGE= 1.565 | WIDTH(Y)= 1.604 | RESP(Y)= 0.8679 |           |
| OGD6                         | /       | 1        | 4.681769    | 1*1*1                  | STAT=Y | PRED= 5.633   | RANGE= 1.215 | WIDTH(Y)= 1.936 | RESP(Y)= 0.8978 |           |
| DMSO_CH 2*SPIN= 1 SPECIES=1H |         |          |             | POPULATION(Y)= 0.78165 |        |               |              |                 |                 |           |
| DMSO                         | /       | 2        | 2.500037    | 1*1*1                  | STAT=Y | PRED= 2.500   | RANGE= 0.050 | WIDTH(Y)= 1.386 | RESP(Y)= 1.0000 |           |
| DMSO_D 2*SPIN= 2 SPECIES=2D  |         |          |             | POPULATION(Y)= 0.78165 |        |               |              |                 |                 |           |
| DMSOD1                       | /       | 2        | -100.000001 | 1*1*1                  | STAT=Y | PRED= -99.999 | RANGE= 0.050 | WIDTH(Y)= 1.500 | RESP(Y)= 1.0000 |           |
| DMSOD2                       | /       | 2        | -100.000001 | 1*1*1                  | STAT=Y | PRED= -99.999 | RANGE= 0.050 | WIDTH(Y)= 1.500 | RESP(Y)= 1.0000 |           |
| WATER_H 2*SPIN= 1 SPECIES=1H |         |          |             | POPULATION(Y)= 0.14734 |        |               |              |                 |                 |           |
| WATER                        | /       | 3        | 3.336916    | 2*1*1                  | STAT=Y | PRED= 3.338   | RANGE= 0.050 | WIDTH(Y)= 1.538 | RESP(Y)= 1.0000 |           |
| ETOH_H 2*SPIN= 1 SPECIES=1H  |         |          |             | POPULATION(Y)= 0.00672 |        |               |              |                 |                 |           |

|           |          |       |        |             |              |                 |                 |
|-----------|----------|-------|--------|-------------|--------------|-----------------|-----------------|
| ETOH1 / 4 | 1.051882 | 1*1*3 | STAT=Y | PRED= 1.060 | RANGE= 0.050 | WIDTH(Y)= 0.998 | RESP(Y)= 1.0000 |
| ETOH2 / 4 | 3.436263 | 1*1*2 | STAT=Y | PRED= 3.440 | RANGE= 0.050 | WIDTH(Y)= 0.997 | RESP(Y)= 1.0000 |
| ETOH3 / 4 | 4.355242 | 1*1*1 | STAT=Y | PRED= 4.630 | RANGE= 0.050 | WIDTH(Y)= 1.023 | RESP(Y)= 1.0000 |

COUPLING CONSTANTS (HZ) :

|        |          |        |      |        |               |              |
|--------|----------|--------|------|--------|---------------|--------------|
| J12_13 | -12.5140 | J H1A  | H1B  | STAT=Y | PRED= -13.130 | RANGE= 1.500 |
| J17_12 | 14.0074  | J H1A  | H2A  | STAT=Y | PRED= 12.550  | RANGE= 2.560 |
| J12_18 | 5.2986   | J H1A  | H2B  | STAT=Y | PRED= 4.380   | RANGE= 3.800 |
| J14_12 | -0.0689  | J H1A  | H20B | STAT=Y | PRED= -0.790  | RANGE= 0.400 |
| J17_13 | 4.1940   | J H1B  | H2A  | STAT=Y | PRED= 3.880   | RANGE= 3.800 |
| J13_18 | 3.4388   | J H1B  | H2B  | STAT=Y | PRED= 2.510   | RANGE= 2.800 |
| J13_19 | 3.1226   | J H1B  | H3A  | STAT=Y | PRED= 2.850   | RANGE= 1.280 |
| J17_18 | -12.9881 | J H2A  | H2B  | STAT=Y | PRED= -13.190 | RANGE= 1.500 |
| J17_19 | 4.1645   | J H2A  | H3A  | STAT=Y | PRED= 3.860   | RANGE= 3.800 |
| J17_20 | 14.0460  | J H2A  | H3B  | STAT=Y | PRED= 12.570  | RANGE= 2.560 |
| J19_18 | 1.9339   | J H2B  | H3A  | STAT=Y | PRED= 2.530   | RANGE= 2.800 |
| J20_18 | 4.8775   | J H2B  | H3B  | STAT=Y | PRED= 4.310   | RANGE= 3.800 |
| J19_20 | -12.3568 | J H3A  | H3B  | STAT=Y | PRED= -13.110 | RANGE= 1.500 |
| J21_22 | 12.2268  | J H5A  | H6A  | STAT=Y | PRED= 12.550  | RANGE= 2.560 |
| J21_23 | 1.9806   | J H5A  | H6B  | STAT=Y | PRED= 1.710   | RANGE= 2.800 |
| J22_23 | -13.1188 | J H6A  | H6B  | STAT=Y | PRED= -13.190 | RANGE= 1.500 |
| J22_24 | 14.2307  | J H6A  | H7A  | STAT=Y | PRED= 12.990  | RANGE= 2.560 |
| J22_25 | 3.4659   | J H6A  | H7B  | STAT=Y | PRED= 3.320   | RANGE= 3.800 |
| J23_24 | 4.0568   | J H6B  | H7A  | STAT=Y | PRED= 3.410   | RANGE= 3.800 |
| J23_25 | 3.4963   | J H6B  | H7B  | STAT=Y | PRED= 3.190   | RANGE= 3.800 |
| J24_25 | -11.9249 | J H7A  | H7B  | STAT=Y | PRED= -13.130 | RANGE= 1.500 |
| J26_1  | 1.1766   | J H9A  | H11A | STAT=Y | PRED= 0.490   | RANGE= 2.800 |
| J26_2  | 8.0742   | J H9A  | H11B | STAT=Y | PRED= 9.030   | RANGE= 3.580 |
| J26_6  | 1.7522   | J H9A  | H14B | STAT=Y | PRED= 2.290   | RANGE= 1.100 |
| J1_2   | -14.8153 | J H11A | H11B | STAT=Y | PRED= -13.010 | RANGE= 1.500 |
| J3_1   | 4.0450   | J H11A | H12A | STAT=Y | PRED= 1.040   | RANGE= 2.800 |
| J4_1   | 6.0550   | J H11A | H12B | STAT=Y | PRED= 6.480   | RANGE= 3.800 |
| J3_2   | 6.7453   | J H11B | H12A | STAT=Y | PRED= 6.890   | RANGE= 3.800 |
| J4_2   | 12.9566  | J H11B | H12B | STAT=Y | PRED= 11.180  | RANGE= 2.800 |
| J3_4   | -11.0057 | J H12A | H12B | STAT=Y | PRED= -12.880 | RANGE= 1.500 |
| J3_6   | 3.6938   | J H12A | H14B | STAT=Y | PRED= 2.670   | RANGE= 1.280 |
| J5_6   | -11.5467 | J H14A | H14B | STAT=Y | PRED= -12.450 | RANGE= 2.000 |
| J7_5   | 3.1100   | J H14A | H15A | STAT=Y | PRED= 1.650   | RANGE= 1.280 |
| J7_8   | -16.9583 | J H15A | H15B | STAT=Y | PRED= -14.390 | RANGE= 3.000 |
| J7_9   | -1.8989  | J H15A | H17A | STAT=Y | PRED= -2.030  | RANGE= 1.000 |
| J7_10  | -0.9307  | J H15A | H17B | STAT=Y | PRED= -1.900  | RANGE= 0.950 |
| J9_8   | -3.0845  | J H15B | H17A | STAT=Y | PRED= -2.420  | RANGE= 1.200 |
| J10_8  | -2.2089  | J H15B | H17B | STAT=Y | PRED= -2.140  | RANGE= 1.100 |
| J9_10  | 0.0776   | J H17A | H17B | STAT=Y | PRED= 2.980   | RANGE= 4.000 |
| J38_40 | 8.1814   | J GA1  | GA2  | STAT=Y | PRED= 7.190   | RANGE= 3.580 |
| J40_43 | 9.3156   | J GA2  | GA3  | STAT=Y | PRED= 8.920   | RANGE= 3.580 |
| J40_48 | 5.7851   | J GA2  | OGA2 | STAT=Y | PRED= 4.300   | RANGE= 1.000 |
| J43_46 | 8.5190   | J GA3  | GA4  | STAT=Y | PRED= 9.140   | RANGE= 3.580 |
| J43_51 | 5.3022   | J GA3  | OGA3 | STAT=Y | PRED= 4.300   | RANGE= 1.000 |
| J41_46 | 9.9534   | J GA4  | GA5  | STAT=Y | PRED= 10.550  | RANGE= 2.560 |
| J46_52 | 5.5141   | J GA4  | OGA4 | STAT=Y | PRED= 4.300   | RANGE= 1.000 |
| J41_49 | 6.9818   | J GA5  | GA6A | STAT=Y | PRED= 2.700   | RANGE= 3.000 |
| J41_50 | 2.3264   | J GA5  | GA6B | STAT=Y | PRED= 1.280   | RANGE= 3.000 |
| J49_50 | -11.7188 | J GA6A | GA6B | STAT=Y | PRED= -12.300 | RANGE= 0.800 |
| J49_51 | 5.4851   | J GA6A | OGA6 | STAT=Y | PRED= 4.300   | RANGE= 3.000 |
| J50_51 | 5.0936   | J GA6B | OGA6 | STAT=Y | PRED= 4.300   | RANGE= 3.000 |
| J48_50 | 7.7805   | J GB1  | GB2  | STAT=Y | PRED= 7.190   | RANGE= 3.580 |
| J50_53 | 9.1744   | J GB2  | GB3  | STAT=Y | PRED= 8.920   | RANGE= 3.580 |
| J53_56 | 8.4747   | J GB3  | GB4  | STAT=Y | PRED= 9.140   | RANGE= 3.580 |
| J51_56 | 8.5028   | J GB4  | GB5  | STAT=Y | PRED= 10.550  | RANGE= 2.560 |
| J56_62 | 2.3517   | J GB4  | OGB4 | STAT=Y | PRED= 4.300   | RANGE= 1.000 |
| J51_59 | 4.5411   | J GB5  | GB6A | STAT=Y | PRED= 2.700   | RANGE= 3.000 |
| J51_60 | 1.0131   | J GB5  | GB6B | STAT=Y | PRED= 1.280   | RANGE= 3.000 |
| J59_60 | -11.6290 | J GB6A | GB6B | STAT=Y | PRED= -12.300 | RANGE= 0.800 |
| J59_61 | 5.8943   | J GB6A | OGB6 | STAT=Y | PRED= 4.300   | RANGE= 3.000 |
| J60_61 | 5.3619   | J GB6B | OGB6 | STAT=Y | PRED= 4.300   | RANGE= 3.000 |
| J58_60 | 7.8593   | J GC1  | GC2  | STAT=Y | PRED= 7.190   | RANGE= 3.580 |
| J60_63 | 9.3751   | J GC2  | GC3  | STAT=Y | PRED= 8.920   | RANGE= 3.580 |
| J60_68 | 6.6384   | J GC2  | OGC2 | STAT=Y | PRED= 4.300   | RANGE= 1.000 |
| J63_66 | 8.6451   | J GC3  | GC4  | STAT=Y | PRED= 9.140   | RANGE= 3.580 |
| J63_71 | 4.6778   | J GC3  | OGC3 | STAT=Y | PRED= 4.300   | RANGE= 1.000 |
| J61_66 | 9.1993   | J GC4  | GC5  | STAT=Y | PRED= 10.550  | RANGE= 2.560 |
| J66_72 | 5.0819   | J GC4  | OGC4 | STAT=Y | PRED= 4.300   | RANGE= 1.000 |
| J61_69 | 4.8390   | J GC5  | GC6A | STAT=Y | PRED= 2.700   | RANGE= 3.000 |
| J61_70 | 2.4894   | J GC5  | GC6B | STAT=Y | PRED= 1.280   | RANGE= 3.000 |
| J69_70 | -11.1977 | J GC6A | GC6B | STAT=Y | PRED= -12.300 | RANGE= 0.800 |
| J69_71 | 5.7276   | J GC6A | OGC6 | STAT=Y | PRED= 4.300   | RANGE= 3.000 |
| J70_71 | 5.6674   | J GC6B | OGC6 | STAT=Y | PRED= 4.300   | RANGE= 3.000 |
| J68_80 | 7.9562   | J GD1  | GD2  | STAT=Y | PRED= 7.190   | RANGE= 3.580 |
| J70_73 | 9.0207   | J GD2  | GD3  | STAT=Y | PRED= 8.920   | RANGE= 3.580 |
| J70_78 | 5.1506   | J GD2  | OGD2 | STAT=Y | PRED= 4.300   | RANGE= 1.000 |
| J73_76 | 8.5632   | J GD3  | GD4  | STAT=Y | PRED= 9.140   | RANGE= 3.580 |
| J73_81 | 5.0233   | J GD3  | OGD3 | STAT=Y | PRED= 4.300   | RANGE= 1.000 |
| J71_76 | 9.8494   | J GD4  | GD5  | STAT=Y | PRED= 10.550  | RANGE= 2.560 |
| J76_82 | 5.6049   | J GD4  | OGD4 | STAT=Y | PRED= 4.300   | RANGE= 1.000 |
| J71_79 | 4.6446   | J GD5  | GD6A | STAT=Y | PRED= 2.700   | RANGE= 3.000 |
| J71_80 | 2.3039   | J GD5  | GD6B | STAT=Y | PRED= 1.280   | RANGE= 3.000 |

|        |          |         |        |        |       |         |        |       |
|--------|----------|---------|--------|--------|-------|---------|--------|-------|
| J79_80 | -11.4564 | J GD6A  | GD6B   | STAT=Y | PRED= | -12.300 | RANGE= | 0.800 |
| J79_81 | 6.0898   | J GD6A  | OGD6   | STAT=Y | PRED= | 4.300   | RANGE= | 3.000 |
| J80_81 | 5.7502   | J GD6B  | OGD6   | STAT=Y | PRED= | 4.300   | RANGE= | 3.000 |
| JDMSO1 | 1.7939   | J DMSO  | DMSOD1 | STAT=Y | PRED= | 1.700   | RANGE= | 0.050 |
| JDMSO1 | 1.7939   | J DMSO  | DMSOD2 | STAT=Y | PRED= | 1.700   | RANGE= | 0.050 |
| JETOH1 | 7.0000   | J ETOH1 | ETOH2  | STAT=Y | PRED= | 7.000   | RANGE= | 0.050 |
| JETOH2 | 5.0977   | J ETOH2 | ETOH3  | STAT=Y | PRED= | 5.000   | RANGE= | 0.050 |

CONTROL PARAMETERS:

Solvent = none (def. 99% enriched)  
 1.000 = Concentration (vol%, def=1.0%)  
 0.00100000 = Minimum line-intensity  
 0.00100000 = Diagonalization criterium (not in use)  
 600.12701400 = FIELD(lH,MHz), used to transform shifts to ppms  
 22.47832099 = Left frequency (ppm)  
 -7.49157654 = Right frequency (ppm)  
 0.000 = Acquisition time (s, for QMtls)  
 0.991 = Line-width (for modes D, P & T, 0=use defaults)  
 0.068609924 = Data-point resolution (Hz)  
 63.801 = GAUSSIAN (% , 0=use default from INF)  
 -2.951 = Dispersion contribution (% , 0=use default from INF)  
 0.00000000 = Decoupling frequency (for DORES)

CONSTRAINTS (in equations X0 = 1.0)...use no empty lines

EQUAL DMSOD1 = DMSOD2  
 1.000 \* 1.0 = -41.020 \* 1.0 - 1.000 \* 1.0  
 10.000 \* 1.0 = -38.340 \* 1.0 - 1.000 \* 1.0  
 11.000 \* 1.0 = -16.670 \* 1.0 - 1.000 \* 1.0  
 12.000 \* 1.0 = -36.870 \* 1.0 - 1.000 \* 1.0  
 13.000 \* 1.0 = -80.200 \* 1.0 - 1.000 \* 1.0  
 14.000 \* 1.0 = -49.010 \* 1.0 - 1.000 \* 1.0  
 15.000 \* 1.0 = -48.090 \* 1.0 - 1.000 \* 1.0  
 16.0 \* 1.0 = -153.1 \* 1.0 - 1.0 \* 1.0  
 17.0 \* 1.0 = -104.2 \* 1.0 - 1.0 \* 1.0  
 18.000 \* 1.0 = -28.210 \* 1.0 - 1.000 \* 1.0  
 19.0 \* 1.0 = -185.4 \* 1.0 - 1.0 \* 1.0  
 2.000 \* 1.0 = -19.040 \* 1.0 - 1.000 \* 1.0  
 20.000 \* 1.0 = -14.770 \* 1.0 - 1.000 \* 1.0  
 3.000 \* 1.0 = -37.520 \* 1.0 - 1.000 \* 1.0  
 4.000 \* 1.0 = -43.240 \* 1.0 - 1.000 \* 1.0  
 5.000 \* 1.0 = -55.060 \* 1.0 - 1.000 \* 1.0  
 6.000 \* 1.0 = -21.840 \* 1.0 - 1.000 \* 1.0  
 7.000 \* 1.0 = -40.820 \* 1.0 - 1.000 \* 1.0  
 8.000 \* 1.0 = -42.640 \* 1.0 - 1.000 \* 1.0  
 9.000 \* 1.0 = -55.850 \* 1.0 - 1.000 \* 1.0

END of FILE

**S12.** The  $^1\text{H}$  fingerprint of rebaudioside A (**6**) in  $\text{DMSO-}d_6$  (23 mM, 600 MHz, 298 K). The calculated and observed NMR spectra are shown in red and blue, respectively.

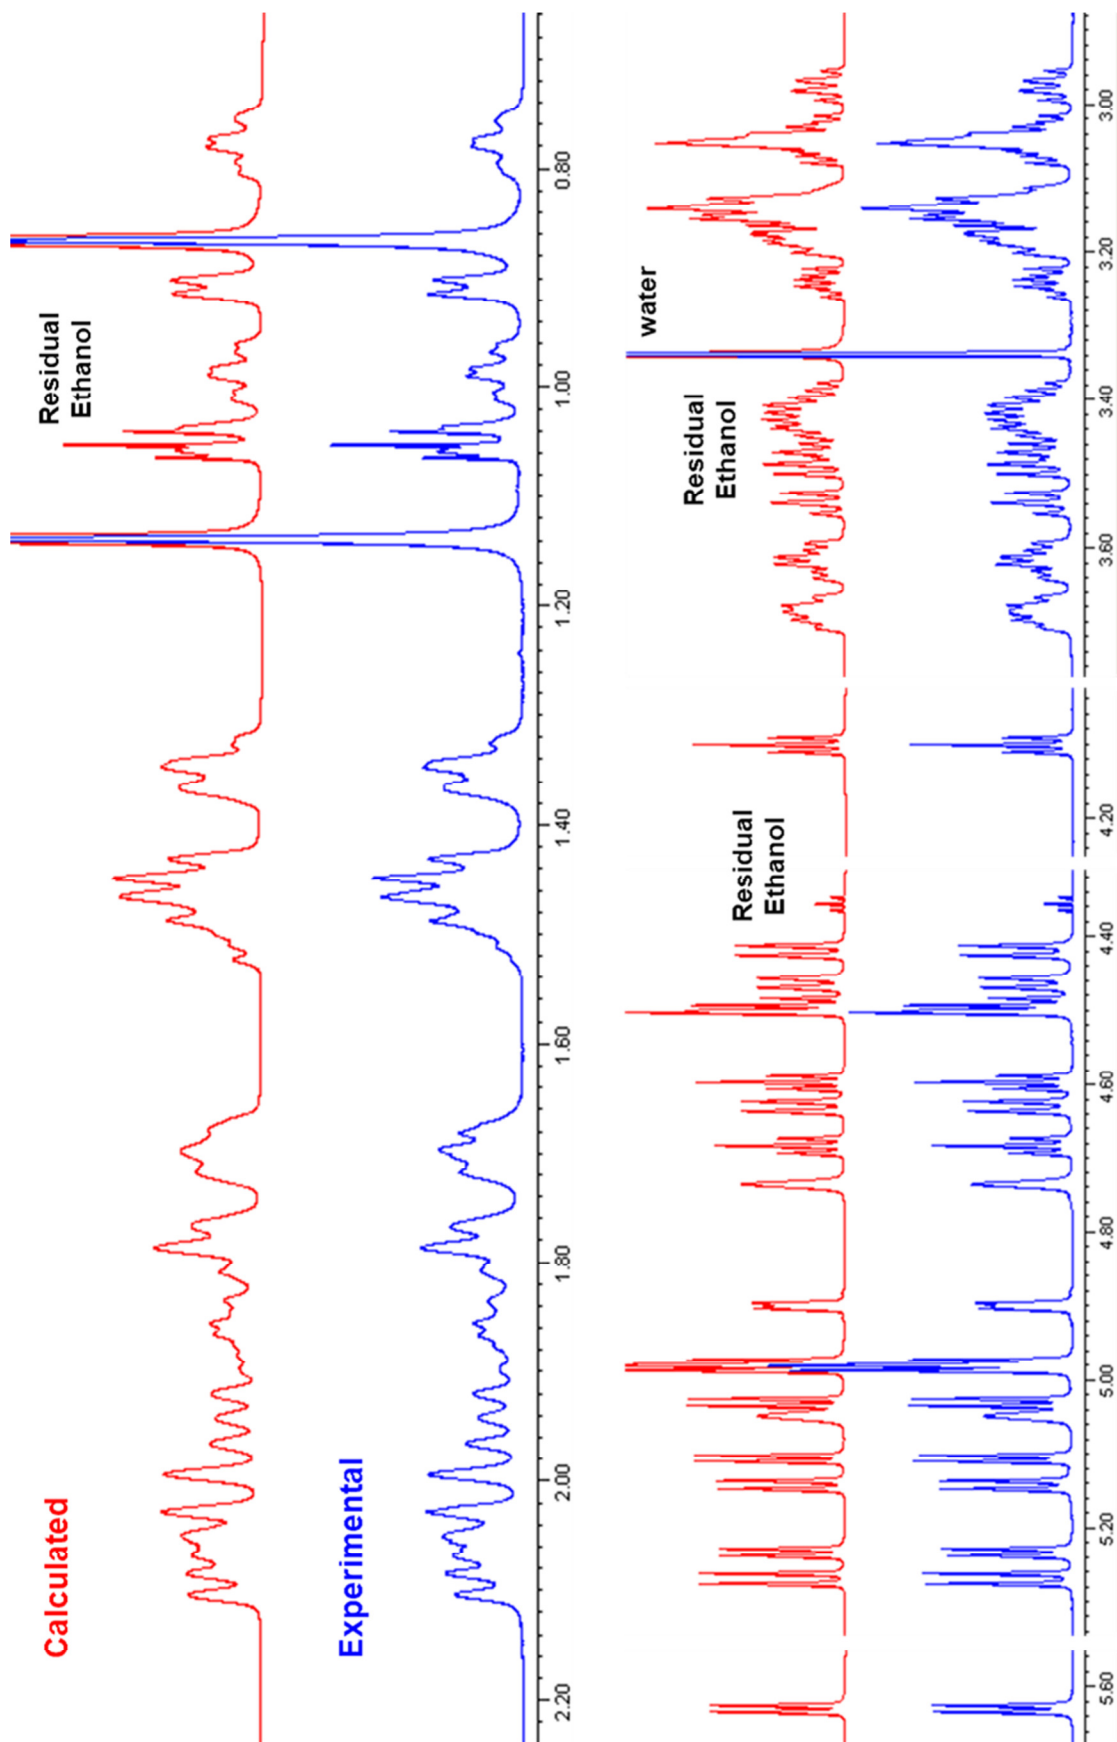

### S13. The HiFSA profile of rebaudioside B (7) in DMSO-*d*<sub>6</sub> [in PERCH parameter (.pms) file format].

\* NEW: the lines beginning by \* are comment lines !  
 \* To keep all the chemical shifts fixed during iteration  
 \* replace "CHEMICAL SHIFTS(HZ):" by "...SHIFTS(HZ): fixed"  
 \* The couplings can be fixed in the same way

NMR-data: c:\HIFSA\Stevia\RebB  
 #\$\$ Date 10.10.2014; Time 22:21:16 rebB.pms

#### CHEMICAL SHIFTS (PPM):

| PROTON | 2*SPIN= | 1 SPECIES=1H | POPULATION(Y)= | 0.05345 |        |              |              |                 |                 |           |
|--------|---------|--------------|----------------|---------|--------|--------------|--------------|-----------------|-----------------|-----------|
| H1A    | /       | 1            | 0.775844       | 1*1*1   | STAT=Y | PRED= 0.779  | RANGE= 0.050 | WIDTH(Y)= 3.120 | RESP(Y)= 0.9579 | HSQC= C1  |
| H1B    | /       | 1            | 1.788191       | 1*1*1   | STAT=Y | PRED= 1.778  | RANGE= 0.050 | WIDTH(Y)= 3.881 | RESP(Y)= 0.9901 | HSQC= C1  |
| H2A    | /       | 1            | 1.769866       | 1*1*1   | STAT=Y | PRED= 1.764  | RANGE= 0.050 | WIDTH(Y)= 3.927 | RESP(Y)= 0.9034 | HSQC= C2  |
| H2B    | /       | 1            | 1.339855       | 1*1*1   | STAT=Y | PRED= 1.332  | RANGE= 0.050 | WIDTH(Y)= 2.967 | RESP(Y)= 0.9269 | HSQC= C2  |
| H3A    | /       | 1            | 2.008302       | 1*1*1   | STAT=Y | PRED= 2.000  | RANGE= 0.050 | WIDTH(Y)= 3.427 | RESP(Y)= 0.9312 | HSQC= C3  |
| H3B    | /       | 1            | 0.928436       | 1*1*1   | STAT=Y | PRED= 0.932  | RANGE= 0.050 | WIDTH(Y)= 3.699 | RESP(Y)= 0.9292 | HSQC= C3  |
| H5A    | /       | 1            | 1.004385       | 1*1*1   | STAT=Y | PRED= 1.015  | RANGE= 0.050 | WIDTH(Y)= 3.476 | RESP(Y)= 0.9664 | HSQC= C5  |
| H6A    | /       | 1            | 1.718759       | 1*1*1   | STAT=Y | PRED= 1.700  | RANGE= 0.050 | WIDTH(Y)= 4.710 | RESP(Y)= 0.9192 | HSQC= C6  |
| H6B    | /       | 1            | 1.742223       | 1*1*1   | STAT=Y | PRED= 1.737  | RANGE= 0.050 | WIDTH(Y)= 4.667 | RESP(Y)= 0.9360 | HSQC= C6  |
| H7A    | /       | 1            | 1.361382       | 1*1*1   | STAT=Y | PRED= 1.360  | RANGE= 0.050 | WIDTH(Y)= 4.050 | RESP(Y)= 0.9031 | HSQC= C7  |
| H7B    | /       | 1            | 1.437099       | 1*1*1   | STAT=Y | PRED= 1.449  | RANGE= 0.050 | WIDTH(Y)= 4.037 | RESP(Y)= 0.9915 | HSQC= C7  |
| H9A    | /       | 1            | 0.925089       | 1*1*1   | STAT=Y | PRED= 0.921  | RANGE= 0.050 | WIDTH(Y)= 4.015 | RESP(Y)= 0.9761 | HSQC= C9  |
| H11A   | /       | 1            | 1.694365       | 1*1*1   | STAT=Y | PRED= 1.651  | RANGE= 0.050 | WIDTH(Y)= 4.208 | RESP(Y)= 0.9509 | HSQC= C11 |
| H11B   | /       | 1            | 1.501259       | 1*1*1   | STAT=Y | PRED= 1.429  | RANGE= 0.050 | WIDTH(Y)= 4.146 | RESP(Y)= 0.9007 | HSQC= C11 |
| H12A   | /       | 1            | 1.475871       | 1*1*1   | STAT=Y | PRED= 1.348  | RANGE= 0.025 | WIDTH(Y)= 3.934 | RESP(Y)= 1.0000 | HSQC= C12 |
| H12B   | /       | 1            | 1.836642       | 1*1*1   | STAT=Y | PRED= 1.599  | RANGE= 0.050 | WIDTH(Y)= 3.765 | RESP(Y)= 0.9451 | HSQC= C12 |
| H14A   | /       | 1            | 2.059247       | 1*1*1   | STAT=Y | PRED= 1.869  | RANGE= 0.455 | WIDTH(Y)= 4.087 | RESP(Y)= 0.9685 | HSQC= C14 |
| H14B   | /       | 1            | 1.428830       | 1*1*1   | STAT=Y | PRED= 1.192  | RANGE= 0.050 | WIDTH(Y)= 3.770 | RESP(Y)= 0.9764 | HSQC= C14 |
| H15A   | /       | 1            | 1.985623       | 1*1*1   | STAT=Y | PRED= 2.023  | RANGE= 0.050 | WIDTH(Y)= 4.279 | RESP(Y)= 0.9421 | HSQC= C15 |
| H15B   | /       | 1            | 2.050203       | 1*1*1   | STAT=Y | PRED= 2.052  | RANGE= 0.050 | WIDTH(Y)= 3.769 | RESP(Y)= 0.9264 | HSQC= C15 |
| H17A   | /       | 1            | 5.125521       | 1*1*1   | STAT=Y | PRED= 4.878  | RANGE= 0.025 | WIDTH(Y)= 3.832 | RESP(Y)= 0.9638 | HSQC= C17 |
| H17B   | /       | 1            | 4.756877       | 1*1*1   | STAT=Y | PRED= 4.687  | RANGE= 0.025 | WIDTH(Y)= 3.782 | RESP(Y)= 0.9720 | HSQC= C17 |
| H18B   | /       | 1            | 1.102598       | 1*1*3   | STAT=Y | PRED= 1.101  | RANGE= 0.050 | WIDTH(Y)= 2.936 | RESP(Y)= 0.9314 | HSQC= C18 |
| H20B   | /       | 1            | 0.872515       | 1*1*3   | STAT=Y | PRED= 0.866  | RANGE= 0.050 | WIDTH(Y)= 3.555 | RESP(Y)= 0.9416 | HSQC= C20 |
| H22A   | /       | 1            | 11.984351      | 1*1*1   | STAT=Y | PRED= 11.981 | RANGE= 0.050 | WIDTH(Y)= 6.451 | RESP(Y)= 0.7926 |           |
| GB1    | /       | 1            | 4.493111       | 1*1*1   | STAT=Y | PRED= 5.565  | RANGE= 0.342 | WIDTH(Y)= 2.238 | RESP(Y)= 0.9078 | HSQC= H21 |
| GB2    | /       | 1            | 3.457088       | 1*1*1   | STAT=Y | PRED= 3.526  | RANGE= 0.200 | WIDTH(Y)= 1.964 | RESP(Y)= 0.9171 | HSQC= C23 |
| GB3    | /       | 1            | 3.549127       | 1*1*1   | STAT=Y | PRED= 3.317  | RANGE= 0.155 | WIDTH(Y)= 2.053 | RESP(Y)= 0.8548 | HSQC= C26 |
| GB4    | /       | 1            | 3.203939       | 1*1*1   | STAT=Y | PRED= 3.387  | RANGE= 0.287 | WIDTH(Y)= 1.753 | RESP(Y)= 0.8374 | HSQC= C27 |
| GB5    | /       | 1            | 3.094971       | 1*1*1   | STAT=Y | PRED= 3.485  | RANGE= 0.247 | WIDTH(Y)= 2.090 | RESP(Y)= 0.8314 | HSQC= C25 |
| GB6A   | /       | 1            | 3.407142       | 1*1*1   | STAT=Y | PRED= 3.351  | RANGE= 0.450 | WIDTH(Y)= 1.996 | RESP(Y)= 0.8318 | HSQC= C29 |
| GB6B   | /       | 1            | 3.643427       | 1*1*1   | STAT=Y | PRED= 3.509  | RANGE= 0.232 | WIDTH(Y)= 2.367 | RESP(Y)= 0.8536 | HSQC= C29 |
| OGB4   | /       | 1            | 4.489201       | 1*1*1   | STAT=Y | PRED= 4.702  | RANGE= 1.565 | WIDTH(Y)= 1.532 | RESP(Y)= 0.8679 |           |
| OGB6   | /       | 1            | 4.436331       | 1*1*1   | STAT=Y | PRED= 5.633  | RANGE= 1.215 | WIDTH(Y)= 1.650 | RESP(Y)= 0.8978 |           |
| GC1    | /       | 1            | 4.653912       | 1*1*1   | STAT=Y | PRED= 5.565  | RANGE= 0.342 | WIDTH(Y)= 2.082 | RESP(Y)= 0.9078 | HSQC= H21 |
| GC2    | /       | 1            | 2.911058       | 1*1*1   | STAT=Y | PRED= 3.526  | RANGE= 0.200 | WIDTH(Y)= 2.144 | RESP(Y)= 0.9171 | HSQC= C23 |
| GC3    | /       | 1            | 3.132942       | 1*1*1   | STAT=Y | PRED= 3.317  | RANGE= 0.155 | WIDTH(Y)= 2.110 | RESP(Y)= 0.8548 | HSQC= C26 |
| GC4    | /       | 1            | 2.986647       | 1*1*1   | STAT=Y | PRED= 3.387  | RANGE= 0.287 | WIDTH(Y)= 2.082 | RESP(Y)= 0.8374 | HSQC= C27 |
| GC5    | /       | 1            | 3.080448       | 1*1*1   | STAT=Y | PRED= 3.485  | RANGE= 0.247 | WIDTH(Y)= 2.063 | RESP(Y)= 0.8314 | HSQC= C25 |
| GC6A   | /       | 1            | 3.430941       | 1*1*1   | STAT=Y | PRED= 3.351  | RANGE= 0.450 | WIDTH(Y)= 2.561 | RESP(Y)= 0.8318 | HSQC= C29 |
| GC6B   | /       | 1            | 3.591710       | 1*1*1   | STAT=Y | PRED= 3.509  | RANGE= 0.232 | WIDTH(Y)= 2.385 | RESP(Y)= 0.8536 | HSQC= C29 |
| OGC2   | /       | 1            | 5.159273       | 1*1*1   | STAT=Y | PRED= 5.633  | RANGE= 1.215 | WIDTH(Y)= 1.674 | RESP(Y)= 0.8978 |           |
| OGC3   | /       | 1            | 4.857861       | 1*1*1   | STAT=Y | PRED= 4.296  | RANGE= 1.420 | WIDTH(Y)= 1.983 | RESP(Y)= 0.8798 |           |
| OGC4   | /       | 1            | 4.853732       | 1*1*1   | STAT=Y | PRED= 4.702  | RANGE= 1.565 | WIDTH(Y)= 1.572 | RESP(Y)= 0.8679 |           |
| OGC6   | /       | 1            | 4.047087       | 1*1*1   | STAT=Y | PRED= 5.633  | RANGE= 1.215 | WIDTH(Y)= 1.584 | RESP(Y)= 0.8978 |           |
| GD1    | /       | 1            | 4.423299       | 1*1*1   | STAT=Y | PRED= 5.565  | RANGE= 0.342 | WIDTH(Y)= 2.010 | RESP(Y)= 0.9078 | HSQC= H21 |
| GD2    | /       | 1            | 3.036506       | 1*1*1   | STAT=Y | PRED= 3.526  | RANGE= 0.200 | WIDTH(Y)= 1.773 | RESP(Y)= 0.9171 | HSQC= C23 |
| GD3    | /       | 1            | 3.144461       | 1*1*1   | STAT=Y | PRED= 3.317  | RANGE= 0.155 | WIDTH(Y)= 1.679 | RESP(Y)= 0.8548 | HSQC= C26 |
| GD4    | /       | 1            | 3.067099       | 1*1*1   | STAT=Y | PRED= 3.387  | RANGE= 0.287 | WIDTH(Y)= 1.848 | RESP(Y)= 0.8374 | HSQC= C27 |
| GD5    | /       | 1            | 3.184629       | 1*1*1   | STAT=Y | PRED= 3.485  | RANGE= 0.247 | WIDTH(Y)= 1.991 | RESP(Y)= 0.8314 | HSQC= C25 |
| GD6A   | /       | 1            | 3.399675       | 1*1*1   | STAT=Y | PRED= 3.351  | RANGE= 0.450 | WIDTH(Y)= 2.226 | RESP(Y)= 0.8318 | HSQC= C29 |
| GD6B   | /       | 1            | 3.690730       | 1*1*1   | STAT=Y | PRED= 3.509  | RANGE= 0.232 | WIDTH(Y)= 2.085 | RESP(Y)= 0.8536 | HSQC= C29 |
| OGD2   | /       | 1            | 5.628404       | 1*1*1   | STAT=Y | PRED= 5.633  | RANGE= 1.215 | WIDTH(Y)= 1.594 | RESP(Y)= 0.8978 |           |
| OGD3   | /       | 1            | 5.096671       | 1*1*1   | STAT=Y | PRED= 4.296  | RANGE= 1.420 | WIDTH(Y)= 1.459 | RESP(Y)= 0.8798 |           |
| OGD4   | /       | 1            | 5.028968       | 1*1*1   | STAT=Y | PRED= 4.702  | RANGE= 1.565 | WIDTH(Y)= 1.424 | RESP(Y)= 0.8679 |           |
| OGD6   | /       | 1            | 4.595012       | 1*1*1   | STAT=Y | PRED= 5.633  | RANGE= 1.215 | WIDTH(Y)= 1.550 | RESP(Y)= 0.8978 |           |

| DMSO_CH | 2*SPIN= | 1 SPECIES=1H | POPULATION(Y)= | 0.79946 |               |              |                 |                 |                 |
|---------|---------|--------------|----------------|---------|---------------|--------------|-----------------|-----------------|-----------------|
| DMSO    | /       | 2            | 2.500032       | 1*1*1   | STAT=Y        | PRED= 2.500  | RANGE= 0.050    | WIDTH(Y)= 1.268 | RESP(Y)= 1.0000 |
| DMSO_D  | 2*SPIN= | 2 SPECIES=2D | POPULATION(Y)= | 0.79946 |               |              |                 |                 |                 |
| DMSOD1/ | 2       | -100.000001  | 1*1*1          | STAT=Y  | PRED= -99.999 | RANGE= 0.050 | WIDTH(Y)= 1.500 | RESP(Y)= 1.0000 |                 |
| DMSOD2/ | 2       | -100.000001  | 1*1*1          | STAT=Y  | PRED= -99.999 | RANGE= 0.050 | WIDTH(Y)= 1.500 | RESP(Y)= 1.0000 |                 |
| WATER_H | 2*SPIN= | 1 SPECIES=1H | POPULATION(Y)= | 0.14709 |               |              |                 |                 |                 |
| WATER   | /       | 3            | 3.336154       | 2*1*1   | STAT=Y        | PRED= 3.338  | RANGE= 0.050    | WIDTH(Y)= 1.302 | RESP(Y)= 1.0000 |

#### COUPLING CONSTANTS (HZ):

|        |          |   |     |      |        |               |              |
|--------|----------|---|-----|------|--------|---------------|--------------|
| J12_13 | -12.0306 | J | H1A | H1B  | STAT=Y | PRED= -13.130 | RANGE= 1.500 |
| J17_12 | 14.2935  | J | H1A | H2A  | STAT=Y | PRED= 12.550  | RANGE= 2.560 |
| J12_18 | 4.9450   | J | H1A | H2B  | STAT=Y | PRED= 4.380   | RANGE= 3.800 |
| J14_12 | -0.1780  | J | H1A | H20B | STAT=Y | PRED= -0.790  | RANGE= 0.400 |
| J17_13 | 3.8064   | J | H1B | H2A  | STAT=Y | PRED= 3.880   | RANGE= 3.800 |
| J13_18 | 3.0622   | J | H1B | H2B  | STAT=Y | PRED= 2.510   | RANGE= 2.800 |
| J13_19 | 2.8669   | J | H1B | H3A  | STAT=Y | PRED= 2.850   | RANGE= 1.280 |
| J17_18 | -12.7266 | J | H2A | H2B  | STAT=Y | PRED= -13.190 | RANGE= 1.500 |
| J17_19 | 3.5299   | J | H2A | H3A  | STAT=Y | PRED= 3.860   | RANGE= 3.800 |



|        |          |        |        |        |               |              |
|--------|----------|--------|--------|--------|---------------|--------------|
| J17_20 | 13.4122  | J H2A  | H3B    | STAT=Y | PRED= 12.570  | RANGE= 2.560 |
| J19_18 | 2.1457   | J H2B  | H3A    | STAT=Y | PRED= 2.530   | RANGE= 2.800 |
| J20_18 | 4.5718   | J H2B  | H3B    | STAT=Y | PRED= 4.310   | RANGE= 3.800 |
| J19_20 | -12.5550 | J H3A  | H3B    | STAT=Y | PRED= -13.110 | RANGE= 1.500 |
| J21_22 | 11.8210  | J H5A  | H6A    | STAT=Y | PRED= 12.550  | RANGE= 2.560 |
| J21_23 | 2.3659   | J H5A  | H6B    | STAT=Y | PRED= 1.710   | RANGE= 2.800 |
| J22_23 | -13.8083 | J H6A  | H6B    | STAT=Y | PRED= -13.190 | RANGE= 1.500 |
| J22_24 | 14.7294  | J H6A  | H7A    | STAT=Y | PRED= 12.990  | RANGE= 2.560 |
| J22_25 | 3.7816   | J H6A  | H7B    | STAT=Y | PRED= 3.320   | RANGE= 3.800 |
| J23_24 | 3.5067   | J H6B  | H7A    | STAT=Y | PRED= 3.410   | RANGE= 3.800 |
| J23_25 | 5.7672   | J H6B  | H7B    | STAT=Y | PRED= 3.190   | RANGE= 3.800 |
| J24_25 | -11.8882 | J H7A  | H7B    | STAT=Y | PRED= -13.130 | RANGE= 1.500 |
| J26_1  | 0.9744   | J H9A  | H11A   | STAT=Y | PRED= 0.490   | RANGE= 2.800 |
| J26_2  | 7.9560   | J H9A  | H11B   | STAT=Y | PRED= 9.030   | RANGE= 3.580 |
| J26_6  | 0.0399   | J H9A  | H14B   | STAT=Y | PRED= 2.290   | RANGE= 1.100 |
| J1_2   | -15.0885 | J H11A | H11B   | STAT=Y | PRED= -13.010 | RANGE= 1.500 |
| J3_1   | 1.9258   | J H11A | H12A   | STAT=Y | PRED= 1.040   | RANGE= 2.800 |
| J4_1   | 6.0978   | J H11A | H12B   | STAT=Y | PRED= 6.480   | RANGE= 3.800 |
| J3_2   | 2.6706   | J H11B | H12A   | STAT=Y | PRED= 6.890   | RANGE= 3.800 |
| J4_2   | 14.0330  | J H11B | H12B   | STAT=Y | PRED= 11.180  | RANGE= 2.800 |
| J3_4   | -11.4094 | J H12A | H12B   | STAT=Y | PRED= -12.880 | RANGE= 1.500 |
| J3_6   | 3.2469   | J H12A | H14B   | STAT=Y | PRED= 2.670   | RANGE= 1.280 |
| J5_6   | -12.0137 | J H14A | H14B   | STAT=Y | PRED= -12.450 | RANGE= 2.000 |
| J7_5   | 3.0003   | J H14A | H15A   | STAT=Y | PRED= 1.650   | RANGE= 1.280 |
| J7_8   | -16.1340 | J H15A | H15B   | STAT=Y | PRED= -14.390 | RANGE= 3.000 |
| J7_9   | -1.6209  | J H15A | H17A   | STAT=Y | PRED= -2.030  | RANGE= 1.000 |
| J7_10  | -0.0375  | J H15A | H17B   | STAT=Y | PRED= -1.900  | RANGE= 0.950 |
| J9_8   | -2.9809  | J H15B | H17A   | STAT=Y | PRED= -2.420  | RANGE= 1.200 |
| J10_8  | -2.4552  | J H15B | H17B   | STAT=Y | PRED= -2.140  | RANGE= 1.100 |
| J9_10  | 0.4415   | J H17A | H17B   | STAT=Y | PRED= 2.980   | RANGE= 4.000 |
| J48_50 | 7.6703   | J GB1  | GB2    | STAT=Y | PRED= 7.190   | RANGE= 3.580 |
| J50_53 | 9.0623   | J GB2  | GB3    | STAT=Y | PRED= 8.920   | RANGE= 3.580 |
| J53_56 | 8.6956   | J GB3  | GB4    | STAT=Y | PRED= 9.140   | RANGE= 3.580 |
| J51_56 | 9.6569   | J GB4  | GB5    | STAT=Y | PRED= 10.550  | RANGE= 2.560 |
| J56_62 | 2.3149   | J GB4  | OGB4   | STAT=Y | PRED= 4.300   | RANGE= 1.000 |
| J51_59 | 5.2987   | J GB5  | GB6A   | STAT=Y | PRED= 2.700   | RANGE= 3.000 |
| J51_60 | 2.2884   | J GB5  | GB6B   | STAT=Y | PRED= 1.280   | RANGE= 3.000 |
| J59_60 | -11.0725 | J GB6A | GB6B   | STAT=Y | PRED= -12.300 | RANGE= 0.800 |
| J59_61 | 6.4043   | J GB6A | OGB6   | STAT=Y | PRED= 4.300   | RANGE= 3.000 |
| J60_61 | 5.6097   | J GB6B | OGB6   | STAT=Y | PRED= 4.300   | RANGE= 3.000 |
| J58_60 | 7.8767   | J GC1  | GC2    | STAT=Y | PRED= 7.190   | RANGE= 3.580 |
| J60_63 | 9.2543   | J GC2  | GC3    | STAT=Y | PRED= 8.920   | RANGE= 3.580 |
| J60_68 | 6.8804   | J GC2  | OGC2   | STAT=Y | PRED= 4.300   | RANGE= 1.000 |
| J63_66 | 8.7537   | J GC3  | GC4    | STAT=Y | PRED= 9.140   | RANGE= 3.580 |
| J63_71 | 4.5877   | J GC3  | OGC3   | STAT=Y | PRED= 4.300   | RANGE= 1.000 |
| J61_66 | 9.5810   | J GC4  | GC5    | STAT=Y | PRED= 10.550  | RANGE= 2.560 |
| J66_72 | 5.2996   | J GC4  | OGC4   | STAT=Y | PRED= 4.300   | RANGE= 1.000 |
| J61_69 | 5.8522   | J GC5  | GC6A   | STAT=Y | PRED= 2.700   | RANGE= 3.000 |
| J61_70 | 2.3560   | J GC5  | GC6B   | STAT=Y | PRED= 1.280   | RANGE= 3.000 |
| J69_70 | -11.6137 | J GC6A | GC6B   | STAT=Y | PRED= -12.300 | RANGE= 0.800 |
| J69_71 | 5.7485   | J GC6A | OGC6   | STAT=Y | PRED= 4.300   | RANGE= 3.000 |
| J70_71 | 5.5199   | J GC6B | OGC6   | STAT=Y | PRED= 4.300   | RANGE= 3.000 |
| J68_80 | 7.8998   | J GD1  | GD2    | STAT=Y | PRED= 7.190   | RANGE= 3.580 |
| J70_73 | 9.1681   | J GD2  | GD3    | STAT=Y | PRED= 8.920   | RANGE= 3.580 |
| J70_78 | 5.3896   | J GD2  | OGD2   | STAT=Y | PRED= 4.300   | RANGE= 1.000 |
| J73_76 | 8.7266   | J GD3  | GD4    | STAT=Y | PRED= 9.140   | RANGE= 3.580 |
| J73_81 | 5.0034   | J GD3  | OGD3   | STAT=Y | PRED= 4.300   | RANGE= 1.000 |
| J71_76 | 9.6876   | J GD4  | GD5    | STAT=Y | PRED= 10.550  | RANGE= 2.560 |
| J76_82 | 5.6068   | J GD4  | OGD4   | STAT=Y | PRED= 4.300   | RANGE= 1.000 |
| J71_79 | 6.5514   | J GD5  | GD6A   | STAT=Y | PRED= 2.700   | RANGE= 3.000 |
| J71_80 | 2.2039   | J GD5  | GD6B   | STAT=Y | PRED= 1.280   | RANGE= 3.000 |
| J79_80 | -11.4550 | J GD6A | GD6B   | STAT=Y | PRED= -12.300 | RANGE= 0.800 |
| J79_81 | 5.6231   | J GD6A | OGD6   | STAT=Y | PRED= 4.300   | RANGE= 3.000 |
| J80_81 | 4.8995   | J GD6B | OGD6   | STAT=Y | PRED= 4.300   | RANGE= 3.000 |
| JDMSO1 | 1.7939   | J DMSO | DMSOD1 | STAT=Y | PRED= 1.700   | RANGE= 0.050 |
| JDMSO1 | 1.7939   | J DMSO | DMSOD2 | STAT=Y | PRED= 1.700   | RANGE= 0.050 |

CONTROL PARAMETERS:

Solvent = none (def. 99% enriched)  
 1.000 = Concentration (vol%, def=1.0%)  
 0.00100000 = Minimum line-intensity  
 0.00100000 = Diagonalization criterium (not in use)  
 600.12701400 = FIELD(1H,MHz), used to transform shifts to ppms  
 22.47832099 = Left frequency (ppm)  
 -7.49157654 = Right frequency (ppm)  
 0.000 = Acquisition time (s, for QMTLs)  
 1.268 = Line-width (for modes D, P & T, 0=use defaults)  
 0.068609924 = Data-point resolution (Hz)  
 50.067 = GAUSSIAN (% , 0=use default from INF)  
 -3.799 = Dispersion contribution (% , 0=use default from INF)  
 0.00000000 = Decoupling frequency (for DORES)

CONSTRAINTS (in equations X0 = 1.0)...use no empty lines

EQUAL DMSOD1 = DMSOD2  
 1.000 \* 1.0 = -41.020 \* 1.0 - 1.000 \* 1.0  
 10.000 \* 1.0 = -38.340 \* 1.0 - 1.000 \* 1.0  
 11.000 \* 1.0 = -16.670 \* 1.0 - 1.000 \* 1.0

12.000 \* 1.0 = -36.870 \* 1.0 - 1.000 \* 1.0  
13.000 \* 1.0 = -80.200 \* 1.0 - 1.000 \* 1.0  
14.000 \* 1.0 = -49.010 \* 1.0 - 1.000 \* 1.0  
15.000 \* 1.0 = -48.090 \* 1.0 - 1.000 \* 1.0  
16.0 \* 1.0 = -153.1 \* 1.0 - 1.0 \* 1.0  
17.0 \* 1.0 = -104.2 \* 1.0 - 1.0 \* 1.0  
18.000 \* 1.0 = -28.210 \* 1.0 - 1.000 \* 1.0  
19.0 \* 1.0 = -185.4 \* 1.0 - 1.0 \* 1.0  
2.000 \* 1.0 = -19.040 \* 1.0 - 1.000 \* 1.0  
20.000 \* 1.0 = -14.770 \* 1.0 - 1.000 \* 1.0  
3.000 \* 1.0 = -37.520 \* 1.0 - 1.000 \* 1.0  
4.000 \* 1.0 = -43.240 \* 1.0 - 1.000 \* 1.0  
5.000 \* 1.0 = -55.060 \* 1.0 - 1.000 \* 1.0  
6.000 \* 1.0 = -21.840 \* 1.0 - 1.000 \* 1.0  
7.000 \* 1.0 = -40.820 \* 1.0 - 1.000 \* 1.0  
8.000 \* 1.0 = -42.640 \* 1.0 - 1.000 \* 1.0  
9.000 \* 1.0 = -55.850 \* 1.0 - 1.000 \* 1.0

END of FILE

**S14.** The  $^1\text{H}$  fingerprint of rebaudioside B (**7**) in  $\text{DMSO-}d_6$  (26 mM, 600 MHz, 298 K). The calculated and observed NMR spectra are shown in red and blue, respectively.

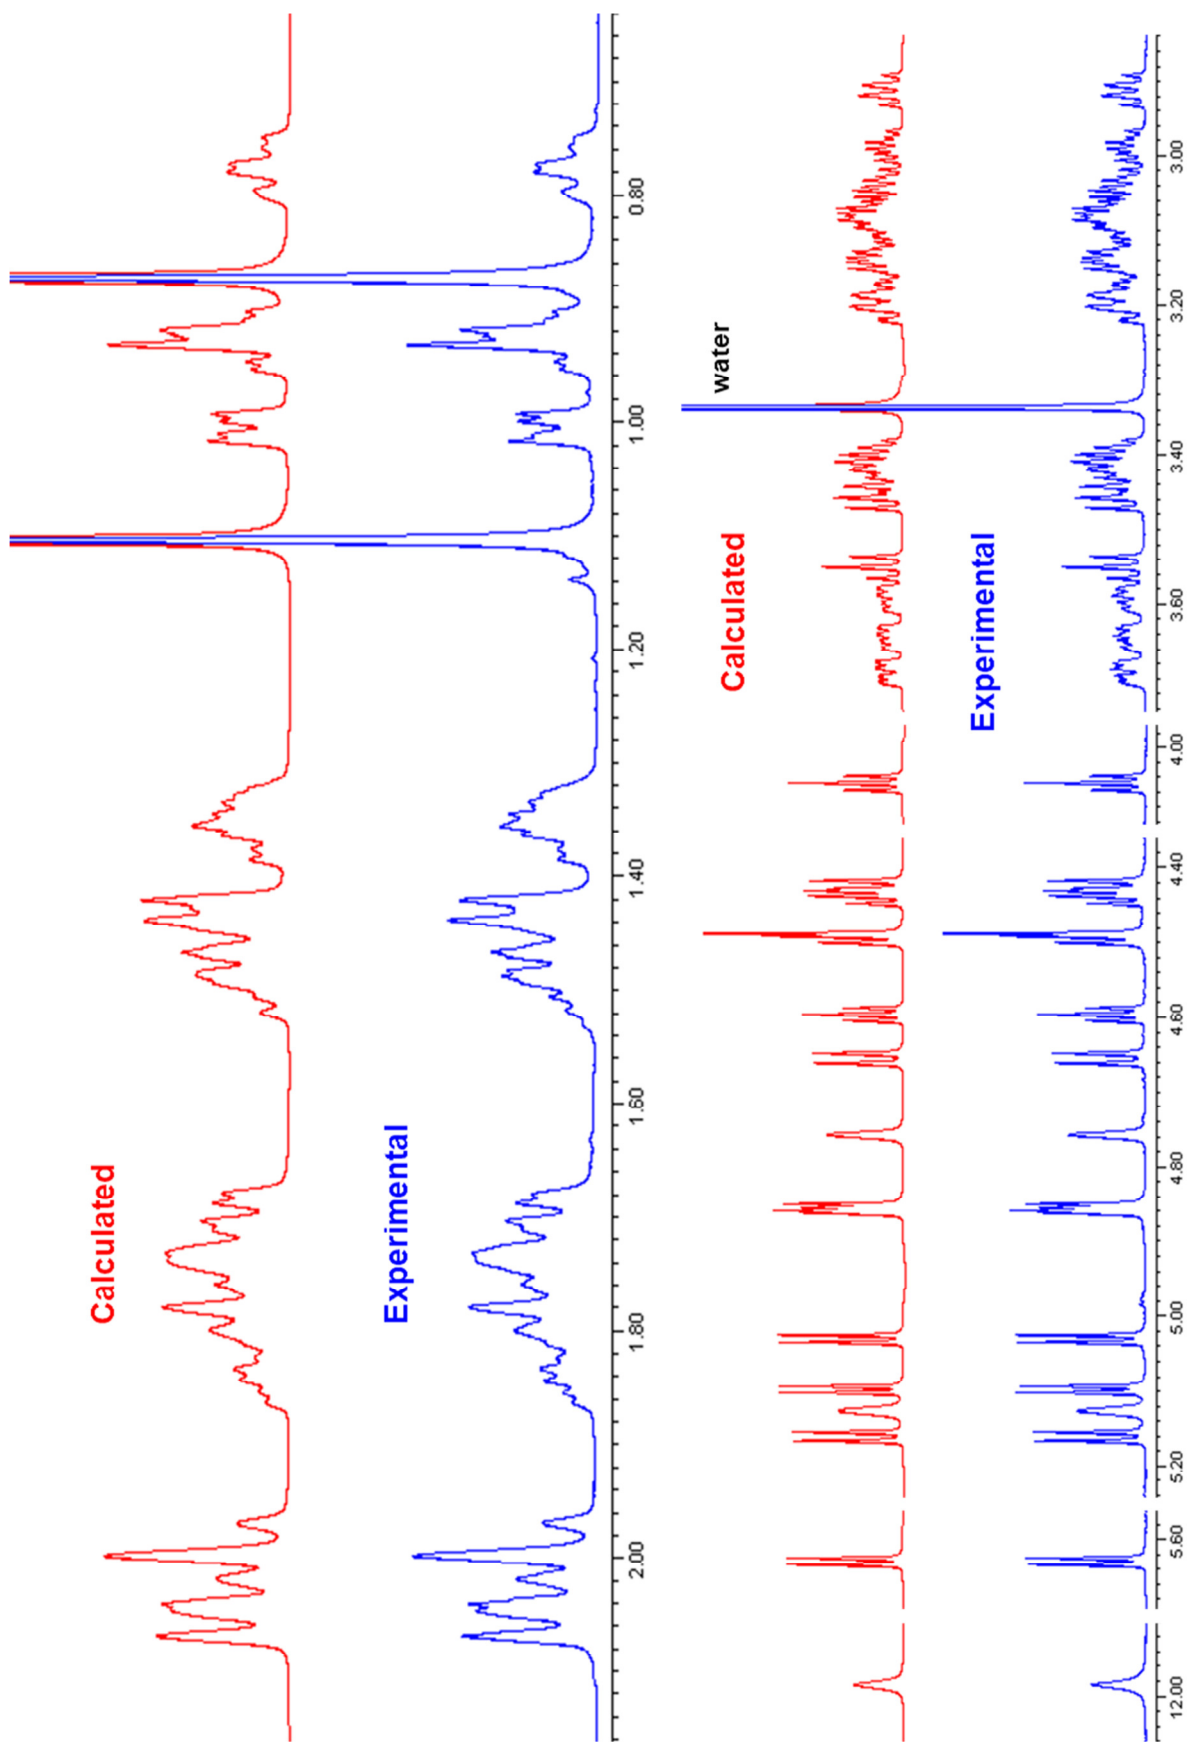

# S15. The HiFSA profile of rebaudioside C (8) in DMSO-*d*<sub>6</sub> [in PERCH parameter (.pms) file format].

\* NEW: the lines beginning by \* are comment lines !  
 \* To keep all the chemical shifts fixed during iteration  
 \* replace "CHEMICAL SHIFTS(HZ):" by "...SHIFTS(HZ): fixed"  
 \* The couplings can be fixed in the same way

NMR-data: c:\HIFSA\Stevia\RebC  
 #\$\$ Date 10.10.2014; Time 22:25:29 rebC.pms

```
CHEMICAL SHIFTS (PPM) :
PROTON      2*SPIN= 1 SPECIES=1H      POPULATION(Y)= 0.07508
H1A / 1      0.768130 1*1*1  STAT=Y  PRED= 0.779 RANGE= 0.050 WIDTH(Y)= 6.377 RESP(Y)= 0.9579 HSQC= C1
H1B / 1      1.773877 1*1*1  STAT=Y  PRED= 1.778 RANGE= 0.050 WIDTH(Y)= 6.057 RESP(Y)= 0.9901 HSQC= C1
H2A / 1      1.797458 1*1*1  STAT=Y  PRED= 1.764 RANGE= 0.050 WIDTH(Y)= 5.239 RESP(Y)= 0.9034 HSQC= C2
H2B / 1      1.351259 1*1*1  STAT=Y  PRED= 1.332 RANGE= 0.050 WIDTH(Y)= 4.089 RESP(Y)= 0.9269 HSQC= C2
H3A / 1      2.046577 1*1*1  STAT=Y  PRED= 2.000 RANGE= 0.050 WIDTH(Y)= 3.335 RESP(Y)= 0.9312 HSQC= C3
H3B / 1      0.983335 1*1*1  STAT=Y  PRED= 0.932 RANGE= 0.050 WIDTH(Y)= 5.163 RESP(Y)= 0.9292 HSQC= C3
H5A / 1      1.038975 1*1*1  STAT=Y  PRED= 1.015 RANGE= 0.050 WIDTH(Y)= 5.681 RESP(Y)= 0.9664 HSQC= C5
H6A / 1      1.985168 1*1*1  STAT=Y  PRED= 1.700 RANGE= 0.050 WIDTH(Y)= 5.435 RESP(Y)= 0.9192 HSQC= C6
H6B / 1      1.692668 1*1*1  STAT=Y  PRED= 1.737 RANGE= 0.050 WIDTH(Y)= 5.013 RESP(Y)= 0.9360 HSQC= C6
H7A / 1      1.336611 1*1*1  STAT=Y  PRED= 1.360 RANGE= 0.050 WIDTH(Y)= 5.482 RESP(Y)= 0.9031 HSQC= C7
H7B / 1      1.474303 1*1*1  STAT=Y  PRED= 1.449 RANGE= 0.050 WIDTH(Y)= 5.864 RESP(Y)= 0.9915 HSQC= C7
H9A / 1      0.904006 1*1*1  STAT=Y  PRED= 0.921 RANGE= 0.050 WIDTH(Y)= 5.302 RESP(Y)= 0.9761 HSQC= C9
H11A / 1     1.679438 1*1*1  STAT=Y  PRED= 1.651 RANGE= 0.050 WIDTH(Y)= 6.109 RESP(Y)= 0.9509 HSQC= C11
H11B / 1     1.501121 1*1*1  STAT=Y  PRED= 1.429 RANGE= 0.050 WIDTH(Y)= 5.316 RESP(Y)= 0.9007 HSQC= C11
H12A / 1     1.438531 1*1*1  STAT=Y  PRED= 1.348 RANGE= 0.025 WIDTH(Y)= 7.104 RESP(Y)= 1.0000 HSQC= C12
H12B / 1     1.818989 1*1*1  STAT=Y  PRED= 1.599 RANGE= 0.050 WIDTH(Y)= 5.090 RESP(Y)= 0.9451 HSQC= C12
H14A / 1     2.018223 1*1*1  STAT=Y  PRED= 1.869 RANGE= 0.455 WIDTH(Y)= 5.332 RESP(Y)= 0.9685 HSQC= C14
H14B / 1     1.585353 1*1*1  STAT=Y  PRED= 1.192 RANGE= 0.050 WIDTH(Y)= 5.905 RESP(Y)= 0.9764 HSQC= C14
H15A / 1     1.972813 1*1*1  STAT=Y  PRED= 2.023 RANGE= 0.050 WIDTH(Y)= 4.786 RESP(Y)= 0.9421 HSQC= C15
H15B / 1     2.063484 1*1*1  STAT=Y  PRED= 2.052 RANGE= 0.050 WIDTH(Y)= 5.607 RESP(Y)= 0.9264 HSQC= C15
H17A / 1     5.017816 1*1*1  STAT=Y  PRED= 4.878 RANGE= 0.025 WIDTH(Y)= 4.731 RESP(Y)= 0.9638 HSQC= C17
H17B / 1     4.763889 1*1*1  STAT=Y  PRED= 4.687 RANGE= 0.025 WIDTH(Y)= 3.938 RESP(Y)= 0.9720 HSQC= C17
H18B / 1     1.135839 1*1*3  STAT=Y  PRED= 1.101 RANGE= 0.050 WIDTH(Y)= 3.760 RESP(Y)= 0.9314 HSQC= C18
H20B / 1     0.861623 1*1*3  STAT=Y  PRED= 0.866 RANGE= 0.050 WIDTH(Y)= 4.632 RESP(Y)= 0.9416 HSQC= C20
GA1 / 1      5.220881 1*1*1  STAT=Y  PRED= 5.565 RANGE= 0.342 WIDTH(Y)= 2.027 RESP(Y)= 0.9078 HSQC= H21
GA2 / 1      3.134916 1*1*1  STAT=Y  PRED= 3.526 RANGE= 0.200 WIDTH(Y)= 2.023 RESP(Y)= 0.9171 HSQC= C23
GA3 / 1      3.250284 1*1*1  STAT=Y  PRED= 3.317 RANGE= 0.155 WIDTH(Y)= 2.453 RESP(Y)= 0.8548 HSQC= C26
GA4 / 1      3.136546 1*1*1  STAT=Y  PRED= 3.387 RANGE= 0.287 WIDTH(Y)= 2.399 RESP(Y)= 0.8374 HSQC= C27
GA5 / 1      3.179003 1*1*1  STAT=Y  PRED= 3.485 RANGE= 0.247 WIDTH(Y)= 1.930 RESP(Y)= 0.8314 HSQC= C25
GA6A / 1     3.461098 1*1*1  STAT=Y  PRED= 3.351 RANGE= 0.450 WIDTH(Y)= 2.927 RESP(Y)= 0.8318 HSQC= C29
GA6B / 1     3.626158 1*1*1  STAT=Y  PRED= 3.509 RANGE= 0.232 WIDTH(Y)= 3.044 RESP(Y)= 0.8536 HSQC= C29
OGA2 / 1     5.313768 1*1*1  STAT=Y  PRED= 5.633 RANGE= 1.215 WIDTH(Y)= 2.458 RESP(Y)= 0.8978
OGA3 / 1     5.038462 1*1*1  STAT=Y  PRED= 4.296 RANGE= 1.420 WIDTH(Y)= 2.432 RESP(Y)= 0.8798
OGA4 / 1     4.983639 1*1*1  STAT=Y  PRED= 4.702 RANGE= 1.565 WIDTH(Y)= 1.918 RESP(Y)= 0.8679
OGA6 / 1     4.491010 1*1*1  STAT=Y  PRED= 5.633 RANGE= 1.215 WIDTH(Y)= 1.941 RESP(Y)= 0.8978
GB1 / 1      4.456313 1*1*1  STAT=Y  PRED= 5.565 RANGE= 0.342 WIDTH(Y)= 3.359 RESP(Y)= 0.9078 HSQC= H21
GB2 / 1      3.363972 1*1*1  STAT=Y  PRED= 3.526 RANGE= 0.200 WIDTH(Y)= 2.270 RESP(Y)= 0.9171 HSQC= C23
GB3 / 1      3.559321 1*1*1  STAT=Y  PRED= 3.317 RANGE= 0.155 WIDTH(Y)= 2.623 RESP(Y)= 0.8548 HSQC= C26
GB4 / 1      3.199388 1*1*1  STAT=Y  PRED= 3.387 RANGE= 0.287 WIDTH(Y)= 1.959 RESP(Y)= 0.8374 HSQC= C27
GB5 / 1      3.120803 1*1*1  STAT=Y  PRED= 3.485 RANGE= 0.247 WIDTH(Y)= 2.536 RESP(Y)= 0.8314 HSQC= C25
GB6A / 1     3.382959 1*1*1  STAT=Y  PRED= 3.351 RANGE= 0.450 WIDTH(Y)= 2.898 RESP(Y)= 0.8318 HSQC= C29
GB6B / 1     3.655040 1*1*1  STAT=Y  PRED= 3.509 RANGE= 0.232 WIDTH(Y)= 3.083 RESP(Y)= 0.8536 HSQC= C29
OGB4 / 1     4.762887 1*1*1  STAT=Y  PRED= 4.702 RANGE= 1.565 WIDTH(Y)= 3.502 RESP(Y)= 0.8679
OGB6 / 1     4.631116 1*1*1  STAT=Y  PRED= 5.633 RANGE= 1.215 WIDTH(Y)= 2.285 RESP(Y)= 0.8978
RH1 / 1      5.265103 1*1*1  STAT=Y  PRED= 4.453 RANGE= 0.300 WIDTH(Y)= 2.737 RESP(Y)= 0.9527 HSQC= C33
RH2 / 1      3.741521 1*1*1  STAT=Y  PRED= 3.609 RANGE= 0.242 WIDTH(Y)= 3.069 RESP(Y)= 0.9502 HSQC= C38
RH3 / 1      3.427112 1*1*1  STAT=Y  PRED= 3.082 RANGE= 0.582 WIDTH(Y)= 2.583 RESP(Y)= 0.8779 HSQC= C39
RH4 / 1      3.217599 1*1*1  STAT=Y  PRED= 2.968 RANGE= 0.287 WIDTH(Y)= 4.111 RESP(Y)= 0.9349 HSQC= C37
RH5 / 1      3.945094 1*1*1  STAT=Y  PRED= 2.961 RANGE= 0.627 WIDTH(Y)= 2.855 RESP(Y)= 0.9335 HSQC= C36
RH6 / 1      1.067648 1*1*3  STAT=Y  PRED= 0.586 RANGE= 0.262 WIDTH(Y)= 2.846 RESP(Y)= 0.8538 HSQC= C40
ORH2 / 1     4.051573 1*1*1  STAT=Y  PRED= 4.719 RANGE= 1.395 WIDTH(Y)= 2.066 RESP(Y)= 0.7880
ORH3 / 1     4.443468 1*1*1  STAT=Y  PRED= 4.127 RANGE= 1.613 WIDTH(Y)= 1.949 RESP(Y)= 0.8379
ORH4 / 1     4.791816 1*1*1  STAT=Y  PRED= 4.732 RANGE= 1.673 WIDTH(Y)= 2.164 RESP(Y)= 0.8554
GD1 / 1      4.316854 1*1*1  STAT=Y  PRED= 5.565 RANGE= 0.342 WIDTH(Y)= 2.653 RESP(Y)= 0.9078 HSQC= H21
GD2 / 1      3.025455 1*1*1  STAT=Y  PRED= 3.526 RANGE= 0.200 WIDTH(Y)= 2.473 RESP(Y)= 0.9171 HSQC= C23
GD3 / 1      3.168194 1*1*1  STAT=Y  PRED= 3.317 RANGE= 0.155 WIDTH(Y)= 1.997 RESP(Y)= 0.8548 HSQC= C26
GD4 / 1      3.047268 1*1*1  STAT=Y  PRED= 3.387 RANGE= 0.287 WIDTH(Y)= 2.163 RESP(Y)= 0.8374 HSQC= C27
GD5 / 1      3.212035 1*1*1  STAT=Y  PRED= 3.485 RANGE= 0.247 WIDTH(Y)= 3.048 RESP(Y)= 0.8314 HSQC= C25
GD6A / 1     3.404695 1*1*1  STAT=Y  PRED= 3.351 RANGE= 0.450 WIDTH(Y)= 2.958 RESP(Y)= 0.8318 HSQC= C29
GD6B / 1     3.702565 1*1*1  STAT=Y  PRED= 3.509 RANGE= 0.232 WIDTH(Y)= 3.238 RESP(Y)= 0.8536 HSQC= C29
OGD2 / 1     5.165184 1*1*1  STAT=Y  PRED= 5.633 RANGE= 1.215 WIDTH(Y)= 2.047 RESP(Y)= 0.8978
OGD3 / 1     5.159532 1*1*1  STAT=Y  PRED= 4.296 RANGE= 1.420 WIDTH(Y)= 1.906 RESP(Y)= 0.8798
OGD4 / 1     5.038376 1*1*1  STAT=Y  PRED= 4.702 RANGE= 1.565 WIDTH(Y)= 1.614 RESP(Y)= 0.8679
OGD6 / 1     4.658077 1*1*1  STAT=Y  PRED= 5.633 RANGE= 1.215 WIDTH(Y)= 2.113 RESP(Y)= 0.8978
DMSO_CH 2*SPIN= 1 SPECIES=1H      POPULATION(Y)= 0.56433
DMSO / 2      2.500030 1*1*1  STAT=Y  PRED= 2.500 RANGE= 0.050 WIDTH(Y)= 1.568 RESP(Y)= 1.0000
DMSO_D 2*SPIN= 2 SPECIES=2D      POPULATION(Y)= 0.56433
DMSOD1/ 2 -100.000001 1*1*1  STAT=Y  PRED= -99.999 RANGE= 0.050 WIDTH(Y)= 1.500 RESP(Y)= 1.0000
DMSOD2/ 2 -100.000001 1*1*1  STAT=Y  PRED= -99.999 RANGE= 0.050 WIDTH(Y)= 1.500 RESP(Y)= 1.0000
WATER_H 2*SPIN= 1 SPECIES=1H      POPULATION(Y)= 0.36059
WATER / 3      3.349003 2*1*1  STAT=Y  PRED= 3.338 RANGE= 0.050 WIDTH(Y)= 1.588 RESP(Y)= 1.0000
```

```
COUPLING CONSTANTS (HZ) :
J12_13 -12.5950 J H1A H1B STAT=Y PRED= -13.130 RANGE= 1.500
```

|        |          |        |        |        |               |              |
|--------|----------|--------|--------|--------|---------------|--------------|
| J17_12 | 12.8882  | J H1A  | H2A    | STAT=Y | PRED= 12.550  | RANGE= 2.560 |
| J12_18 | 5.0216   | J H1A  | H2B    | STAT=Y | PRED= 4.380   | RANGE= 3.800 |
| J14_12 | -0.0670  | J H1A  | H20B   | STAT=Y | PRED= -0.790  | RANGE= 0.400 |
| J17_13 | 3.0840   | J H1B  | H2A    | STAT=Y | PRED= 3.880   | RANGE= 3.800 |
| J13_18 | 3.7195   | J H1B  | H2B    | STAT=Y | PRED= 2.510   | RANGE= 2.800 |
| J13_19 | 3.3772   | J H1B  | H3A    | STAT=Y | PRED= 2.850   | RANGE= 1.280 |
| J17_18 | -13.3265 | J H2A  | H2B    | STAT=Y | PRED= -13.190 | RANGE= 1.500 |
| J17_19 | 4.1810   | J H2A  | H3A    | STAT=Y | PRED= 3.860   | RANGE= 3.800 |
| J17_20 | 13.6598  | J H2A  | H3B    | STAT=Y | PRED= 12.570  | RANGE= 2.560 |
| J19_18 | 2.1675   | J H2B  | H3A    | STAT=Y | PRED= 2.530   | RANGE= 2.800 |
| J20_18 | 4.8673   | J H2B  | H3B    | STAT=Y | PRED= 4.310   | RANGE= 3.800 |
| J19_20 | -12.9973 | J H3A  | H3B    | STAT=Y | PRED= -13.110 | RANGE= 1.500 |
| J21_22 | 12.4398  | J H5A  | H6A    | STAT=Y | PRED= 12.550  | RANGE= 2.560 |
| J21_23 | 1.0224   | J H5A  | H6B    | STAT=Y | PRED= 1.710   | RANGE= 2.800 |
| J22_23 | -13.6402 | J H6A  | H6B    | STAT=Y | PRED= -13.190 | RANGE= 1.500 |
| J22_24 | 13.1423  | J H6A  | H7A    | STAT=Y | PRED= 12.990  | RANGE= 2.560 |
| J22_25 | 2.9869   | J H6A  | H7B    | STAT=Y | PRED= 3.320   | RANGE= 3.800 |
| J23_24 | 4.4684   | J H6B  | H7A    | STAT=Y | PRED= 3.410   | RANGE= 3.800 |
| J23_25 | 3.4358   | J H6B  | H7B    | STAT=Y | PRED= 3.190   | RANGE= 3.800 |
| J24_25 | -12.3831 | J H7A  | H7B    | STAT=Y | PRED= -13.130 | RANGE= 1.500 |
| J26_1  | 0.0081   | J H9A  | H11A   | STAT=Y | PRED= 0.490   | RANGE= 2.800 |
| J26_2  | 8.1001   | J H9A  | H11B   | STAT=Y | PRED= 9.030   | RANGE= 3.580 |
| J26_6  | 0.1676   | J H9A  | H14B   | STAT=Y | PRED= 2.290   | RANGE= 1.100 |
| J1_2   | -14.4815 | J H11A | H11B   | STAT=Y | PRED= -13.010 | RANGE= 1.500 |
| J3_1   | 1.2577   | J H11A | H12A   | STAT=Y | PRED= 1.040   | RANGE= 2.800 |
| J4_1   | 5.8111   | J H11A | H12B   | STAT=Y | PRED= 6.480   | RANGE= 3.800 |
| J3_2   | 6.4977   | J H11B | H12A   | STAT=Y | PRED= 6.890   | RANGE= 3.800 |
| J4_2   | 12.8127  | J H11B | H12B   | STAT=Y | PRED= 11.180  | RANGE= 2.800 |
| J3_4   | -10.9509 | J H12A | H12B   | STAT=Y | PRED= -12.880 | RANGE= 1.500 |
| J3_6   | 2.3412   | J H12A | H14B   | STAT=Y | PRED= 2.670   | RANGE= 1.280 |
| J5_6   | -11.2862 | J H14A | H14B   | STAT=Y | PRED= -12.450 | RANGE= 2.000 |
| J7_5   | 2.9338   | J H14A | H15A   | STAT=Y | PRED= 1.650   | RANGE= 1.280 |
| J7_8   | -16.7761 | J H15A | H15B   | STAT=Y | PRED= -14.390 | RANGE= 3.000 |
| J7_9   | -2.0671  | J H15A | H17A   | STAT=Y | PRED= -2.030  | RANGE= 1.000 |
| J7_10  | -0.0086  | J H15A | H17B   | STAT=Y | PRED= -1.900  | RANGE= 0.950 |
| J9_8   | -2.5458  | J H15B | H17A   | STAT=Y | PRED= -2.420  | RANGE= 1.200 |
| J10_8  | -0.0067  | J H15B | H17B   | STAT=Y | PRED= -2.140  | RANGE= 1.100 |
| J9_10  | 0.7624   | J H17A | H17B   | STAT=Y | PRED= 2.980   | RANGE= 4.000 |
| J38_40 | 8.2231   | J GA1  | GA2    | STAT=Y | PRED= 7.190   | RANGE= 3.580 |
| J40_43 | 9.0490   | J GA2  | GA3    | STAT=Y | PRED= 8.920   | RANGE= 3.580 |
| J40_48 | 6.4084   | J GA2  | OGA2   | STAT=Y | PRED= 4.300   | RANGE= 1.000 |
| J43_46 | 8.8842   | J GA3  | GA4    | STAT=Y | PRED= 9.140   | RANGE= 3.580 |
| J43_51 | 5.2628   | J GA3  | OGA3   | STAT=Y | PRED= 4.300   | RANGE= 1.000 |
| J41_46 | 10.3655  | J GA4  | GA5    | STAT=Y | PRED= 10.550  | RANGE= 2.560 |
| J46_52 | 5.3953   | J GA4  | OGA4   | STAT=Y | PRED= 4.300   | RANGE= 1.000 |
| J41_49 | 5.1122   | J GA5  | GA6A   | STAT=Y | PRED= 2.700   | RANGE= 3.000 |
| J41_50 | 1.8108   | J GA5  | GA6B   | STAT=Y | PRED= 1.280   | RANGE= 3.000 |
| J49_50 | -11.7635 | J GA6A | GA6B   | STAT=Y | PRED= -12.300 | RANGE= 0.800 |
| J49_51 | 5.8706   | J GA6A | OGA6   | STAT=Y | PRED= 4.300   | RANGE= 3.000 |
| J50_51 | 5.3959   | J GA6B | OGA6   | STAT=Y | PRED= 4.300   | RANGE= 3.000 |
| J48_50 | 7.9075   | J GB1  | GB2    | STAT=Y | PRED= 7.190   | RANGE= 3.580 |
| J50_53 | 9.2013   | J GB2  | GB3    | STAT=Y | PRED= 8.920   | RANGE= 3.580 |
| J53_56 | 8.4433   | J GB3  | GB4    | STAT=Y | PRED= 9.140   | RANGE= 3.580 |
| J51_56 | 9.5249   | J GB4  | GB5    | STAT=Y | PRED= 10.550  | RANGE= 2.560 |
| J56_62 | 5.5294   | J GB4  | OGB4   | STAT=Y | PRED= 4.300   | RANGE= 1.000 |
| J51_59 | 6.0800   | J GB5  | GB6A   | STAT=Y | PRED= 2.700   | RANGE= 3.000 |
| J51_60 | 2.3623   | J GB5  | GB6B   | STAT=Y | PRED= 1.280   | RANGE= 3.000 |
| J59_60 | -11.6465 | J GB6A | GB6B   | STAT=Y | PRED= -12.300 | RANGE= 0.800 |
| J59_61 | 5.9260   | J GB6A | OGB6   | STAT=Y | PRED= 4.300   | RANGE= 3.000 |
| J60_61 | 5.8411   | J GB6B | OGB6   | STAT=Y | PRED= 4.300   | RANGE= 3.000 |
| J56_68 | 1.4424   | J RH1  | RH2    | STAT=Y | PRED= 2.330   | RANGE= 2.800 |
| J68_69 | 3.4424   | J RH2  | RH3    | STAT=Y | PRED= 3.420   | RANGE= 3.800 |
| J68_71 | 3.9662   | J RH2  | ORH2   | STAT=Y | PRED= 4.440   | RANGE= 1.500 |
| J66_69 | 9.3054   | J RH3  | RH4    | STAT=Y | PRED= 9.590   | RANGE= 3.580 |
| J69_72 | 6.7193   | J RH3  | ORH3   | STAT=Y | PRED= 4.300   | RANGE= 1.000 |
| J57_66 | 9.3255   | J RH4  | RH5    | STAT=Y | PRED= 9.940   | RANGE= 3.580 |
| J66_73 | 4.3321   | J RH4  | ORH4   | STAT=Y | PRED= 4.300   | RANGE= 1.000 |
| J57_59 | 6.0389   | J RH5  | RH6    | STAT=Y | PRED= 6.250   | RANGE= 0.600 |
| J68_80 | 7.8401   | J GD1  | GD2    | STAT=Y | PRED= 7.190   | RANGE= 3.580 |
| J70_73 | 8.8413   | J GD2  | GD3    | STAT=Y | PRED= 8.920   | RANGE= 3.580 |
| J70_78 | 4.8805   | J GD2  | OGD2   | STAT=Y | PRED= 4.300   | RANGE= 1.000 |
| J73_76 | 8.6026   | J GD3  | GD4    | STAT=Y | PRED= 9.140   | RANGE= 3.580 |
| J73_81 | 5.2589   | J GD3  | OGD3   | STAT=Y | PRED= 4.300   | RANGE= 1.000 |
| J71_76 | 9.6578   | J GD4  | GD5    | STAT=Y | PRED= 10.550  | RANGE= 2.560 |
| J76_82 | 5.6050   | J GD4  | OGD4   | STAT=Y | PRED= 4.300   | RANGE= 1.000 |
| J71_79 | 6.7829   | J GD5  | GD6A   | STAT=Y | PRED= 2.700   | RANGE= 3.000 |
| J71_80 | 1.8981   | J GD5  | GD6B   | STAT=Y | PRED= 1.280   | RANGE= 3.000 |
| J79_80 | -11.3721 | J GD6A | GD6B   | STAT=Y | PRED= -12.300 | RANGE= 0.800 |
| J79_81 | 5.4333   | J GD6A | OGD6   | STAT=Y | PRED= 4.300   | RANGE= 3.000 |
| J80_81 | 4.9892   | J GD6B | OGD6   | STAT=Y | PRED= 4.300   | RANGE= 3.000 |
| JDMSO1 | 1.7939   | J DMSO | DMSOD1 | STAT=Y | PRED= 1.700   | RANGE= 0.050 |
| JDMSO1 | 1.7939   | J DMSO | DMSOD2 | STAT=Y | PRED= 1.700   | RANGE= 0.050 |

CONTROL PARAMETERS:

Solvent = none (def. 99% enriched)  
1.000 = Concentration (vol%, def=1.0%)  
0.00100000 = Minimum line-intensity

0.00100000 = Diagonalization criterium (not in use)  
600.12701400 = FIELD(1H,MHz), used to transform shifts to ppm  
22.47832099 = Left frequency (ppm)  
-7.49157654 = Right frequency (ppm)  
0.000 = Acquisition time (s, for QMTLS)  
1.500 = Line-width (for modes D, P & T, 0=use defaults)  
0.068609924 = Data-point resolution (Hz)  
63.526 = GAUSSIAN (% , 0=use default from INF)  
-0.819 = Dispersion contribution (% , 0=use default from INF)  
0.00000000 = Decoupling frequency (for DORES)

CONSTRAINTS (in equations X0 = 1.0)...use no empty lines

EQUAL DMSOD1 = DMSOD2  
1.000 \* 1.0 = -41.020 \* 1.0 - 1.000 \* 1.0  
10.000 \* 1.0 = -38.340 \* 1.0 - 1.000 \* 1.0  
11.000 \* 1.0 = -16.670 \* 1.0 - 1.000 \* 1.0  
12.000 \* 1.0 = -36.870 \* 1.0 - 1.000 \* 1.0  
13.000 \* 1.0 = -80.200 \* 1.0 - 1.000 \* 1.0  
14.000 \* 1.0 = -49.010 \* 1.0 - 1.000 \* 1.0  
15.000 \* 1.0 = -48.090 \* 1.0 - 1.000 \* 1.0  
16.0 \* 1.0 = -153.1 \* 1.0 - 1.0 \* 1.0  
17.0 \* 1.0 = -104.2 \* 1.0 - 1.0 \* 1.0  
18.000 \* 1.0 = -28.210 \* 1.0 - 1.000 \* 1.0  
19.0 \* 1.0 = -185.4 \* 1.0 - 1.0 \* 1.0  
2.000 \* 1.0 = -19.040 \* 1.0 - 1.000 \* 1.0  
20.000 \* 1.0 = -14.770 \* 1.0 - 1.000 \* 1.0  
3.000 \* 1.0 = -37.520 \* 1.0 - 1.000 \* 1.0  
4.000 \* 1.0 = -43.240 \* 1.0 - 1.000 \* 1.0  
5.000 \* 1.0 = -55.060 \* 1.0 - 1.000 \* 1.0  
6.000 \* 1.0 = -21.840 \* 1.0 - 1.000 \* 1.0  
7.000 \* 1.0 = -40.820 \* 1.0 - 1.000 \* 1.0  
8.000 \* 1.0 = -42.640 \* 1.0 - 1.000 \* 1.0  
9.000 \* 1.0 = -55.850 \* 1.0 - 1.000 \* 1.0  
IGNORE(HZ): 1246.074 to 1239.040

END of FILE

**S16.** The  $^1\text{H}$  fingerprint of rebaudioside C (**8**) in  $\text{DMSO-}d_6$  (35 mM, 600 MHz, 298 K). The calculated and observed NMR spectra are shown in red and blue, respectively. (\*) denotes unidentified impurities.

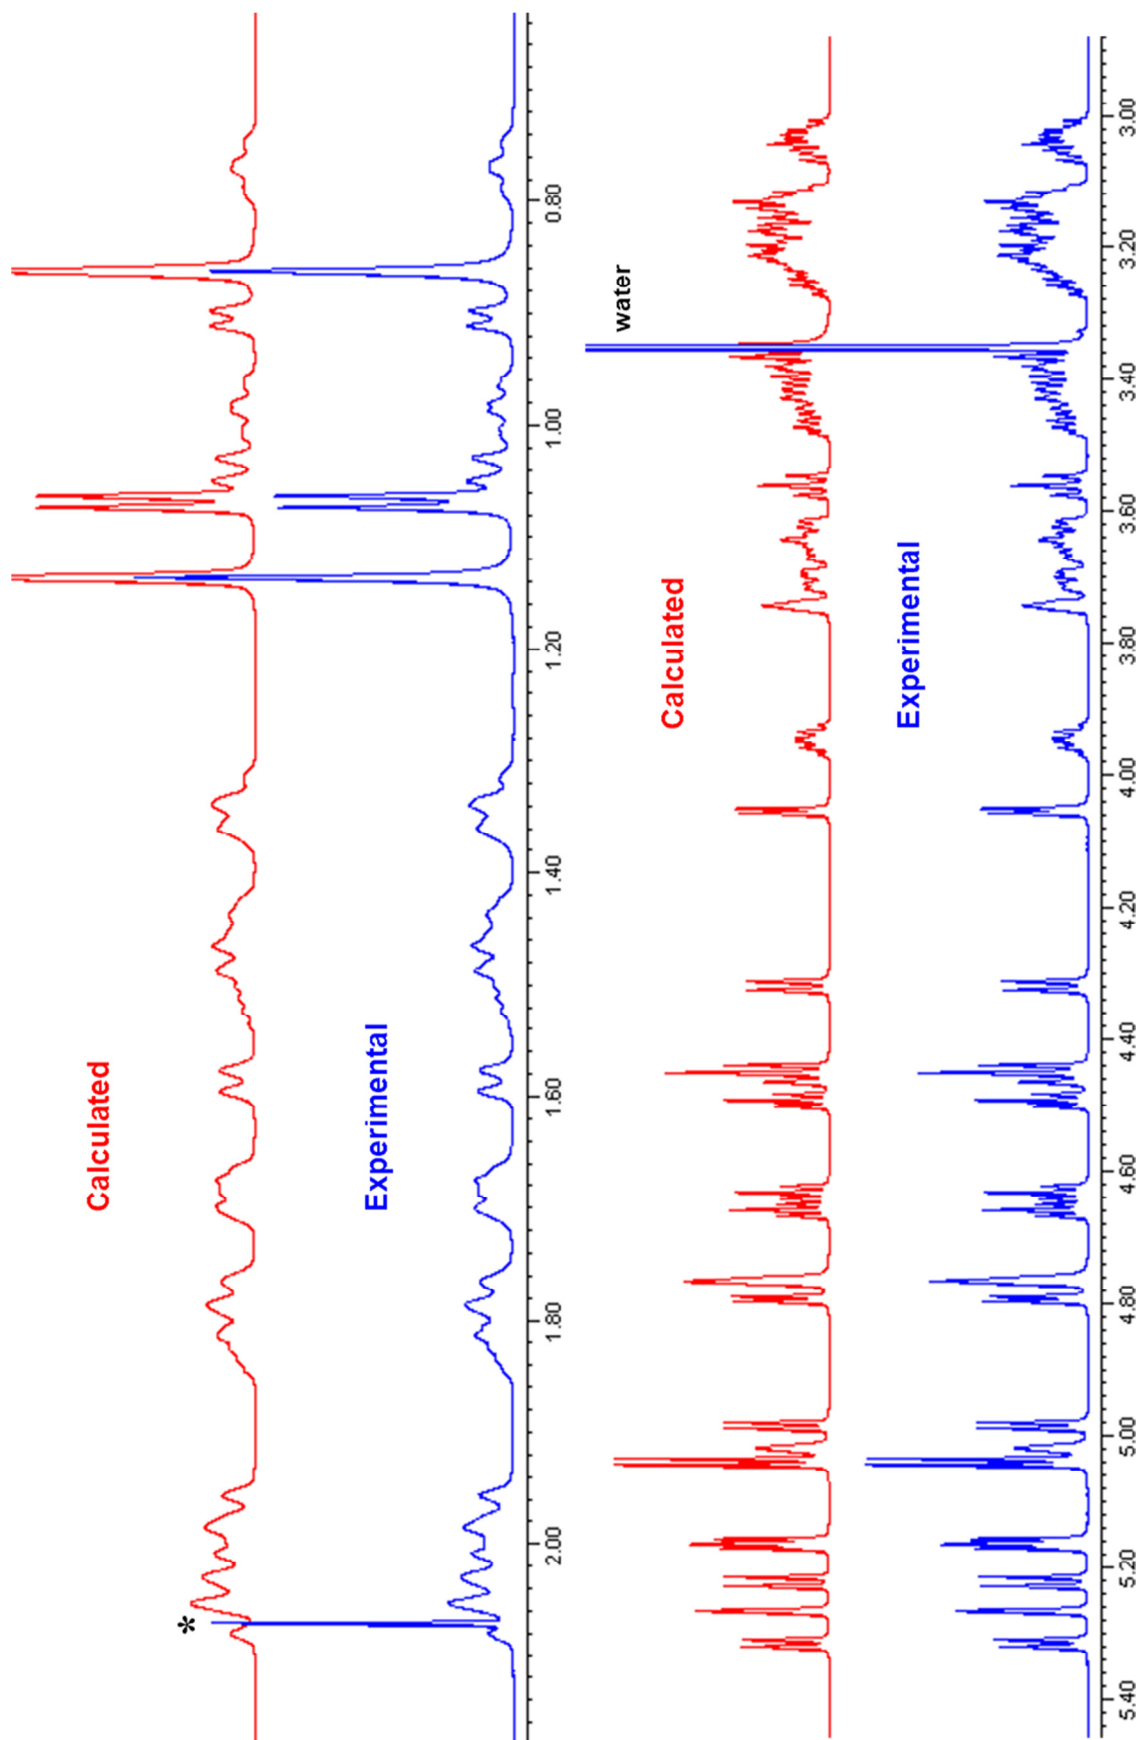

# S17. The HiFSA profile of isosteviol (9) in DMSO-d<sub>6</sub> [in PERCH parameter (.pms) file format].

\* NEW: the lines beginning by \* are comment lines !  
\* To keep all the chemical shifts fixed during iteration  
\* replace "CHEMICAL SHIFTS(HZ):" by "..SHIFTS(HZ): fixed"  
\* The couplings can be fixed in the same way

NMR-data: c:\HIFSA\Stevia\Isosteviol  
#Date 10.10.2014; Time 22:27:54 isosteviol.pms

## CHEMICAL SHIFTS (PPM):

| PROTON  | 2*SPIN= | SPECIES=    | POPULATION(Y)= | STAT=Y | PRED=   | RANGE= | WIDTH(Y)= | RESP(Y)= | HSQC= |
|---------|---------|-------------|----------------|--------|---------|--------|-----------|----------|-------|
| H1A     | / 1     | 0.886279    | 1*1*1          | STAT=Y | 0.779   | 0.050  | 3.428     | 0.9579   | C1    |
| H1B     | / 1     | 1.637285    | 1*1*1          | STAT=Y | 1.778   | 0.050  | 3.898     | 0.9901   | C1    |
| H2A     | / 1     | 1.745874    | 1*1*1          | STAT=Y | 1.764   | 0.050  | 2.405     | 0.9034   | C2    |
| H2B     | / 1     | 1.328132    | 1*1*1          | STAT=Y | 1.332   | 0.050  | 2.338     | 0.9269   | C2    |
| H3A     | / 1     | 2.008950    | 1*1*1          | STAT=Y | 2.000   | 0.050  | 2.294     | 0.9312   | C3    |
| H3B     | / 1     | 0.960618    | 1*1*1          | STAT=Y | 0.932   | 0.050  | 2.475     | 0.9292   | C3    |
| H5A     | / 1     | 1.108461    | 1*1*1          | STAT=Y | 1.015   | 0.050  | 2.570     | 0.9664   | C5    |
| H6A     | / 1     | 1.640488    | 1*1*1          | STAT=Y | 1.700   | 0.050  | 2.292     | 0.9192   | C6    |
| H6B     | / 1     | 1.770152    | 1*1*1          | STAT=Y | 1.737   | 0.050  | 2.849     | 0.9360   | C6    |
| H7A     | / 1     | 1.402968    | 1*1*1          | STAT=Y | 1.360   | 0.050  | 2.195     | 0.9031   | C7    |
| H7B     | / 1     | 1.639577    | 1*1*1          | STAT=Y | 1.449   | 0.050  | 2.697     | 0.9915   | C7    |
| H9A     | / 1     | 1.176851    | 1*1*1          | STAT=Y | 1.062   | 0.405  | 2.610     | 0.9093   | C9    |
| H11A    | / 1     | 1.626487    | 1*1*1          | STAT=Y | 1.337   | 0.422  | 3.526     | 0.9765   | C11   |
| H11B    | / 1     | 1.084846    | 1*1*1          | STAT=Y | 1.019   | 0.280  | 2.489     | 0.8590   | C11   |
| H12A    | / 1     | 1.429645    | 1*1*1          | STAT=Y | 1.622   | 0.472  | 2.235     | 0.8935   | C12   |
| H12B    | / 1     | 1.364991    | 1*1*1          | STAT=Y | 1.115   | 0.227  | 2.343     | 0.8643   | C12   |
| H14A    | / 1     | 1.877328    | 1*1*1          | STAT=Y | 1.966   | 0.482  | 1.991     | 0.9171   | C14   |
| H14B    | / 1     | 2.426231    | 1*1*1          | STAT=Y | 2.250   | 0.355  | 2.053     | 0.8874   | C14   |
| H15A    | / 1     | 1.389487    | 1*1*1          | STAT=Y | 1.238   | 0.245  | 2.125     | 0.8888   | C15   |
| H15B    | / 1     | 1.516894    | 1*1*1          | STAT=Y | 1.337   | 0.320  | 1.979     | 0.9128   | C15   |
| H17C    | / 1     | 0.871010    | 1*1*3          | STAT=Y | 0.937   | 0.157  | 1.591     | 0.8890   | C17   |
| H18B    | / 1     | 1.119657    | 1*1*3          | STAT=Y | 1.101   | 0.050  | 1.853     | 0.9314   | C18   |
| H20B    | / 1     | 0.726281    | 1*1*3          | STAT=Y | 0.866   | 0.050  | 2.174     | 0.9416   | C20   |
| H22A    | / 1     | 11.994823   | 1*1*1          | STAT=Y | 11.981  | 0.050  | 5.637     | 0.7926   |       |
| DMSO_CH | 2       | 2.500041    | 1*1*1          | STAT=Y | 2.500   | 0.050  | 1.341     | 1.0000   |       |
| DMSO_D  | 2       | 2.500041    | 1*1*1          | STAT=Y | 2.500   | 0.050  | 1.341     | 1.0000   |       |
| DMSOD1  | 2       | -100.000001 | 1*1*1          | STAT=Y | -99.999 | 0.050  | 1.500     | 1.0000   |       |
| DMSOD2  | 2       | -100.000001 | 1*1*1          | STAT=Y | -99.999 | 0.050  | 1.500     | 1.0000   |       |
| WATER_H | 2       | 3.337302    | 2*1*1          | STAT=Y | 3.338   | 0.050  | 2.342     | 1.0000   |       |
| WATER   | 3       | 3.337302    | 2*1*1          | STAT=Y | 3.338   | 0.050  | 2.342     | 1.0000   |       |

## COUPLING CONSTANTS (HZ):

| J      | STAT=Y | PRED=   | RANGE= |
|--------|--------|---------|--------|
| J12_13 | STAT=Y | -13.130 | 1.500  |
| J17_12 | STAT=Y | 12.550  | 2.560  |
| J12_18 | STAT=Y | 4.380   | 3.800  |
| J14_12 | STAT=Y | -0.790  | 0.400  |
| J17_13 | STAT=Y | 3.880   | 3.800  |
| J13_18 | STAT=Y | 2.510   | 2.800  |
| J13_19 | STAT=Y | 2.850   | 1.280  |
| J17_18 | STAT=Y | -13.190 | 1.500  |
| J17_19 | STAT=Y | 3.860   | 3.800  |
| J17_20 | STAT=Y | 12.570  | 2.560  |
| J19_18 | STAT=Y | 2.530   | 2.800  |
| J20_18 | STAT=Y | 4.310   | 3.800  |
| J19_20 | STAT=Y | -13.110 | 1.500  |
| J21_22 | STAT=Y | 12.550  | 2.560  |
| J21_23 | STAT=Y | 1.710   | 2.800  |
| J22_23 | STAT=Y | -13.190 | 1.500  |
| J22_24 | STAT=Y | 12.990  | 2.560  |
| J22_25 | STAT=Y | 3.320   | 3.800  |
| J23_24 | STAT=Y | 3.410   | 3.800  |
| J23_25 | STAT=Y | 3.190   | 3.800  |
| J24_25 | STAT=Y | -13.130 | 1.500  |
| J16_18 | STAT=Y | 4.170   | 3.800  |
| J16_19 | STAT=Y | 12.400  | 2.560  |
| J16_26 | STAT=Y | 1.810   | 0.890  |
| J18_19 | STAT=Y | -13.160 | 1.500  |
| J18_31 | STAT=Y | 1.150   | 3.000  |
| J18_22 | STAT=Y | 6.170   | 3.800  |
| J19_31 | STAT=Y | 6.320   | 3.800  |
| J19_22 | STAT=Y | 11.380  | 2.800  |
| J31_22 | STAT=Y | -13.200 | 1.500  |
| J31_39 | STAT=Y | 2.750   | 1.280  |
| J26_27 | STAT=Y | -15.930 | 4.000  |
| J27_38 | STAT=Y | 1.480   | 1.200  |
| J38_39 | STAT=Y | -12.660 | 2.000  |
| JDMSO1 | STAT=Y | 1.700   | 0.050  |
| JDMSO1 | STAT=Y | 1.700   | 0.050  |

## CONTROL PARAMETERS:

Solvent = none (def. 99% enriched)  
1.000 = Concentration (vol%, def=1.0%)  
0.00100000 = Minimum line-intensity



```
0.00100000 = Diagonalization criterium (not in use)
600.13153100 = FIELD(1H,MHz), used to transform shifts to ppms
13.31091501 = Left frequency (ppm)
-1.00377999 = Right frequency (ppm)
10.000 = Acquisition time (s, for QMTLS)
0.000 = Line-width (for modes D, P & T, 0=use defaults)
0.068609932 = Data-point resolution (Hz)
63.251 = GAUSSIAN (% , 0=use default from INF)
5.347 = Dispersion contribution (% , 0=use default from INF)
0.00000000 = Decoupling frequency (for DORES)

CONSTRAINTS (in equations X0 = 1.0)...use no empty lines
EQUAL H11A = H15B
EQUAL DMSOD1 = DMSOD2
IGNORE(HZ): 1573.488 to 1560.842
IGNORE(HZ): 1436.106 to 1424.075
IGNORE(HZ): 1995.481 to 1978.842
IGNORE(HZ): 2448.136 to 2397.794

END of FILE
```

**S18.** The  $^1\text{H}$  fingerprint of isosteviol (**9**) in  $\text{DMSO-}d_6$  (37 mM, 600 MHz, 298 K). The calculated and observed NMR spectra are shown in red and blue, respectively. (\*) denotes unidentified impurities.

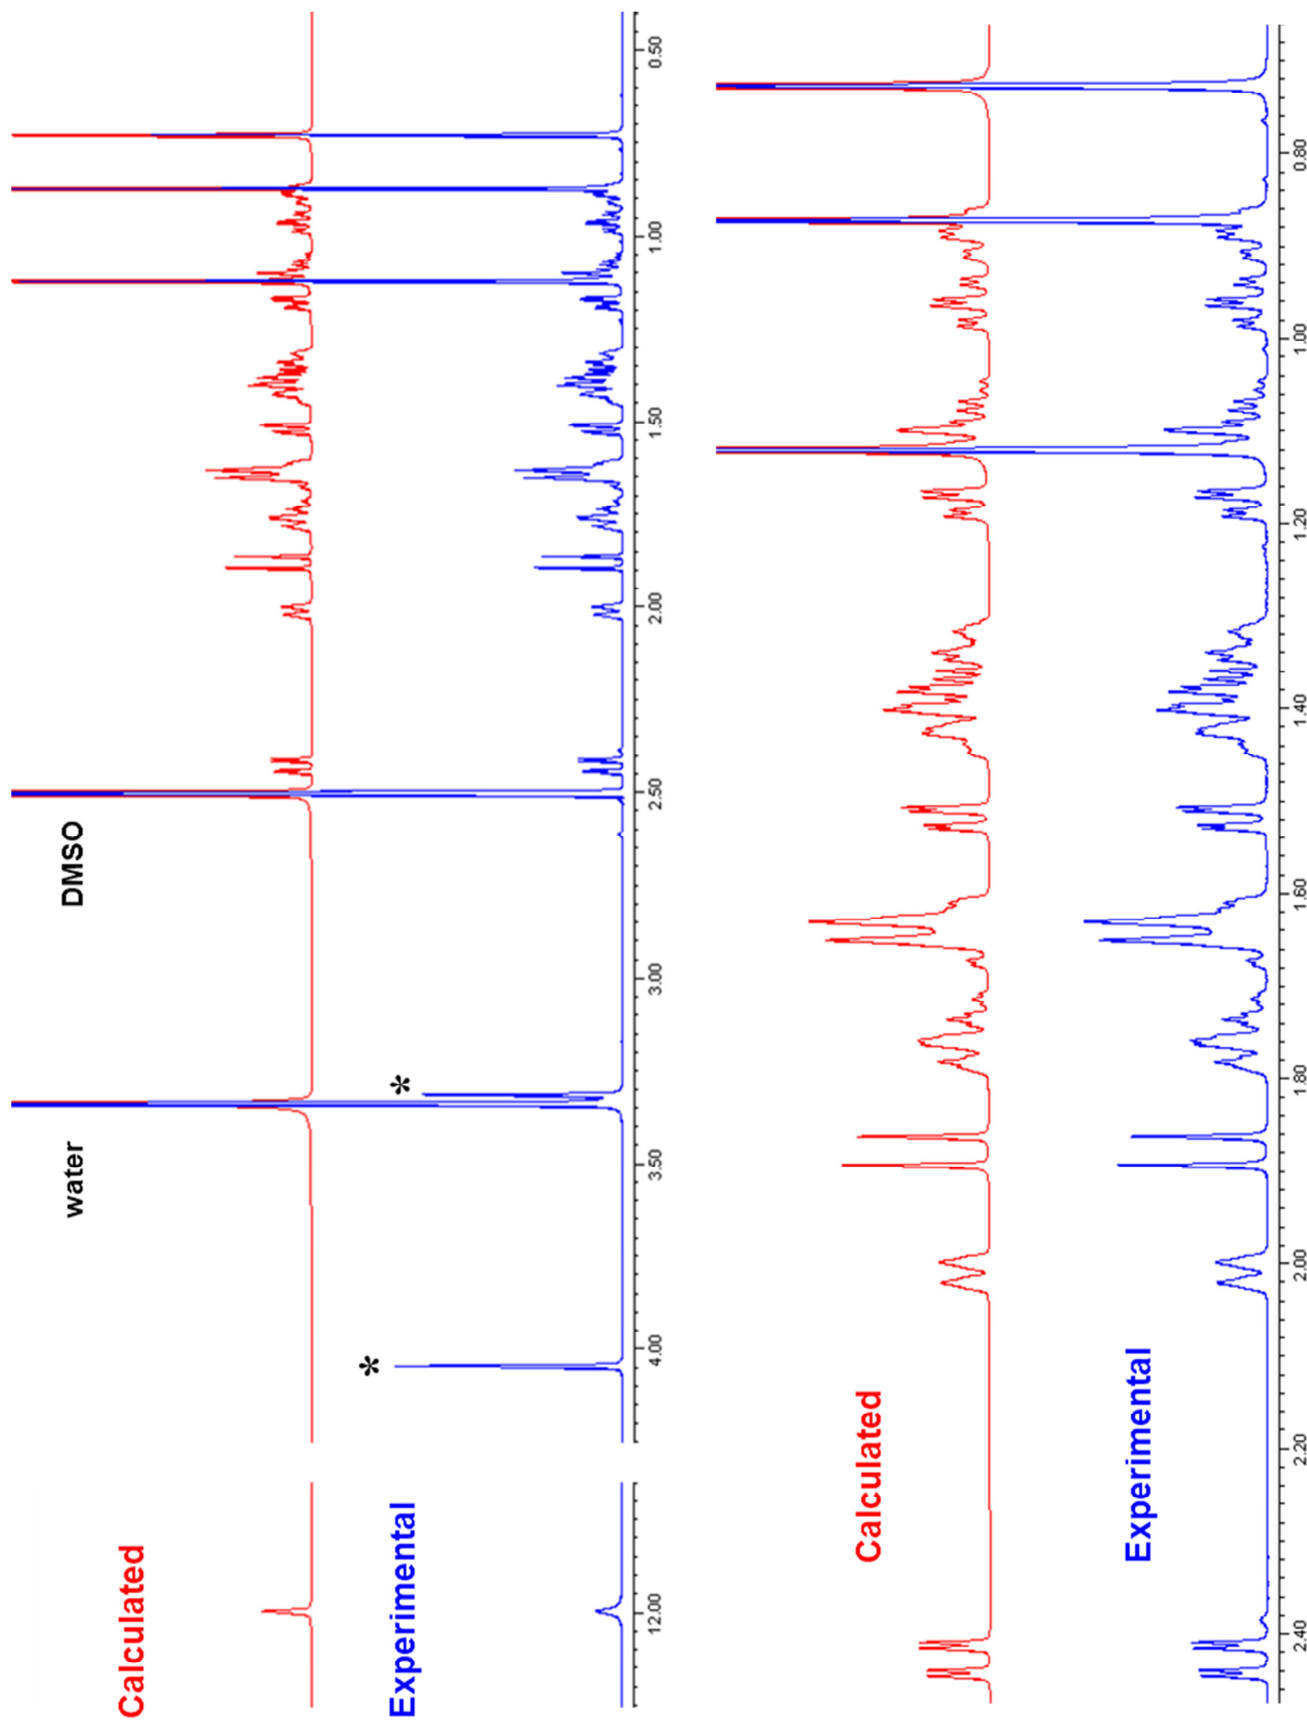

# S19. The HiFSA profile of isosteviol monoside (10) in DMSO-*d*<sub>6</sub> [in PERCH parameter (.pms) file format].

\* NEW: the lines beginning by \* are comment lines !  
 \* To keep all the chemical shifts fixed during iteration  
 \* replace "CHEMICAL SHIFTS(HZ):" by "..SHIFTS(HZ): fixed"  
 \* The couplings can be fixed in the same way

NMR-data: c:\HIFSA\Stevia\Isosteviol\_monoside  
 #Date 10.10.2014; Time 22:29:40 isomono.pms

## CHEMICAL SHIFTS (PPM) :

| PROTON  | 2*SPIN= | SPECIES=          | POPULATION(Y)= | 0.03511                                                            |
|---------|---------|-------------------|----------------|--------------------------------------------------------------------|
| H1A     | / 1     | 0.880956 1*1*1    | STAT=Y         | PRED= 0.779 RANGE= 0.050 WIDTH(Y)= 3.950 RESP(Y)= 0.9579 HSQC= C1  |
| H1B     | / 1     | 1.620338 1*1*1    | STAT=Y         | PRED= 1.778 RANGE= 0.050 WIDTH(Y)= 3.923 RESP(Y)= 0.9901 HSQC= C1  |
| H2A     | / 1     | 1.740285 1*1*1    | STAT=Y         | PRED= 1.764 RANGE= 0.050 WIDTH(Y)= 2.763 RESP(Y)= 0.9034 HSQC= C2  |
| H2B     | / 1     | 1.344453 1*1*1    | STAT=Y         | PRED= 1.332 RANGE= 0.050 WIDTH(Y)= 2.565 RESP(Y)= 0.9269 HSQC= C2  |
| H3A     | / 1     | 2.064758 1*1*1    | STAT=Y         | PRED= 2.000 RANGE= 0.050 WIDTH(Y)= 2.859 RESP(Y)= 0.9312 HSQC= C3  |
| H3B     | / 1     | 1.016195 1*1*1    | STAT=Y         | PRED= 0.932 RANGE= 0.050 WIDTH(Y)= 2.976 RESP(Y)= 0.9292 HSQC= C3  |
| H5A     | / 1     | 1.155233 1*1*1    | STAT=Y         | PRED= 1.015 RANGE= 0.050 WIDTH(Y)= 3.983 RESP(Y)= 0.9664 HSQC= C5  |
| H6A     | / 1     | 1.847084 1*1*1    | STAT=Y         | PRED= 1.700 RANGE= 0.050 WIDTH(Y)= 3.137 RESP(Y)= 0.9192 HSQC= C6  |
| H6B     | / 1     | 1.740230 1*1*1    | STAT=Y         | PRED= 1.737 RANGE= 0.050 WIDTH(Y)= 3.030 RESP(Y)= 0.9360 HSQC= C6  |
| H7A     | / 1     | 1.391935 1*1*1    | STAT=Y         | PRED= 1.360 RANGE= 0.050 WIDTH(Y)= 3.131 RESP(Y)= 0.9031 HSQC= C7  |
| H7B     | / 1     | 1.614156 1*1*1    | STAT=Y         | PRED= 1.449 RANGE= 0.050 WIDTH(Y)= 3.525 RESP(Y)= 0.9915 HSQC= C7  |
| H9A     | / 1     | 1.160477 1*1*1    | STAT=Y         | PRED= 1.062 RANGE= 0.405 WIDTH(Y)= 2.638 RESP(Y)= 0.9093 HSQC= C9  |
| H11A    | / 1     | 1.608357 1*1*1    | STAT=Y         | PRED= 1.337 RANGE= 0.422 WIDTH(Y)= 3.519 RESP(Y)= 0.9765 HSQC= C11 |
| H11B    | / 1     | 1.073988 1*1*1    | STAT=Y         | PRED= 1.019 RANGE= 0.280 WIDTH(Y)= 3.035 RESP(Y)= 0.8590 HSQC= C11 |
| H12A    | / 1     | 1.427082 1*1*1    | STAT=Y         | PRED= 1.622 RANGE= 0.472 WIDTH(Y)= 2.757 RESP(Y)= 0.8935 HSQC= C12 |
| H12B    | / 1     | 1.358586 1*1*1    | STAT=Y         | PRED= 1.115 RANGE= 0.227 WIDTH(Y)= 3.136 RESP(Y)= 0.8643 HSQC= C12 |
| H14A    | / 1     | 1.840642 1*1*1    | STAT=Y         | PRED= 1.966 RANGE= 0.482 WIDTH(Y)= 2.509 RESP(Y)= 0.9171 HSQC= C14 |
| H14B    | / 1     | 2.464578 1*1*1    | STAT=Y         | PRED= 2.250 RANGE= 0.355 WIDTH(Y)= 2.513 RESP(Y)= 0.8874 HSQC= C14 |
| H15A    | / 1     | 1.379578 1*1*1    | STAT=Y         | PRED= 1.238 RANGE= 0.245 WIDTH(Y)= 2.710 RESP(Y)= 0.8888 HSQC= C15 |
| H15B    | / 1     | 1.514066 1*1*1    | STAT=Y         | PRED= 1.337 RANGE= 0.320 WIDTH(Y)= 2.496 RESP(Y)= 0.9128 HSQC= C15 |
| H17C    | / 1     | 0.869964 1*1*3    | STAT=Y         | PRED= 0.937 RANGE= 0.157 WIDTH(Y)= 1.910 RESP(Y)= 0.8890 HSQC= C17 |
| H18B    | / 1     | 1.153692 1*1*3    | STAT=Y         | PRED= 1.101 RANGE= 0.050 WIDTH(Y)= 2.224 RESP(Y)= 0.9314 HSQC= C18 |
| H20B    | / 1     | 0.711312 1*1*3    | STAT=Y         | PRED= 0.866 RANGE= 0.050 WIDTH(Y)= 2.724 RESP(Y)= 0.9416 HSQC= C20 |
| GA1     | / 1     | 5.273875 1*1*1    | STAT=Y         | PRED= 5.565 RANGE= 0.342 WIDTH(Y)= 1.357 RESP(Y)= 0.9078 HSQC= H21 |
| GA2     | / 1     | 3.125355 1*1*1    | STAT=Y         | PRED= 3.526 RANGE= 0.200 WIDTH(Y)= 1.551 RESP(Y)= 0.9171 HSQC= C23 |
| GA3     | / 1     | 3.218541 1*1*1    | STAT=Y         | PRED= 3.317 RANGE= 0.155 WIDTH(Y)= 1.544 RESP(Y)= 0.8548 HSQC= C26 |
| GA4     | / 1     | 3.116650 1*1*1    | STAT=Y         | PRED= 3.387 RANGE= 0.287 WIDTH(Y)= 1.592 RESP(Y)= 0.8374 HSQC= C27 |
| GA5     | / 1     | 3.163869 1*1*1    | STAT=Y         | PRED= 3.485 RANGE= 0.247 WIDTH(Y)= 1.653 RESP(Y)= 0.8314 HSQC= C25 |
| GA6A    | / 1     | 3.447025 1*1*1    | STAT=Y         | PRED= 3.351 RANGE= 0.450 WIDTH(Y)= 1.867 RESP(Y)= 0.8318 HSQC= C29 |
| GA6B    | / 1     | 3.621034 1*1*1    | STAT=Y         | PRED= 3.509 RANGE= 0.232 WIDTH(Y)= 1.807 RESP(Y)= 0.8536 HSQC= C29 |
| OGA2    | / 1     | 5.219173 1*1*1    | STAT=Y         | PRED= 5.633 RANGE= 1.215 WIDTH(Y)= 1.424 RESP(Y)= 0.8978           |
| OGA3    | / 1     | 5.054141 1*1*1    | STAT=Y         | PRED= 4.296 RANGE= 1.420 WIDTH(Y)= 1.396 RESP(Y)= 0.8798           |
| OGA4    | / 1     | 4.968791 1*1*1    | STAT=Y         | PRED= 4.702 RANGE= 1.565 WIDTH(Y)= 1.367 RESP(Y)= 0.8679           |
| OGA6    | / 1     | 4.459874 1*1*1    | STAT=Y         | PRED= 5.633 RANGE= 1.215 WIDTH(Y)= 1.557 RESP(Y)= 0.8978           |
| DMSO_CH | 2*SPIN= | 1 SPECIES=1H      | POPULATION(Y)= | 0.88049                                                            |
| DMSO    | / 2     | 2.500009 1*1*1    | STAT=Y         | PRED= 2.500 RANGE= 0.050 WIDTH(Y)= 1.389 RESP(Y)= 1.0000           |
| DMSO_D  | 2*SPIN= | 2 SPECIES=2D      | POPULATION(Y)= | 0.88049                                                            |
| DMSOD1  | / 2     | -100.000001 1*1*1 | STAT=Y         | PRED= -99.999 RANGE= 0.050 WIDTH(Y)= 1.500 RESP(Y)= 1.0000         |
| DMSOD2  | / 2     | -100.000001 1*1*1 | STAT=Y         | PRED= -99.999 RANGE= 0.050 WIDTH(Y)= 1.500 RESP(Y)= 1.0000         |
| WATER_H | 2*SPIN= | 1 SPECIES=1H      | POPULATION(Y)= | 0.08440                                                            |
| WATER   | / 3     | 3.328898 2*1*1    | STAT=Y         | PRED= 3.338 RANGE= 0.050 WIDTH(Y)= 1.235 RESP(Y)= 1.0000           |

## COUPLING CONSTANTS (HZ) :

|        |          |        |      |        |                            |
|--------|----------|--------|------|--------|----------------------------|
| J12_13 | -11.6508 | J H1A  | H1B  | STAT=Y | PRED= -13.130 RANGE= 1.500 |
| J17_12 | 13.3895  | J H1A  | H2A  | STAT=Y | PRED= 12.550 RANGE= 2.560  |
| J12_18 | 5.3514   | J H1A  | H2B  | STAT=Y | PRED= 4.380 RANGE= 3.800   |
| J14_12 | -0.0010  | J H1A  | H20B | STAT=Y | PRED= -0.790 RANGE= 0.400  |
| J17_13 | 3.0715   | J H1B  | H2A  | STAT=Y | PRED= 3.880 RANGE= 3.800   |
| J13_18 | 2.3732   | J H1B  | H2B  | STAT=Y | PRED= 2.510 RANGE= 2.800   |
| J13_19 | 1.4964   | J H1B  | H3A  | STAT=Y | PRED= 2.850 RANGE= 1.280   |
| J17_18 | -13.4937 | J H2A  | H2B  | STAT=Y | PRED= -13.190 RANGE= 1.500 |
| J17_19 | 3.0566   | J H2A  | H3A  | STAT=Y | PRED= 3.860 RANGE= 3.800   |
| J17_20 | 13.7842  | J H2A  | H3B  | STAT=Y | PRED= 12.570 RANGE= 2.560  |
| J19_18 | 3.4087   | J H2B  | H3A  | STAT=Y | PRED= 2.530 RANGE= 2.800   |
| J20_18 | 4.1910   | J H2B  | H3B  | STAT=Y | PRED= 4.310 RANGE= 3.800   |
| J19_20 | -13.0143 | J H3A  | H3B  | STAT=Y | PRED= -13.110 RANGE= 1.500 |
| J21_22 | 12.9949  | J H5A  | H6A  | STAT=Y | PRED= 12.550 RANGE= 2.560  |
| J21_23 | 5.6510   | J H5A  | H6B  | STAT=Y | PRED= 1.710 RANGE= 2.800   |
| J22_23 | -14.5233 | J H6A  | H6B  | STAT=Y | PRED= -13.190 RANGE= 1.500 |
| J22_24 | 13.5977  | J H6A  | H7A  | STAT=Y | PRED= 12.990 RANGE= 2.560  |
| J22_25 | 3.3910   | J H6A  | H7B  | STAT=Y | PRED= 3.320 RANGE= 3.800   |
| J23_24 | 3.7642   | J H6B  | H7A  | STAT=Y | PRED= 3.410 RANGE= 3.800   |
| J23_25 | 1.8332   | J H6B  | H7B  | STAT=Y | PRED= 3.190 RANGE= 3.800   |
| J24_25 | -13.2179 | J H7A  | H7B  | STAT=Y | PRED= -13.130 RANGE= 1.500 |
| J16_18 | 9.5578   | J H9A  | H11A | STAT=Y | PRED= 4.170 RANGE= 3.800   |
| J16_19 | 12.2000  | J H9A  | H11B | STAT=Y | PRED= 12.400 RANGE= 2.560  |
| J16_26 | 0.0411   | J H9A  | H14A | STAT=Y | PRED= 1.810 RANGE= 0.890   |
| J18_19 | -14.5862 | J H11A | H11B | STAT=Y | PRED= -13.160 RANGE= 1.500 |
| J18_31 | 2.7467   | J H11A | H12A | STAT=Y | PRED= 1.150 RANGE= 3.000   |
| J18_22 | 5.2313   | J H11A | H12B | STAT=Y | PRED= 6.170 RANGE= 3.800   |
| J19_31 | 5.5443   | J H11B | H12A | STAT=Y | PRED= 6.320 RANGE= 3.800   |
| J19_22 | 13.4248  | J H11B | H12B | STAT=Y | PRED= 11.380 RANGE= 2.800  |
| J31_22 | -12.4433 | J H12A | H12B | STAT=Y | PRED= -13.200 RANGE= 1.500 |
| J31_39 | 2.6956   | J H12A | H15B | STAT=Y | PRED= 2.750 RANGE= 1.280   |

|        |          |        |        |        |       |         |        |       |
|--------|----------|--------|--------|--------|-------|---------|--------|-------|
| J26_27 | -18.6305 | J H14A | H14B   | STAT=Y | PRED= | -15.930 | RANGE= | 4.000 |
| J27_38 | 3.5756   | J H14B | H15A   | STAT=Y | PRED= | 1.480   | RANGE= | 1.200 |
| J38_39 | -11.3693 | J H15A | H15B   | STAT=Y | PRED= | -12.660 | RANGE= | 2.000 |
| J38_40 | 8.2488   | J GA1  | GA2    | STAT=Y | PRED= | 7.190   | RANGE= | 3.580 |
| J40_43 | 9.1213   | J GA2  | GA3    | STAT=Y | PRED= | 8.920   | RANGE= | 3.580 |
| J40_48 | 6.3397   | J GA2  | OGA2   | STAT=Y | PRED= | 4.300   | RANGE= | 1.000 |
| J43_46 | 8.8402   | J GA3  | GA4    | STAT=Y | PRED= | 9.140   | RANGE= | 3.580 |
| J43_51 | 5.2551   | J GA3  | OGA3   | STAT=Y | PRED= | 4.300   | RANGE= | 1.000 |
| J41_46 | 9.7543   | J GA4  | GA5    | STAT=Y | PRED= | 10.550  | RANGE= | 2.560 |
| J46_52 | 5.5548   | J GA4  | OGA4   | STAT=Y | PRED= | 4.300   | RANGE= | 1.000 |
| J41_49 | 5.2613   | J GA5  | GA6A   | STAT=Y | PRED= | 2.700   | RANGE= | 3.000 |
| J41_50 | 2.0894   | J GA5  | GA6B   | STAT=Y | PRED= | 1.280   | RANGE= | 3.000 |
| J49_50 | -11.8575 | J GA6A | GA6B   | STAT=Y | PRED= | -12.300 | RANGE= | 0.800 |
| J49_51 | 5.9364   | J GA6A | OGA6   | STAT=Y | PRED= | 4.300   | RANGE= | 3.000 |
| J50_51 | 5.2968   | J GA6B | OGA6   | STAT=Y | PRED= | 4.300   | RANGE= | 3.000 |
| JDMSO1 | 1.7939   | J DMSO | DMSOD1 | STAT=Y | PRED= | 1.700   | RANGE= | 0.050 |
| JDMSO1 | 1.7939   | J DMSO | DMSOD2 | STAT=Y | PRED= | 1.700   | RANGE= | 0.050 |

CONTROL PARAMETERS:

Solvent = none (def. 99% enriched)  
 1.000 = Concentration (vol%, def=1.0%)  
 0.00100000 = Minimum line-intensity  
 0.00100000 = Diagonalization criterium (not in use)  
 600.12701400 = FIELD(1H,MHz), used to transform shifts to ppms  
 13.31091512 = Left frequency (ppm)  
 -1.00378002 = Right frequency (ppm)  
 0.000 = Acquisition time (s, for QMTLS)  
 1.235 = Line-width (for modes D, P & T, 0=use defaults)  
 0.068609924 = Data-point resolution (Hz)  
 66.182 = GAUSSIAN (% , 0=use default from INF)  
 1.092 = Dispersion contribution (% , 0=use default from INF)  
 0.00000000 = Decoupling frequency (for DORES)

CONSTRAINTS (in equations X0 = 1.0)...use no empty lines

EQUAL H11A = H15B  
 EQUAL DMSOD1 = DMSOD2  
 IGNORE(HZ): 1573.488 to 1560.842  
 IGNORE(HZ): 1436.106 to 1424.075  
 IGNORE(HZ): 2032.754 to 2025.968  
 IGNORE(HZ): 389.543 to 355.134

END of FILE

**S20.** The  $^1\text{H}$  fingerprint of isosteviol monoside (**10**) in  $\text{DMSO-}d_6$  (8.3 mM, 600 MHz, 298 K). The calculated and observed NMR spectra are shown in red and blue, respectively. (\*) denotes unidentified impurities.

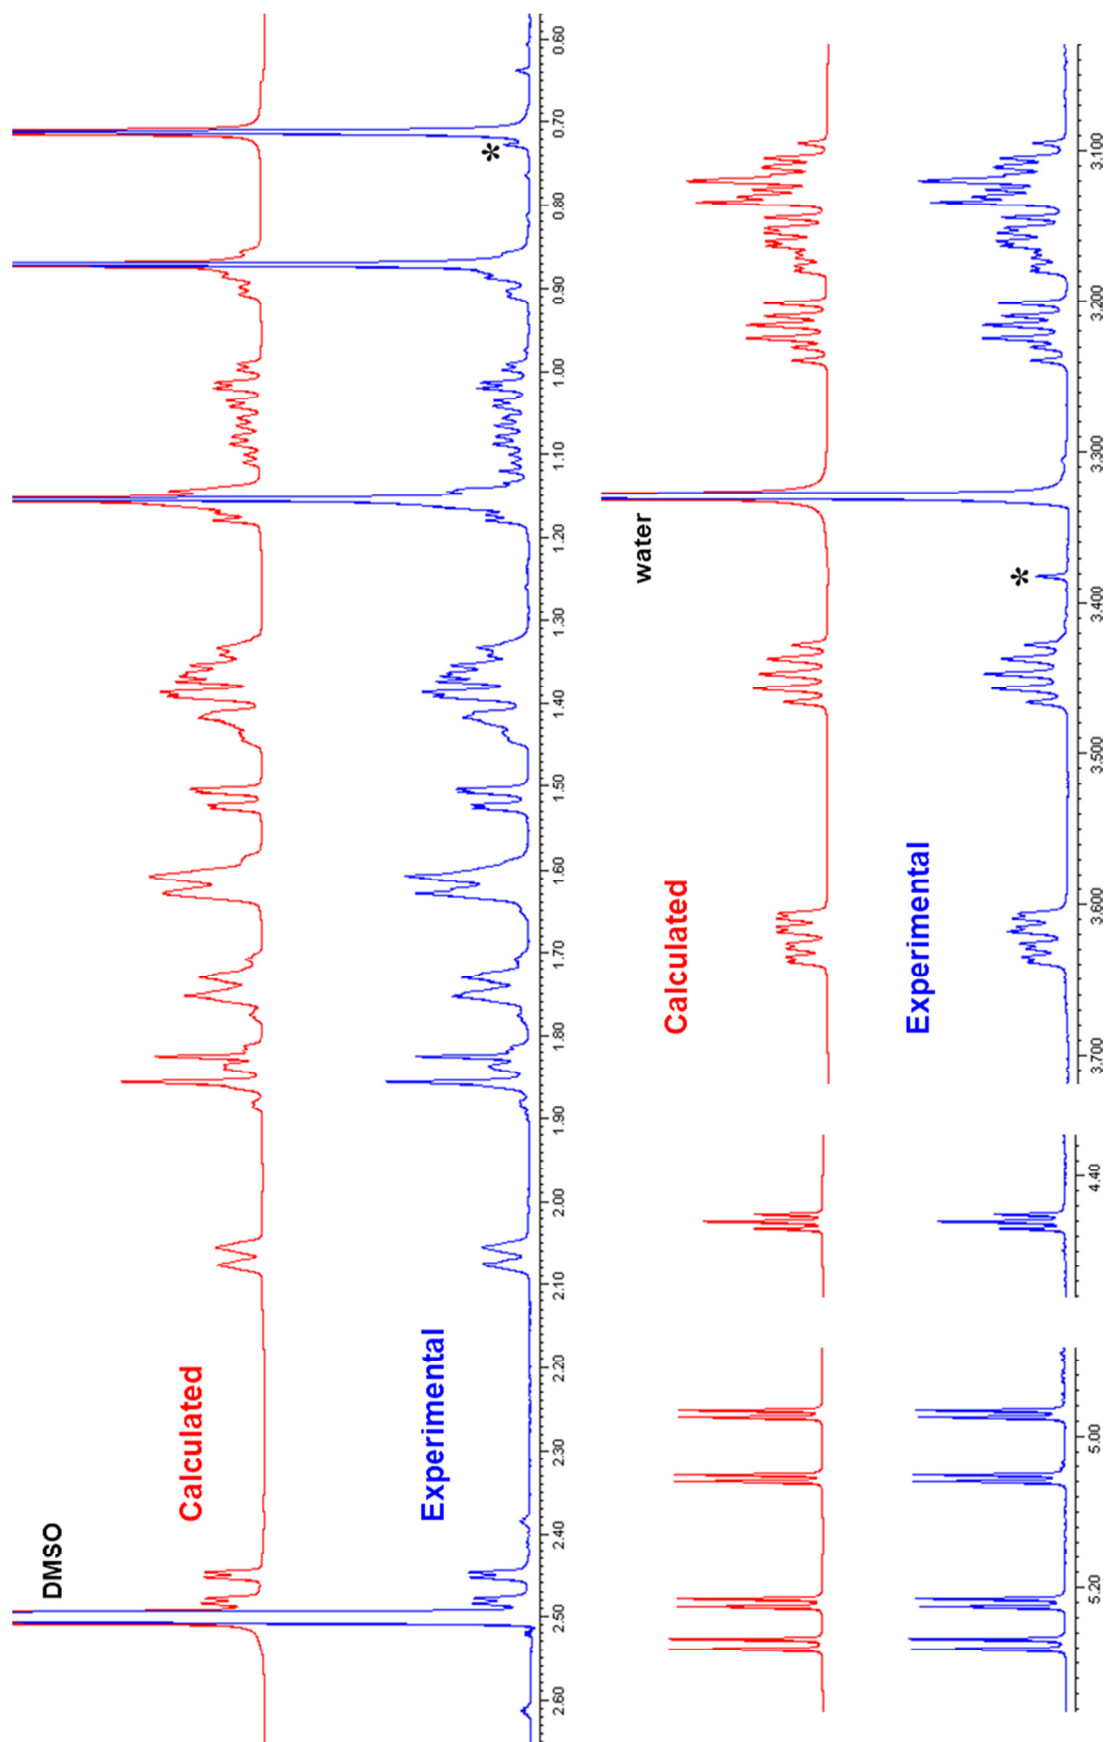

## S21. The HiFSA profile of erythritol (12) in DMSO-*d*<sub>6</sub> [in PERCH parameter (.pms) file format].

\* NEW: the lines beginning by \* are comment lines !  
\* To keep all the chemical shifts fixed during iteration  
\* replace "CHEMICAL SHIFTS(HZ):" by "..SHIFTS(HZ): fixed"  
\* The couplings can be fixed in the same way

NMR-data: c:\HIFSA\Stevia\Erythritol  
#Date 10.10.2014; Time 22:30:49 erythritol.pms

### CHEMICAL SHIFTS (PPM):

| PROTON      | 2*SPIN=     | SPECIES= | 1H     | POPULATION(Y)= | 0.25056      |                 |                 |             |
|-------------|-------------|----------|--------|----------------|--------------|-----------------|-----------------|-------------|
| H1_4A / 1   | 3.530912    | 1*2*1    | STAT=Y | PRED= 3.408    | RANGE= 0.150 | WIDTH(Y)= 1.529 | RESP(Y)= 0.8448 | HSQC= C1_4B |
| H1_4C / 1   | 3.347650    | 1*2*1    | STAT=Y | PRED= 3.445    | RANGE= 0.150 | WIDTH(Y)= 1.556 | RESP(Y)= 0.8652 | HSQC= C1_4B |
| H2_3B / 1   | 3.335999    | 1*2*1    | STAT=Y | PRED= 3.441    | RANGE= 0.150 | WIDTH(Y)= 1.242 | RESP(Y)= 1.0000 | HSQC= C2_3B |
| H5_6B / 1   | 4.324491    | 1*2*1    | STAT=Y | PRED= 4.386    | RANGE= 1.340 | WIDTH(Y)= 1.513 | RESP(Y)= 0.8604 |             |
| H7_8B / 1   | 4.456002    | 1*2*1    | STAT=Y | PRED= 4.348    | RANGE= 0.905 | WIDTH(Y)= 1.416 | RESP(Y)= 0.8374 |             |
| DMSO_CH / 2 | 2.500182    | 1*1*1    | STAT=Y | PRED= 2.500    | RANGE= 0.050 | WIDTH(Y)= 1.626 | RESP(Y)= 1.0000 |             |
| DMSO_D / 2  | 2.500182    | 1*1*1    | STAT=Y | PRED= 2.500    | RANGE= 0.050 | WIDTH(Y)= 1.626 | RESP(Y)= 1.0000 |             |
| DMSOD1 / 2  | -100.000001 | 1*1*1    | STAT=Y | PRED= -99.999  | RANGE= 0.050 | WIDTH(Y)= 1.500 | RESP(Y)= 1.0000 |             |
| DMSOD2 / 2  | -100.000001 | 1*1*1    | STAT=Y | PRED= -99.999  | RANGE= 0.050 | WIDTH(Y)= 1.500 | RESP(Y)= 1.0000 |             |
| WATER_H / 2 | 3.331081    | 2*1*1    | STAT=Y | PRED= 3.338    | RANGE= 0.050 | WIDTH(Y)= 2.567 | RESP(Y)= 1.0000 |             |

### COUPLING CONSTANTS (HZ):

|        |          |   |       |        |        |               |              |
|--------|----------|---|-------|--------|--------|---------------|--------------|
| J7_8   | -10.9203 | J | H1_4A | H1_4C  | STAT=Y | PRED= -12.300 | RANGE= 0.600 |
| J7_9   | 3.6528   | J | H1_4A | H2_3B  | STAT=Y | PRED= 2.010   | RANGE= 3.200 |
| J7_16  | 5.9231   | J | H1_4A | H5_6B  | STAT=Y | PRED= 5.100   | RANGE= 1.000 |
| J8_9   | 6.5599   | J | H1_4C | H2_3B  | STAT=Y | PRED= 7.870   | RANGE= 5.600 |
| J8_16  | 5.4917   | J | H1_4C | H5_6B  | STAT=Y | PRED= 5.100   | RANGE= 1.000 |
| J9_11  | 8.4977   | J | H2_3B | H2_3B  | STAT=Y | PRED= 5.510   | RANGE= 6.400 |
| J9_17  | 5.2693   | J | H2_3B | H7_8B  | STAT=Y | PRED= 4.300   | RANGE= 1.000 |
| JDMSO1 | 1.7939   | J | DMSO  | DMSOD1 | STAT=Y | PRED= 1.700   | RANGE= 0.050 |
| JDMSO1 | 1.7939   | J | DMSO  | DMSOD2 | STAT=Y | PRED= 1.700   | RANGE= 0.050 |

### CONTROL PARAMETERS:

Solvent = none (def. 99% enriched)  
1.000 = Concentration (vol%, def=1.0%)  
0.00100000 = Minimum line-intensity  
0.00100000 = Diagonalization criterium (not in use)  
600.13153100 = FIELD(1H,MHz), used to transform shifts to ppms  
4.72696384 = Left frequency (ppm)  
2.14103048 = Right frequency (ppm)  
0.000 = Acquisition time (s, for QMtls)  
1.311 = Line-width (for modes D, P & T, 0=use defaults)  
0.068609934 = Data-point resolution (Hz)  
94.921 = GAUSSIAN (% , 0=use default from INF)  
-5.816 = Dispersion contribution (% , 0=use default from INF)  
0.00000000 = Decoupling frequency (for DORES)

CONSTRAINTS (in equations X0 = 1.0)...use no empty lines

EQUAL DMSOD1 = DMSOD2

END of FILE

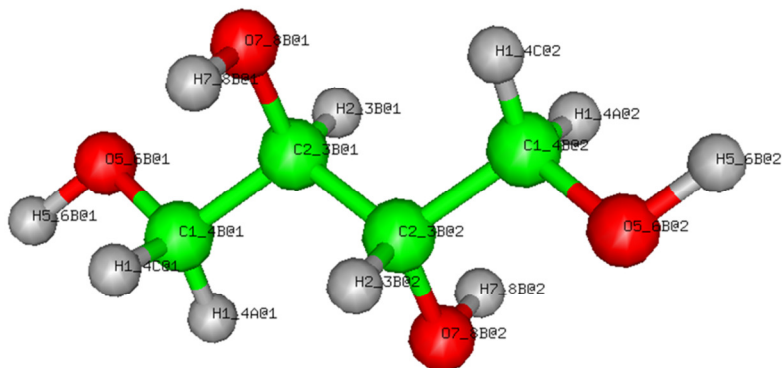

**S22.** The  $^1\text{H}$  fingerprint of erythritol (**12**) in  $\text{DMSO-}d_6$  (107 mM, 600 MHz, 298 K). The calculated and observed NMR spectra are shown in red and blue, respectively.

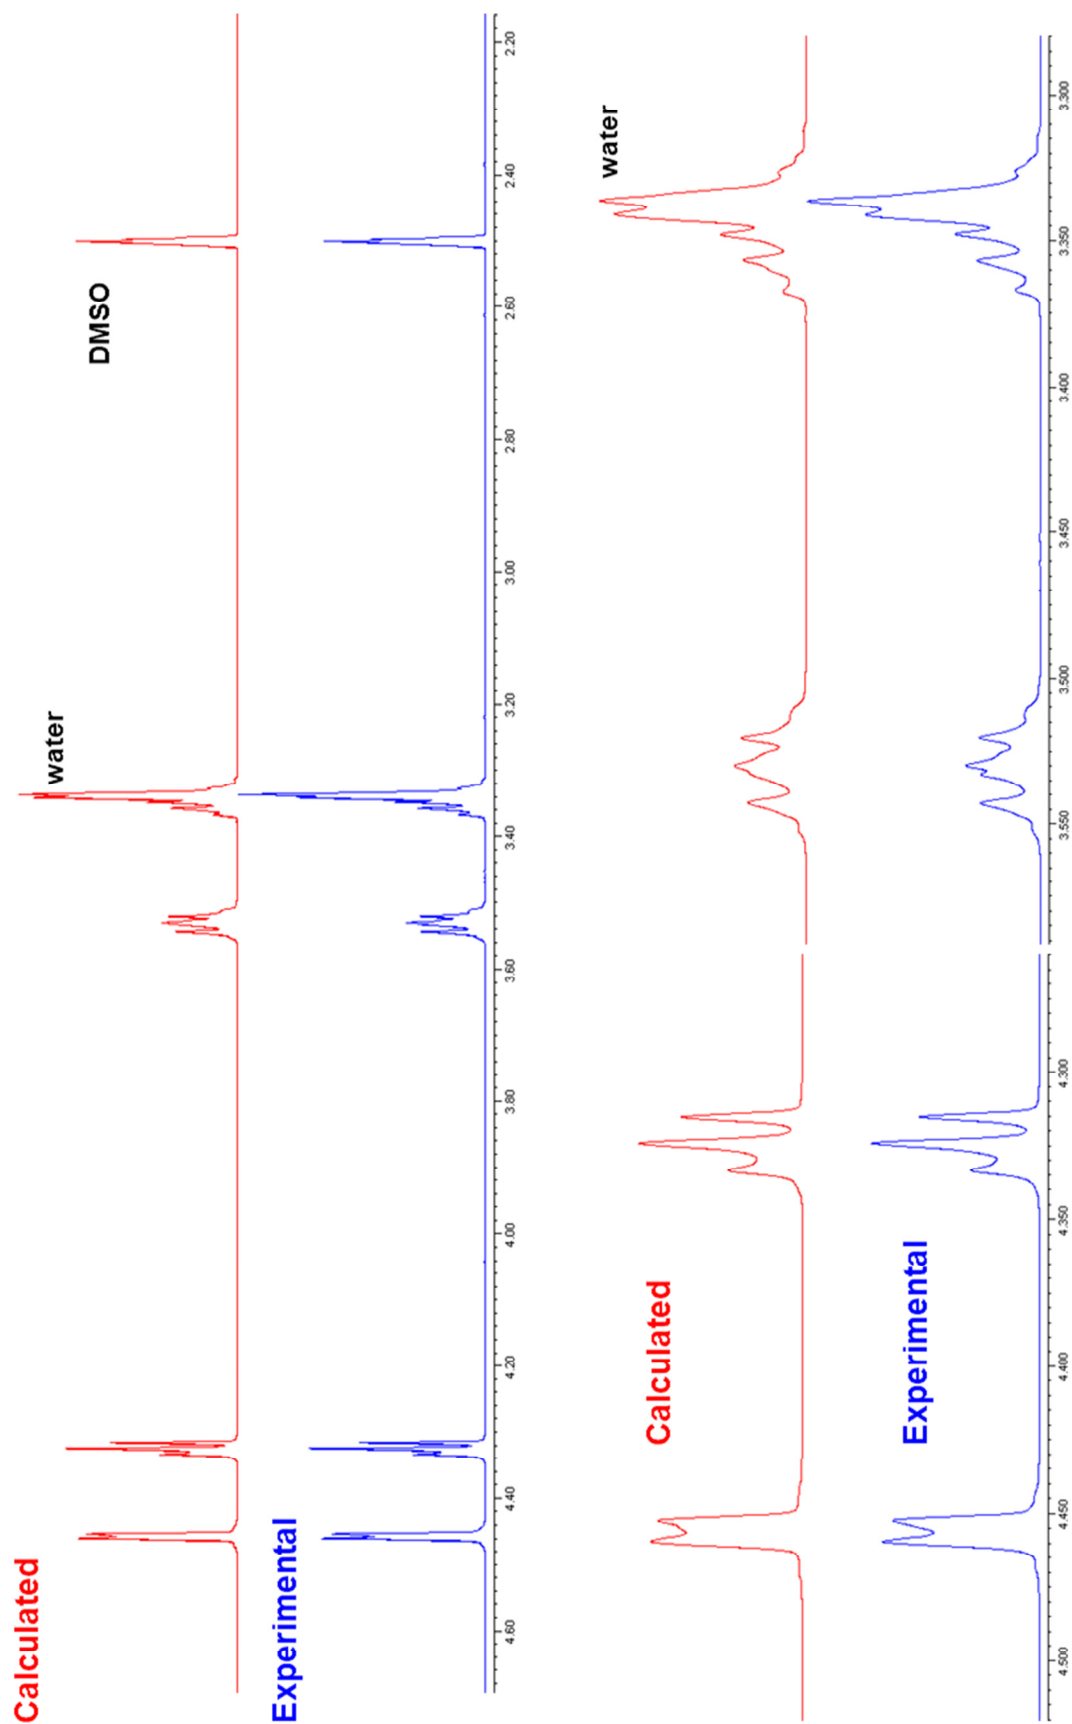

Supplement: NIHMS745472-supplement-supplement_1.pdf [file NIHMS745472-supplement-supplement_1.pdf]
